# Supplementary material for: Factors influencing receipt of an antibiotic prescription among insured patients in Tanzania: a cross-sectional study
Source: PubMed Central journal article supplement — BMJ Open. 2022 Nov 4;12(11):e062147. doi: 10.1136/bmjopen-2022-062147 (PMC9639089; doi:10.1136/bmjopen-2022-062147), 2022-11-04
Supplement: bmjopen-2022-062147.draft_revisions.pdf [file bmjopen-2022-062147.draft_revisions.pdf]

# BMJ Open

BMJ Open is committed to open peer review. As part of this commitment we make the peer review history of every article we publish publicly available.

When an article is published we post the peer reviewers' comments and the authors' responses online. We also post the versions of the paper that were used during peer review. These are the versions that the peer review comments apply to.

The versions of the paper that follow are the versions that were submitted during the peer review process. They are not the versions of record or the final published versions. They should not be cited or distributed as the published version of this manuscript.

BMJ Open is an open access journal and the full, final, typeset and author-corrected version of record of the manuscript is available on our site with no access controls, subscription charges or pay-per-view fees (<http://bmjopen.bmj.com>).

If you have any questions on BMJ Open's open peer review process please email [info.bmjopen@bmj.com](mailto:info.bmjopen@bmj.com)

# BMJ Open

## Factors Influencing Receipt of an Antibiotic Prescription Among Insured Patients in Tanzania: A Cross-sectional Study

|                               |                                                                                                                                                                                                                                                                                                                                                                                             |
|-------------------------------|---------------------------------------------------------------------------------------------------------------------------------------------------------------------------------------------------------------------------------------------------------------------------------------------------------------------------------------------------------------------------------------------|
| Journal:                      | <i>BMJ Open</i>                                                                                                                                                                                                                                                                                                                                                                             |
| Manuscript ID                 | bmjopen-2022-062147                                                                                                                                                                                                                                                                                                                                                                         |
| Article Type:                 | Original research                                                                                                                                                                                                                                                                                                                                                                           |
| Date Submitted by the Author: | 21-Feb-2022                                                                                                                                                                                                                                                                                                                                                                                 |
| Complete List of Authors:     | Khalfan, Mohamed; Muhimbili University of Health and Allied Sciences, Department of Clinical Pharmacology, School of Medicine<br>Sasi, Philip ; Muhimbili University of Health and Allied Sciences, Department of Clinical Pharmacology, School of Medicine<br>Mugusi, Sabina ; Muhimbili University of Health and Allied Sciences, Department of Clinical Pharmacology, School of Medicine |
| Keywords:                     | Public health < INFECTIOUS DISEASES, Clinical audit < HEALTH SERVICES ADMINISTRATION & MANAGEMENT, THERAPEUTICS, CLINICAL PHARMACOLOGY                                                                                                                                                                                                                                                      |
|                               |                                                                                                                                                                                                                                                                                                                                                                                             |

SCHOLARONE™  
Manuscripts

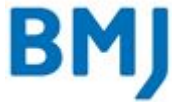

I, the Submitting Author has the right to grant and does grant on behalf of all authors of the Work (as defined in the below author licence), an exclusive licence and/or a non-exclusive licence for contributions from authors who are: i) UK Crown employees; ii) where BMJ has agreed a CC-BY licence shall apply, and/or iii) in accordance with the terms applicable for US Federal Government officers or employees acting as part of their official duties; on a worldwide, perpetual, irrevocable, royalty-free basis to BMJ Publishing Group Ltd ("BMJ") its licensees and where the relevant Journal is co-owned by BMJ to the co-owners of the Journal, to publish the Work in this journal and any other BMJ products and to exploit all rights, as set out in our [licence](#).

The Submitting Author accepts and understands that any supply made under these terms is made by BMJ to the Submitting Author unless you are acting as an employee on behalf of your employer or a postgraduate student of an affiliated institution which is paying any applicable article publishing charge ("APC") for Open Access articles. Where the Submitting Author wishes to make the Work available on an Open Access basis (and intends to pay the relevant APC), the terms of reuse of such Open Access shall be governed by a Creative Commons licence – details of these licences and which [Creative Commons](#) licence will apply to this Work are set out in our licence referred to above.

Other than as permitted in any relevant BMJ Author's Self Archiving Policies, I confirm this Work has not been accepted for publication elsewhere, is not being considered for publication elsewhere and does not duplicate material already published. I confirm all authors consent to publication of this Work and authorise the granting of this licence.

# Factors Influencing Receipt of an Antibiotic Prescription Among Insured Patients in Tanzania: A Cross-sectional Study

Mohamed Ally Khalfan (M.D., M.P.H., M.Sc.)<sup>\*</sup>, Philip Galula Sasi (M.D. MMed., Ph. D.)<sup>1</sup>, Sabina Ferdinand Mugusi (M.D., Ph. D.)<sup>1</sup>

<sup>1</sup>Department of Clinical Pharmacology, School of Medicine, Muhimbili University of Health and Allied Health Sciences, Dar es Salaam, Tanzania.

<sup>\*</sup>Corresponding author: Mohamed Ally Khalfan, Department of Clinical Pharmacology, School of Medicine, Muhimbili University of Health and Allied Health Sciences, P. O. Box 65001, Dar es Salaam, Tanzania. E-mail: [medi.ally.mk@gmail.com](mailto:medi.ally.mk@gmail.com), <https://orcid.org/0000-0002-1429-5933>

**Key words:** Antibiotics prescription, Antibiotics resistance, Antimicrobial Stewardship Programs, Insured patients, Tanzania

**Abbreviated running title:** Correlates of antibiotics prescription

## Key messages

- About half of insured patients attending health facilities in Tanzania, receive an antibiotic prescription.
- Significant predictors of receipt of an antibiotic prescription include being a child, having a diagnosis of upper respiratory tract infection, being attended by prescribers with lower qualifications, and attending a lower-level public health facility.
- Consideration of these factors in revisions or establishment of targeted antibiotic stewardship programs may lead to better antibiotic prescribing practices that are critical for combating antibiotic resistance.

**Word count:** 2997

## Strengths and Limitations of this study

- To our knowledge, this is the first study in Tanzania to address predictors of receipt of an antibiotic prescription among insured patients.
- Insured patients being an increasing patient population in recent times and its anticipated risk of polypharmacy, studying antibiotic utilization in this group is important.
- Being a cross-sectional design, our study, doesn't account for seasonal variations in antibiotic use, it lacks robustness in establishing causality, and is less generalizable.
- Using patient claim forms submitted to the insurance fund as our data source ensured no missing data as incomplete forms are not processed for payment and usually returned to the healthcare provider
- Using the Odds Ratio to report associations may have overestimated the magnitude of the association observed. We, therefore interpret our findings with caution.

## 37 ABSTRACT

38 **Objectives:** Over-prescription of antibiotics may accelerate the development of resistant  
39 pathogens. Any effective mitigation requires an understanding of the factors that influence  
40 antibiotic prescribing. Yet, there is a paucity of data regarding local factors that predicts antibiotics  
41 prescription. We assessed the correlates of receipt of an antibiotic prescription among insured  
42 patients

43 **Methods:** We conducted a cross-sectional study using a data extraction form to captured data from  
44 the claim forms submitted to Ilala NHIF offices for September 2019. Predictors of receipt of an  
45 antibiotic prescription were determined by logistic regression analysis.

46 **Results:** Of 993 analyzed patients the mean [ $\pm$ SD] age was 36.3 [ $\pm$ 23.2] years, 581 [58.5%] were  
47 females, and 535 [53.9%] were adults. The prevalence of receipt an antibiotic prescription was  
48 46.4% (95% CI, 42.8-50.0). Strong predictors of receipt of an antibiotic prescription included; a  
49 diagnosis of acute tonsillitis 46.1 (95% CI, 5.8-364.4); being attended by a Clinical Officer 6.2  
50 (95% CI, 2.0-19.8); attending a Health Center 3.2 (95% CI,1.5-6.5); URTI of multiple and  
51 unspecified site 3.1 (95% CI, 1.5-6.7) and being a child 2.9 (95% CI, 1.6-5.2). Attending a private  
52 health facility was protective for receipt of an antibiotic prescription 0.5 (95% CI, 0.3-0.9).

53 **Conclusions:** Among insured patients, acute URTI, being attended by a less-qualified prescriber,  
54 attending a public lower-level facility and being a child predicts receipt of an antibiotic  
55 prescription. Incorporation of these findings in revisions or establishment of targeted antimicrobial  
56 stewardship programs may lead to better antibiotic prescribing practices that are critical for  
57 combating antibiotic resistance.

58

59

## 60 INTRODUCTION

61 Curtailing antibiotics consumption is important to global health. Antibiotics use and misuse may predispose  
62 to development of resistant bacteria. [1–4] Furthermore, it is estimated that half of the prescribed  
63 antimicrobials are inappropriate. [5] We should strive to preserve antibiotics at all costs by providing a  
64 balance between access and excess as both have detrimental consequences. Delayed access may promote  
65 mortality from bacterial infections whilst excessive use increases selection pressure thereby favoring the  
66 development of resistant strains. [6] Increased antibiotic exposure in healthcare settings is among the key  
67 modifiable drivers of antibiotic resistance. [7,8]

68 Emergence and spread of antibiotic resistant bacteria far outweigh the speed with which newer  
69 antibiotics receives market approval. [9] Humana, animals, as well as the surroundings face the catastrophic  
70 consequences of antibiotics resistance. [10,11] The consequences of which are associated with higher  
71 morbidity, longer duration of hospital stay, higher mortality rates and increased healthcare cost [12,13].  
72 These consequences are more pronounced in Low- and Middle-Income Countries (LMICs) due to burden  
73 of infections, limited resources, poor health system, and weak regulatory enforcement to oversee antibiotics  
74 quality assurance, prescriptions and dispensing outlets. [5]

75 In Tanzania, resistance to commonly prescribed antibiotics was demonstrated in up to 60% of  $\beta$ -  
76 lactamase bacterial isolates. [14] In another study, 43.3% of staphylococcus aureus nasal isolates which are  
77 resistant to methicillin were also resistant to, second generation cephalosporin, cefoxitin. [15] Some studies  
78 in children found bacterial pathogens resistant to multiple antibiotics. [16,17] Therefore, the need of curbing  
79 antibiotic prescriptions so as to contribute in the fight against antibiotic resistance is warranted.

80 It has been argued that, the more we procrastinate on taking urgent action to protect the current  
81 antibiotics we have, the more difficult and expensive it will be to tackle antibiotic resistance in the future.  
82 [18] To combat the problem of increased use of antibiotics and its consequence, a One Health Approach  
83 coupled with political will, is necessary in terms of building capacity in areas of Antimicrobial Stewardship  
84 Programs (ASPs) and infection control. [19–21] Globally, ASPs in hospitals has shown promise in reducing

1  
2  
3 85 irrational antibiotic prescriptions. However, implementation challenges and heterogeneity in structures for  
4  
5 86 antimicrobial stewardship in LMICs, emphasize the need for tailored stewardship programs. [22,23]  
6

7 87 We conducted a study to identify factors that influence receipt of an antibiotic prescription among  
8  
9 88 insured patients. ASPs in LMICs are often not comprehensively implemented and this may be partly  
10  
11 89 because of lack of resources and awareness of local important factors that influence antibiotic prescription.  
12  
13 90 [24,25] It is known that factors from health care providers, patients, and the health system may influence  
14  
15 91 the antibiotic prescription rate. Moreover, there is limited data regarding local correlates of antibiotics  
16  
17 92 prescription among insured patients in Tanzania. This poses a key barrier in developing and implementing  
18  
19 93 targeted Antimicrobial Stewardship Programs.  
20

21  
22 94

## 23 24 95 **MATERIALS AND METHODS**

25  
26  
27 96 We did a cross sectional study of antibiotics prescription to patients insured by the National Health  
28  
29 97 Insurance Fund (NHIF) involving claim forms submitted to the Fund by health facilities in Dar es Salaam  
30  
31 98 City Council (formerly Ilala municipal council) in Dar es Salaam. Part of the methodology have previously  
32  
33 99 been published. [26] Briefly, data collection from the claim forms was accomplished using a specially  
34  
35 100 designed form. All forms submitted for claims, in the study period, were included in the study. Each claim  
36  
37 101 form represented a single patient visit. We excluded forms for patients attended by physiotherapists or  
38  
39 102 occupational therapists as they were not prescribers.  
40

41  
42 103 Claim forms for 378 patients was our initial sample size and was obtained by assuming 67.7% as  
43  
44 104 prevalence of receiving an antibiotic prescription, [27] a margin of error of 5 % and a 10 % chance of  
45  
46 105 incomplete forms. [28] However, in view of readily available patient claim forms, absence of additional  
47  
48 106 risk to patients and affordability of data collection process, the planned sample size was increased to claim  
49  
50 107 forms for 1100 patients. This was done in order to obtain precise estimates and to have enough data for sub-  
51  
52 108 group analysis with adequate statistical power. Claim forms included in the study were selected randomly  
53  
54 109 [29] from the eligible forms (2A & B) for the month of September 2019 submitted to NHIF headquarters.  
55  
56  
57  
58  
59

1  
2  
3 110 The dependent variable was receipt of an antibiotic prescription. It was a No/Yes binary variable.  
4  
5 111 A no/yes question was recorded whether the client received an antibiotic prescription during the health  
6  
7 112 facility visit. The independent variables were sociodemographic, level of health facility, ownership of  
8  
9 113 health facility (public vs private), final ICD-10 diagnosis code, department visited (inpatient vs outpatient),  
10  
11 114 surgical procedure, polypharmacy (optimal number of drugs per encounter  $\leq 3$ ), generic name prescribing  
12  
13 115 (optimal 100%), safe injection prescribing (encounter with an injection prescribed, optimal  $\leq 10\%$ ),  
14  
15 116 Essential Drug List prescribing (optimal 100%), and prescriber qualification such as Clinical Officer  
16  
17 117 (CO)/Dental Therapist (DT), Assistant Medical/Dental Officer (AMO/ADO), Medical/Dental Officer  
18  
19 118 (MO/DO), Specialist, Super-specialist or Consultant). The factors that may influence receipt of an antibiotic  
20  
21 119 prescription were derived from the NHIF claim forms 2A & B.  
22  
23  
24

25 120 There were no missing data in our study as our data source was the patient claim forms submitted  
26  
27 121 to the insurance fund for payment claims by health facilities. Health facilities ensure the completeness of  
28  
29 122 the claim forms so as to avoid any delay in the payment process. We used IBM SPSS Statistics Software  
30  
31 123 Version 23 to analyze our data. Descriptive statistics summarized categorical variables whereas numerical  
32  
33 124 data was summarized by using mean and median. Chi-square Test determined the associations between  
34  
35 125 dependent variable (receipt of an antibiotic prescription) and independent variables (factors that influence  
36  
37 126 receipt of an antibiotic prescription) and Fishers Exact Test was used where appropriate. A p-value cut off  
38  
39 127 point of 0.2 was used to enter the covariates in the logistic regression model. To control for confounding,  
40  
41 128 we performed univariable and multivariable logistic regression analysis to predict receipt of an antibiotic  
42  
43 129 prescription.  
44  
45  
46

### 47 130 **Patient and Public Involvement**

48  
49 131 It was not possible to involve patients and the public in the design, conduct, and reporting of the study  
50  
51 132 however dissemination plans of the findings to relevant authorities exists.  
52  
53  
54

53 133  
54  
55 134  
56  
57  
58  
59  
60



## 135 RESULTS

### 136 Patient characteristics

137 Sociodemographic characteristics of patients of this study has been published elsewhere. [26] In summary,  
138 out of 993 patients who met the analysis criteria, adults comprised the majority 535 (53.9%) and  
139 581(58.5%) patients were of female sex. The average age ( $\pm$  Standard Deviation - SD) was 36.3 ( $\pm$  23.2)  
140 years. Most patients visited the outpatient department 975 (98.2%) and private health care facilities 525  
141 (52.9%). Majority of patients 548 (55.2%) attended facilities at the national level and most received a  
142 specialist consultation 437 (44.0%) (Table 1). The complete list of patient characteristics is found in the  
143 supplement (Supplement 1). The outcome of interest, receipt of an antibiotic prescription, was found in  
144 46.4% of patients

145 Diagnoses were reported using ICD-10 diagnostic criteria. Among patients, other disorders of the urinary  
146 system (9.3%) was the most common diagnosis followed by essential hypertension (7.4%). The other  
147 disorders of urinary system, ICD10-N39 diagnostic code, encompass diagnoses such as: Urinary Tract  
148 Infection (UTI), site not specified; persistent proteinuria, unspecified; stress incontinence; other specified  
149 urinary incontinence; other specified disorders of urinary system and disorders of urinary system,  
150 unspecified. The prevalence of acute and URTI of multiple and unspecified site was 6.5% whereas that of  
151 acute tonsillitis was 2.4% (Table 2). A complete list of all diagnoses is found in supplement 1.

### 152 Patient characteristics by receipt of an antibiotic prescription

153 About two-thirds of children (65.4%) received an antibiotic prescription when compared with adults and  
154 the elderly (Figure 1). Over three-quarters of patients (77.0%) who attended lower-level health facilities  
155 such as dispensaries received an antibiotic prescription compared to those who attended higher-level health  
156 facilities such as the referral hospitals (Figure 2). A higher proportion (80.0%) of patients who were  
157 attended by prescribers with lower qualification such as assistant medical/dental officers received an  
158 antibiotic prescription when compared with other cadres (Figure 3).

159

160 **Table 1. Socio-demographic and other patient characteristics**

| Characteristic (N = 993)                                                     | n (%)      |
|------------------------------------------------------------------------------|------------|
| <b>Age in years</b>                                                          |            |
| Mean (SD) = 36.3 (23.2), Median = 37.0                                       |            |
| Children (< 18 years)                                                        | 264 (26.6) |
| Adults (18-59 years)                                                         | 535 (53.9) |
| Elderly ( $\geq$ 60 years)                                                   | 194 (19.5) |
| <b>Sex</b>                                                                   |            |
| Male                                                                         | 412 (41.5) |
| Female                                                                       | 581 (58.5) |
| <b>Level of health facility</b>                                              |            |
| Dispensary                                                                   | 102 (10.3) |
| Health Centre/Stand-alone clinic by Assistant Dental Officer                 | 119 (12.0) |
| District Hospital/Clinic Level 1 by Medical/Dental Officer                   | 101 (10.2) |
| Regional Hospital/Clinic Level 2 by specialist                               | 123 (12.4) |
| National Referral Hospital/Zonal Hospital/Clinic Level 3 by super-specialist | 548 (55.2) |
| <b>Ownership of health facility</b>                                          |            |
| Public                                                                       | 468 (47.1) |
| Private                                                                      | 525 (52.9) |
| <b>Department visited</b>                                                    |            |
| Outpatient                                                                   | 975 (98.2) |
| Inpatient                                                                    | 18 (1.8)   |
| <b>Any Procedure/Surgery done</b>                                            |            |
| No                                                                           | 940 (94.7) |
| Yes                                                                          | 53 (5.3)   |
| <b>Prescriber Qualification</b>                                              |            |
| Clinical Officer/Dental Therapist                                            | 132 (13.3) |
| Assistant Medical/Dental Officer                                             | 18 (1.8)   |
| Medical/Dental Officer                                                       | 320 (32.2) |
| Specialist                                                                   | 437 (44.0) |
| Super-specialist/Consultant                                                  | 86 (8.7)   |

161  
 162 More than two-third of patients (70.6%), who visited the inpatient department, received an antibiotic  
 163 prescription compared to those who visited the outpatient department. A complete list of distribution of  
 164 study characteristics by receipt of an antibiotic prescription is presented in Supplement 2. Most patients

165 with a acute tonsillitis (95.8%) and those of other disorders of urinary system (93.7%) were prescribed an  
 166 antibiotic (Supplement 2).

167 **Table 2: Top ten and other select-diagnosis**

| Characteristic (N = 993)                                               | n (%)      |
|------------------------------------------------------------------------|------------|
| <b>Diagnosis code</b>                                                  |            |
| Other disorders of urinary system such as UTI, unspecified             | 102 (10.3) |
| Essential (primary) hypertension                                       | 81 (8.2)   |
| Acute and URTI of multiple and unspecified sites                       | 65 (6.5)   |
| Type 2 diabetes mellitus                                               | 51 (5.1)   |
| Spondylosis                                                            | 42 (4.2)   |
| Hypertensive Heart Disease                                             | 42 (4.2)   |
| Gastritis and duodenitis                                               | 39 (3.9)   |
| Disorders of lipoprotein metabolism and other lipidemias               | 36 (3.6)   |
| Pain, not elsewhere classified                                         | 33 (3.3)   |
| Iron deficiency anemia                                                 | 31 (3.1)   |
| Dermatophytosis                                                        | 31 (3.1)   |
| Vasomotor and allergic rhinitis                                        | 27 (2.7)   |
| Atopic dermatitis                                                      | 27 (2.7)   |
| Other sepsis                                                           | 25 (2.5)   |
| Acute nasopharyngitis (common cold)                                    | 24 (2.4)   |
| Acute tonsillitis                                                      | 24 (2.4)   |
| Conjunctivitis                                                         | 16 (1.6)   |
| Diseases of pulp and periapical tissues                                | 17 (1.7)   |
| Candidiasis                                                            | 14 (1.4)   |
| Bacterial infection of unspecified site                                | 11 (1.1)   |
| Pneumonia, unspecified organism                                        | 11 (1.1)   |
| Gingivitis and periodontal diseases                                    | 8 (0.8)    |
| Other female pelvic inflammatory diseases                              | 8 (0.8)    |
| Amoebiasis                                                             | 7 (0.7)    |
| Other gastroenteritis and colitis of infectious and unspecified origin | 7 (0.7)    |
| Acute pharyngitis                                                      | 6 (0.6)    |
| Bacterial pneumonia, not elsewhere classified                          | 6 (0.6)    |
| Infections of genitourinary tract in pregnancy                         | 4 (0.4)    |
| Chronic rhinitis, nasopharyngitis and pharyngitis                      | 4 (0.4)    |
| Cutaneous abscess, furuncle and carbuncle                              | 4 (0.4)    |

168

169 **Independent predictors of receipt of an antibiotic prescription.**

170 Evidence of an association between the following factors and receipt of an antibiotic prescription were  
 171 observed (Table 3). The odds of receipt of an antibiotic prescription were highest among patients with acute

1  
2  
3 172 tonsillitis in which it was about forty-six times compared to those who have no such a diagnosis. This was  
4  
5 173 followed by a diagnosis of other disorders of the urinary system such as UTI, unspecified in which the odds  
6  
7 174 were about twenty-seven times (aOR = 26.8, 95% CI; 10.7-67.3),  $p < 0.01$ . Moreover, a diagnosis of acute  
8  
9 175 and URTI of multiple and unspecified site was associated with receipt of an antibiotic prescription with the  
10  
11 176 odds of about three times than those who were not (aOR = 3.1, 95% CI; 1.5-6.7),  $p < 0.01$ .

14 177 The probability of receipt of an antibiotic prescription was about three times in children compared  
15  
16 178 with the elderly. Attending a Health Center was associated with about three times likelihood of receipt of  
17  
18 179 an antibiotic prescription compared to those who attended the National Referral Hospital (aOR = 3.2, 95%  
19  
20 180 CI; 1.5-6.5),  $p < 0.01$ . Furthermore, the odds of receipt of an antibiotic prescription was about six times  
21  
22 181 higher in patients attended by prescribers with low qualification such as Clinical Officer or Dental Therapist  
23  
24 182 compared to those attended by a consultant. There was a decreasing trend in the odds of receiving an  
25  
26 183 antibiotic prescription as the prescriber qualification increase (Table 3). Patients with non-ideal generic  
27  
28 184 prescriptions had a two times likelihood of receipt of an antibiotic prescription compared to patients with  
29  
30 185 ideal generic prescriptions (aOR = 2.1, 95% CI; 1.4-3.2),  $p < 0.01$ .

34 186 Moreover, patients who attended a District Hospital/Level 1 clinic were 2.7 times more likely for  
35  
36 187 receipt of an antibiotic prescription when compared to those who attended the National Referral Hospital  
37  
38 188 whereas attending a privately-owned health-care was associated with 50% less likelihood of receipt of an  
39  
40 189 antibiotic prescription compared to those who visited public facilities.

43 190 The probability of receipt of an antibiotic prescription was highest (aOR = 46.1) among patients  
44  
45 191 with acute tonsillitis (Figure 4). Similar odds of receipt of an antibiotic prescription were seen in patients  
46  
47 192 having diagnoses of candidiasis, bacterial infection of unspecified site and pneumonia, unspecified  
48  
49 193 organism. Moreover, attending a private health facility was found to have a protective effect on receipt of  
50  
51 194 an antibiotic prescription. The complete list of variables subjected to univariate and multivariate analysis is  
52  
53 195 found in Supplement 3.

196 **Table 3: Binary Logistic Regression analysis of predictors of receipt of antibiotic prescription**

| Characteristic (N = 770)                                      | Univariate Regression |         | Multivariate Regression |         |
|---------------------------------------------------------------|-----------------------|---------|-------------------------|---------|
|                                                               | cOR* (95% CI)         | P value | aOR** (95% CI)          | P value |
| <b>Age in years</b>                                           |                       |         |                         |         |
| Elderly ( $\geq 60$ years)                                    | 1 [Ref.]              |         | 1 [Ref.]                |         |
| Children (< 18 years)                                         | 6.3 (3.9 - 10.1)      | < 0.01  | 2.9 (1.6 - 5.2)         | < 0.01  |
| Adults (18-59 years)                                          | 2.8 (1.8 - 4.2)       | < 0.01  | 1.7 (1.0 - 2.8)         | 0.06    |
| <b>Level of health facility</b>                               |                       |         |                         |         |
| Referral Hospital/Clinic L3 by SS                             | 1 [Ref.]              |         | 1 [Ref.]                |         |
| Dispensary                                                    | 7.6 (4.6 - 12.8)      | < 0.01  | 1.4 (0.5 - 3.8)         | 0.56    |
| Health Centre/Stand-alone clinic by ADO                       | 4.0 (2.5 - 6.2)       | < 0.01  | 3.2 (1.5 - 6.5)         | < 0.01  |
| District Hospital/Clinic L1 by MO/DO                          | 5.9 (3.5 - 9.7)       | < 0.01  | 2.7 (1.3 - 5.8)         | 0.01    |
| Regional Hospital/Clinic L2 by Specialist                     | 1.1 (0.7 - 1.7)       | 0.87    | 1.1 (0.6 - 2.2)         | 0.70    |
| <b>Ownership of health facility</b>                           |                       |         |                         |         |
| Public                                                        | 1 [Ref.]              |         | 1 [Ref.]                |         |
| Private/Non-governmental                                      | 1.9 (1.4 - 2.5)       | < 0.01  | 0.5 (0.3 - 0.9)         | 0.01    |
| <b>Department visited</b>                                     |                       |         |                         |         |
| Outpatient                                                    | 1 [Ref.]              |         | 1 [Ref.]                |         |
| Inpatient                                                     | 2.8 (1.0 - 8.1)       | 0.05    | 2.9 (0.8 - 11.1)        | 0.12    |
| <b>Any Procedure/Surgery done</b>                             |                       |         |                         |         |
| No                                                            | 1 [Ref.]              |         | 1 [Ref.]                |         |
| Yes                                                           | 2.3 (1.0 - 4.9)       | 0.04    | 3.9 (1.4 - 10.9)        | 0.01    |
| <b>Prescriber Qualification</b>                               |                       |         |                         |         |
| Super-specialist/Consultant                                   | 1 [Ref.]              |         | 1 [Ref.]                |         |
| Clinical Officer/Dental Therapist                             | 12.4 (6.0 - 25.9)     | < 0.01  | 6.2 (2.0 - 19.8)        | < 0.01  |
| Assistant Medical/Dental Officer                              | 13.4 (3.3 - 54.4)     | < 0.01  | 4.3 (0.8 - 24.3)        | 0.09    |
| Medical/Dental Officer                                        | 3.6 (1.9 - 6.7)       | < 0.01  | 2.2 (0.9 - 5.3)         | 0.07    |
| Specialist                                                    | 1.5 (0.8 - 2.8)       | 0.25    | 1.4 (0.6 - 3.1)         | 0.45    |
| <b>All medications prescribed using their generic names</b>   |                       |         |                         |         |
| Yes                                                           | 1 [Ref.]              |         | 1 [Ref.]                |         |
| No                                                            | 1.4 (1.1 - 1.9)       | 0.02    | 2.1 (1.4 - 3.2)         | < 0.01  |
| <b>Was malaria treatment prescribed</b>                       |                       |         |                         |         |
| No                                                            | 1 [Ref.]              |         | 1 [Ref.]                |         |
| Yes                                                           | 2.6 (1.0 - 6.8)       | 0.06    | 1.3 (0.3 - 4.6)         | 0.73    |
| <b>Presence of injectable formulation in the prescription</b> |                       |         |                         |         |
| No                                                            | 1 [Ref.]              |         | 1 [Ref.]                |         |
| Yes                                                           | 2.0 (1.2 - 3.3)       | 0.01    | 2.1 (1.0 - 4.2)         | 0.04    |

\*cOR, Crude Odds Ratio; \*\*aOR, Adjusted Odds Ratio; CI, Confidence Interval, AMO, Assistant Medical Officer;

ADO, Assistant Dental Officer; MO, Medical Officer; SS, Super-specialist; NA, Not Applicable; L1, Level 1; L2, Level 2; L3, Level 3. Ref. Reference group

**Table 3: Binary Logistic Regression analysis of predictors of receipt of antibiotic prescription (continued...)**

| Characteristic (n = 770)                                                            | Univariate Regression |         | Multivariate Regression |         |
|-------------------------------------------------------------------------------------|-----------------------|---------|-------------------------|---------|
|                                                                                     | cOR* (95% CI)         | P value | aOR** (95% CI)          | P value |
| <b>Select Diagnostic Codes</b>                                                      |                       |         |                         |         |
| <b>Other disorders of urinary system - N39</b>                                      |                       |         |                         |         |
| No                                                                                  | 1 [Ref.]              |         | 1 [Ref.]                |         |
| Yes                                                                                 | 22.5 (9.7 - 52.2)     | < 0.01  | 26.8 (10.7 - 67.3)      | < 0.01  |
| <b>Acute and URTI of multiple and unspecified sites - J06</b>                       |                       |         |                         |         |
| No                                                                                  | 1 [Ref.]              |         | 1 [Ref.]                |         |
| Yes                                                                                 | 5.1 (2.7 - 9.6)       | < 0.01  | 3.1 (1.5 - 6.7)         | < 0.01  |
| <b>Other sepsis - A41</b>                                                           |                       |         |                         |         |
| No                                                                                  | 1 [Ref.]              |         | 1 [Ref.]                |         |
| Yes                                                                                 | 5.7 (1.9 - 17.1)      | < 0.01  | 7.1 (2.0 - 25.0)        | < 0.01  |
| <b>Acute tonsillitis - J03</b>                                                      |                       |         |                         |         |
| No                                                                                  | 1 [Ref.]              |         | 1 [Ref.]                |         |
| Yes                                                                                 | 28.4 (3.8 - 211.2)    | < 0.01  | 46.1 (5.8 - 364.4)      | < 0.01  |
| <b>Acute pharyngitis - J02</b>                                                      |                       |         |                         |         |
| No                                                                                  | 1 [Ref.]              |         | 1 [Ref.]                |         |
| Yes                                                                                 | 5.9 (0.7 - 50.3)      | 0.11    | 12.1 (1.2 - 124.7)      | 0.04    |
| <b>Candidiasis - B37</b>                                                            |                       |         |                         |         |
| No                                                                                  | 1 [Ref.]              |         | 1 [Ref.]                |         |
| Yes                                                                                 | 7.1 (1.6 - 32.2)      | 0.01    | 6.0 (1.1 - 32.0)        | 0.04    |
| <b>Bacterial infection of unspecified site - A49</b>                                |                       |         |                         |         |
| No                                                                                  | 1 [Ref.]              |         | 1 [Ref.]                |         |
| Yes                                                                                 | 5.3 (1.1 - 24.8)      | 0.03    | 6.1 (1.2 - 30.8)        | 0.03    |
| <b>Pneumonia, unspecified organism - J18</b>                                        |                       |         |                         |         |
| No                                                                                  | 1 [Ref.]              |         | 1 [Ref.]                |         |
| Yes                                                                                 | 4.7 (1.0 - 22.3)      | 0.05    | 6.1 (1.1 - 32.7)        | 0.04    |
| <b>Other female pelvic inflammatory diseases - N73</b>                              |                       |         |                         |         |
| No                                                                                  | 1 [Ref.]              |         | 1 [Ref.]                |         |
| Yes                                                                                 | 7.0 (0.8 - 58.8)      | 0.07    | 16.3 (1.6 - 167.2)      | 0.02    |
| <b>Other gastroenteritis and colitis of infectious and unspecified origin - A09</b> |                       |         |                         |         |
| No                                                                                  | 1 [Ref.]              |         | 1 [Ref.]                |         |
| Yes                                                                                 | 7.0 (0.8 - 58.8)      | 0.07    | 7.7 (0.6 - 99.3)        | 0.12    |
| <b>Gingivitis and periodontal disease - K05</b>                                     |                       |         |                         |         |
| No                                                                                  | 1 [Ref.]              |         | 1 [Ref.]                |         |
| Yes                                                                                 | 4.7 (0.5 - 42.0)      | 0.17    | 5.6 (0.5 - 61.3)        | 0.16    |
| <b>Conjunctivitis - H10</b>                                                         |                       |         |                         |         |
| No                                                                                  | 1 [Ref.]              |         | 1 [Ref.]                |         |
| Yes                                                                                 | 2.4 (0.8 - 6.9)       | 0.12    | 6.4 (1.7 - 24.1)        | 0.01    |

\*cOR, Crude Odds Ratio; \*\*aOR, Adjusted Odds Ratio; CI, Confidence Interval; Ref., Reference.

197

198

## 199 **DISCUSSION**

200 Antibiotics are the most important tool for control of bacterial infections, the commonest human infections  
201 that can be life-threatening. In addition, sometimes antibiotics are used to prevent bacterial infections when  
202 the risk of infection of an individual is high. As the result, infections that were severe and often fatal before  
203 the discovery and development of antibiotics can easily be treated with antibiotics today. However,  
204 excessive use and misuse have always threatened the benefits of antibiotics as the two can lead to the  
205 emergence and spread of resistance, which is currently the major challenge in the control of bacterial  
206 infections. Therefore, for longer effective-life of antibiotics and continued livelihood of the world  
207 population, misuse of antibiotics has to be stopped and antibiotic use needs to be kept at optimal levels.

208 Antimicrobial stewardship is the most promising strategy to stop misuse and excessive use of  
209 antibiotics. However, implementation of such programs is challenging and thus, research looking into ways  
210 of strengthening antibiotic stewardship programs is critical for ensuring optimal clinical outcomes, minimal  
211 unintended consequences of antibiotics use, improved susceptibility rates to targeted antibiotics, optimal  
212 resource utilization and hence, control of bacterial infections.

213 The thrust of our study was to define factors that are strong predictors of an antibiotic prescription  
214 so that ASPs may see where to put emphasis. We have identified diagnosis of acute URTI as the strongest  
215 predictor of an antibiotic prescription in our study population. This means that the microbiology laboratory  
216 aspect of antimicrobial stewardship such as provision of culture and sensitivity results on a regular basis or  
217 preparation of annual antibiotic susceptibility pattern needs to be strengthened. There are criteria, WHO or  
218 IMCI for prescribing an antibiotic for URTI. However, when clinicians are unwilling to go through the  
219 procedures or when procedures are not available, prescription of an antibiotic will be the easy way out and  
220 without taking risk for possibility of untreated or delayed treatment of a bacterial infection. Although most  
221 URTIs have a viral etiology and have a self-limiting course, antibiotics are commonly prescribed. [30] This  
222 observation is in line with other previous published literature that have demonstrated this association. [31–  
223 34] The patient and the public should be informed that most of the URTIs are viral in origin and they require



224 supportive therapy and not antibiotics. This will decrease patient antibiotic expectation. Although some  
225 studies shows no evidence, [35] facility-specific guidelines and algorithms, adapted from national standard  
226 treatment guideline, should be established with respect to properly diagnosing and treating URTIs. [36–38]

227       Being attended by less qualified health care worker is another factor which appears to influence  
228 prescription of an antibiotic. Less qualified clinicians (non-degree holder) are more likely to issue an  
229 antibiotic prescription than the degree holder colleagues. The odds of receipt of an antibiotic prescription  
230 were about six times in patients who were attended by lower-level prescribers such as Clinical Officer or  
231 Dental Therapists when compared to those seen by higher-level prescribers such as consultants. Clinical  
232 Officers and Dental Therapists being less experienced and qualified to prescribe probably explains this  
233 observation. Moreover, Clinical Officers and Dental Therapists usually work in primary healthcare facilities  
234 in which there is a high volume of patients and fewer resources which increases the likelihood of irrational  
235 medication prescriptions including antibiotics. [39] This antibiotic prescribing disparity between  
236 prescribers with different qualifications was also demonstrated in previous studies. [40] Another study in  
237 Hubei, China found that prescribers with lower qualifications were more likely to prescribe antibiotics. [39]  
238 This finding emphasize the need for antibiotic stewardship interventions to target low-level prescribers  
239 through clinical education. Opportunities and protected time for clinicians to address knowledge gap  
240 through continuing medical education has been found to improve antibiotic utilization. [41–43] Therefore,  
241 it is important for hospital policies and administrators to provide clinicians with such opportunities.

242       Studies have shown that patient's likelihood of receipt of an antibiotic prescription is influenced  
243 by the type of health facility they have attended to. A study in Ghana showed that attending a Health Center  
244 or a clinic is associated with receipt of an antibiotic prescription (63.7%). [31] Similarly, we have revealed  
245 that, there is strong evidence of an association between patient attending a Health Center and receiving an  
246 antibiotic prescription when compared to those attending a Referral Hospital. This observation may be  
247 attributed to limited resources in terms of medications and diagnostic capabilities resulting in empiric  
248 prescribing of antibiotics. Indeed, targeting lower-level health facilities with antimicrobial stewardship



249 interventions such clinical education, facility-specific guidelines for common infections, and antibiotic  
250 oversight through prospective audit and feedback may decrease antibiotic prescriptions. [44,45]

251 Surprisingly, our study shows that attending a private facility is less likely to have an antibiotic  
252 prescribed. The odds of receipt of an antibiotic prescription in a private health facility was 50% less than  
253 the odds in a public health facility. This was a surprising finding as private health facilities are driven by  
254 profit, so we did expect them to prescribe more medications including antibiotics to patients when compared  
255 with public health facilities. We speculate that, insured patients are more likely to attend private health  
256 facilities where prescribers better adhere to insurance guidelines than those in public facilities. This was in  
257 line with a South African study by Mohlala and colleagues. [46] This is a worrisome finding as, in general,  
258 majority of patients are likely to be seen in public lower-level health facilities thus antibiotic prescriptions  
259 might be higher than what we have observed. Clinical education, facility-specific guidelines and antibiotic  
260 oversight should be established or strengthened in public health facilities.

261 Our data shows that the probability of receipt of an antibiotic prescription among children are about  
262 three times that of the elderly. URTIs and non-bloody diarrhea being prevalent in children and mostly  
263 treated with antibiotics despite being viral in origin and contrary to treatment guidelines may explain this  
264 finding. [47,48] This observation is comparable to other published results. [31,49–52] Moreover, immune  
265 senescence in the elderly causes atypical presentations of infectious disease symptoms such as fever and  
266 cough whereas in children they are more pronounced. [53] ASPs should be strengthened in pediatrics so as  
267 to decrease antibiotic prescriptions as there is strong evidence supporting that such an approach. [45,54]  
268 Despite the challenges of implementing ASPs in pediatrics, clinical education, care-giver education,  
269 updated facility-specific guidelines and prospective audit and feedback, are stewardship interventions  
270 shown to decrease antibiotics utilization. [44,55,56]

271 Ideally, all medications in a prescription should be written in their generic names as per  
272 WHO/INRUD prescribing indicators. We observed strong evidence of an association between non-ideal  
273 generic prescribing and receipt of an antibiotic prescription. This observation may be explained by the fact

1  
2  
3 274 that both sub-optimal generic prescribing and over-prescribing antibiotics are indicators of poor prescribing  
4  
5 275 practice. [31] It is essential that ASPs enables prescribers adhere to generic prescribing and other good  
6  
7 276 prescribing practices.  
8  
9

10 277 Limitations of this study include inherent weakness of cross-sectional studies as they lack  
11  
12 278 robustness in establishing causality, lack of generalizability of the study findings as our study population  
13  
14 279 was only insured patients, using the odds ratio to report associations may overestimate the magnitude of  
15  
16 280 association, and the overly large sample size used may cause small differences in observations to be  
17  
18 281 statistically significant without any clinical significance. We, therefore interpret our findings with caution.  
19  
20

21 282

## 22 283 **CONCLUSIONS**

23  
24  
25 284 Factors influencing antibiotic prescription in Tanzania are similar to factors reported in literature. URTIs,  
26  
27 285 less qualification of the prescriber, attending a public lower-level health facility, and being a child appear  
28  
29 286 to be the most important factors that when targeted through antimicrobial stewardship activities may have  
30  
31 287 an important impact on antibiotic misuse and excessive use.  
32  
33

34 288 **Ethical approval:** Ethical approval from the research and publication committee of MUHAS was sought  
35  
36 289 and was granted (Ref. No. DA.287/298/01A). We requested further permission from the Director of  
37  
38 290 National Health Insurance Fund (NHIF) to proceed with the study using NHIF database after informing  
39  
40 291 him of the purpose of the study and possible benefits to NHIF as well as to the society at large. Utmost  
41  
42 292 confidentiality was maintained as no personal identifiers were collected by our data capture tool.  
43  
44

45 293 **Author contribution:** MAK, PGS, and SFM conceptualized and designed the study, collected, analysed  
46  
47 294 and interpreted the data. MAK drafted the initial manuscript. MAK, PGS and SFM critically revised the  
48  
49 295 manuscript and approved the final version to be submitted.  
50  
51

52 296 **Acknowledgements:** We thank Mr. Gilbert Kubenea and Sr. Rehema Hassan who helped us to retrieve the  
53  
54 297 files of potentially eligible participants from the archives. We appreciate the help of Dr. Ngalela Kateule  
55  
56  
57  
58  
59

1  
2  
3 298 and Sr. Neema Manga, for assisting us to obtain the sampling frame list. Research assistant, Mr. Roman  
4  
5 299 Mathias, assisted with the data collection. We acknowledge that details of the methods have been published  
6  
7 300 elsewhere. Finally, we thank the management of NHIF for permission and corporation during the conduct  
8  
9 301 of the study.

11 302 **Funding:** This work was supported by Ministry of Education, Science and Technology, Tanzania

14 303 **Conflict of Interest:** None to declare.

17 304 **Data availability statement:** Data set is available upon request from the corresponding author

20 305

## 22 306 REFERENCES

- 25 307 1 Gelband H, Miller-petrie M, Pant S, *et al.* The State of the World ' s Antibiotics 2015. *Wound Healing*  
26 308 *Southern Africa* 2015;**8**:30–4.
- 28 309 2 Roca I, Akova M, Baquero F, *et al.* The global threat of antimicrobial resistance: Science for  
30 310 intervention. *New Microbes and New Infections* 2015;**6**:22–9. doi:10.1016/j.nmni.2015.02.007
- 32 311 3 Wei X, Zhang Z, Walley J, *et al.* Reducing antibiotic for child upper respiratory infections in rural  
33 312 china: an RCT, process evaluation and cost-effectiveness analysis. *American journal of respiratory*  
34 313 *and critical care medicine Conference: american thoracic society international conference, ATS 2018*  
35 314 *United states* 2018;**197**.
- 37 315 4 Yates TD, Davis ME, Taylor YJ, *et al.* Not a magic pill: a qualitative exploration of provider  
38 316 perspectives on antibiotic prescribing in the outpatient setting. *BMC Fam Pract* 2018;**19**:96.  
39 317 doi:10.1186/s12875-018-0788-4
- 41 318 5 Sharland M, Saroey P, Berezin EN. The global threat of antimicrobial resistance - The need for  
43 319 standardized surveillance tools to define burden and develop interventions. *Jornal de Pediatria*  
44 320 *(Versão em Português)* 2015;**91**:410–2. doi:10.1016/j.jpedp.2015.07.014
- 46 321 6 Das P, Horton R. Antibiotics: achieving the balance between access and excess. *The Lancet*  
47 322 2016;**387**:102–4. doi:10.1016/S0140-6736(15)00729-1
- 49 323 7 Holmes AH, Moore LSP, Sundsfjord A, *et al.* Understanding the mechanisms and drivers of  
50 324 antimicrobial resistance. *The Lancet* 2016;**387**:176–87. doi:10.1016/S0140-6736(15)00473-0
- 52 325 8 Karam G, Chastre J, Wilcox MH, *et al.* Antibiotic strategies in the era of multidrug resistance. *Critical*  
54 326 *Care*. 2016;**20**. doi:10.1186/s13054-016-1320-7

- 1  
2  
3 327 9 Ruiz J, Castro I, Calabuig E, *et al.* Non-antibiotic treatment for infectious diseases. *Rev Esp Quimioter*  
4 328 2017;**30**:66–71.  
5  
6 329 10 Williams-nguyen J, Sallach JB, Bartelt-hunt S, *et al.* State of the Science. *Journal of Environmental*  
7 330 *Quality* 2016;**45**:394–406. doi:10.2134/jeq2015.07.0336  
8  
9 331 11 Khabbaz R, Cars O, Kumar S, *et al.* Implementation of the global action plan on antimicrobial  
10 332 resistance. *WHO GAP AMR Newsletter N°32* 2017;:1–4. doi:10.1016/j.visres.2009.03.016  
11  
12 333 12 Manyi-Loh C, Mamphweli S, Meyer E, *et al.* Antibiotic use in agriculture and its consequential  
13 334 resistance in environmental sources: Potential public health implications. 2018.  
14 335 doi:10.3390/molecules23040795  
15  
16 336 13 Friedman ND, Temkin E, Carmeli Y. The negative impact of antibiotic resistance. *Clinical*  
17 337 *Microbiology and Infection*. 2016;**22**:416–22. doi:10.1016/j.cmi.2015.12.002  
18  
19 338 14 Kajeguka DC, Nambunga PP, Kabissi F, *et al.* Antimicrobial resistance patterns of phenotype  
20 339 Extended Spectrum Beta- Lactamase producing bacterial isolates in a referral hospital in northern.  
21 340 *Tanzania Journal of Health Reseach* 2015;**17**:1–8. doi:10.4314/thrb.v17i3.%c  
22  
23 341 15 Kumburu HH, Sonda T, Leekitcharoenphon P, *et al.* Hospital Epidemiology of Methicillin-Resistant  
24 342 *Staphylococcus aureus* in a Tertiary Care Hospital in Moshi, Tanzania, as Determined by Whole  
25 343 Genome Sequencing. *BioMed Research International* 2018;**2018**:1–12. doi:10.1155/2018/2087693  
26  
27 344 16 Christopher A, Mshana SE, Kidenya BR, *et al.* Bacteremia and resistant gram-negative pathogens  
28 345 among under-fives in Tanzania. *Italian Journal of Pediatrics* 2013;**39**. doi:10.1186/1824-7288-39-27  
29  
30 346 17 Ahmed M, Mirambo MM, Mushi MF, *et al.* Bacteremia caused by multidrug-resistant bacteria  
31 347 among hospitalized malnourished children in Mwanza, Tanzania: A cross sectional study. *BMC*  
32 348 *Research Notes* 2017;**10**. doi:10.1186/s13104-017-2389-z  
33  
34 349 18 Tibrewal R. A Review On Combating Antibiotic Resistance. *International Journal of Medical and*  
35 350 *Biomedical Studies* 2018;**1**. doi:10.32553/ijmbs.v1i1.14  
36  
37 351 19 Abu Sin M, Nahrgang S, Ziegelmann A, *et al.* Global and national strategies against antibiotic  
38 352 resistance. *Bundesgesundheitsblatt - Gesundheitsforschung - Gesundheitsschutz*. 2018;**61**:507–14.  
39 353 doi:10.1007/s00103-018-2722-2  
40  
41 354 20 Prentiss T, Weisberg K, Zervos J. Building Capacity in Infection Prevention and Antimicrobial  
42 355 Stewardship in Low- and Middle-Income Countries: the Role of Partnerships Inter-countries. *Current*  
43 356 *Treatment Options in Infectious Diseases* 2018;**10**:7–16. doi:10.1007/s40506-018-0140-5  
44  
45 357 21 Laxminarayan R, Duse A, Wattal C, *et al.* Antibiotic resistance-the need for global solutions. *The*  
46 358 *Lancet Infectious Diseases*. 2013;**13**:1057–98. doi:10.1016/S1473-3099(13)70318-9  
47  
48 359 22 Smith I, Lescure X, Singh S, *et al.* The implementation of antimicrobial stewardship in low, middle  
49 360 and high income countries. *International Journal of Infectious Diseases* 2018;**73**:140.  
50 361 doi:10.1016/j.ijid.2018.04.3731  
51  
52  
53  
54  
55  
56  
57  
58  
59  
60

- 1  
2  
3 362 23 World Health Organization. *Antimicrobial stewardship interventions: a practical guide*. Copenhagen:  
4 363 : WHO Regional Office for Europe 2021.  
5  
6 364 24 Cox JA, Vlieghe E, Mendelson M, *et al*. Antibiotic stewardship in low- and middle-income countries:  
7 365 the same but different? *Clinical microbiology and infection : the official publication of the European*  
8 366 *Society of Clinical Microbiology and Infectious Diseases* 2017;**23**:812–8.  
9 367 doi:10.1016/J.CMI.2017.07.010  
10  
11  
12 368 25 Sangeda RZ, Kibona J, Munishi C, *et al*. Assessment of Implementation of Antimicrobial Resistance  
13 369 Surveillance and Antimicrobial Stewardship Programs in Tanzanian Health Facilities a Year After  
14 370 Launch of the National Action Plan. *Frontiers in public health* 2020;**8**.  
15 371 doi:10.3389/FPUBH.2020.00454  
16  
17 372 26 Khalfan MA, Sasi PG, Mugusi SF. The prevalence and pattern of antibiotic prescription among  
18 373 insured patients in Dar es Salaam Tanzania. *Pan African Medical Journal* 2021;**40**.  
19 374 doi:10.11604/PAMJ.2021.40.140.29584  
20  
21  
22 375 27 Irunde H, Minzi O, Moshiro C. Assessment of Rational Medicines Prescribing in Healthcare Facilities  
23 376 in Four Regions of Tanzania. *JPPCM* 2017;**3**:225–31. doi:10.5530/jppcm.2017.4.64  
24  
25 377 28 Kirkwood B, Sterne J. Calculation of required sample size. In: *Essentials of Medical Statistics*. 2003.  
26 378 413–24.  
27  
28 379 29 OpenEpi - Toolkit Shell for Developing New Applications.  
29 380 <http://www.openepi.com/Random/Random.htm> (accessed 16 Nov 2021).  
30  
31 381 30 Kilipamwambu A, Bwire GM, Myemba DT, *et al*. WHO/INRUD core prescribing indicators and  
32 382 antibiotic utilization patterns among primary health care facilities in Ilala district, Tanzania. *JAC-*  
33 383 *antimicrobial resistance* 2021;**3**. doi:10.1093/JACAMR/DLAB049  
34  
35  
36 384 31 Ahiabu MA, Tersbøl BP, Biritwum R, *et al*. A retrospective audit of antibiotic prescriptions in primary  
37 385 health-care facilities in Eastern Region, Ghana. *Health Policy and Planning* 2016;**31**:250–8.  
38 386 doi:10.1093/heapol/czv048  
39  
40 387 32 Shamsuddin S, Akkawi ME, Zaidi STR, *et al*. Antimicrobial drug use in primary healthcare clinics: a  
41 388 retrospective evaluation. *International Journal of Infectious Diseases* 2016;**52**:16–22.  
42 389 doi:10.1016/j.ijid.2016.09.013  
43  
44  
45 390 33 Ahmad A, Khan M, Malik S, *et al*. Prescription patterns and appropriateness of antibiotics in the  
46 391 management of cough/cold and diarrhea in a rural tertiary care teaching hospital. *Journal of*  
47 392 *Pharmacy And Bioallied Sciences* 2016;**8**:335. doi:10.4103/0975-7406.199340  
48  
49 393 34 Rogawski ET, Platts-Mills JA, Seidman JC, *et al*. Early Antibiotic Exposure in Low-resource Settings Is  
50 394 Associated with Increased Weight in the First Two Years of Life. *Journal of Pediatric*  
51 395 *Gastroenterology and Nutrition* 2017;**65**:350–6. doi:10.1097/MPG.0000000000001640  
52  
53 396 35 Sato D, Goto T, Uda K, *et al*. Impact of national guidelines for antimicrobial stewardship to reduce  
54 397 antibiotic use in upper respiratory tract infection and gastroenteritis. *Infection control and hospital*  
55 398 *epidemiology* 2021;**42**:280–6. doi:10.1017/ICE.2020.427  
56  
57  
58  
59  
60

- 1  
2  
3 399 36 Neuman MI, Hall M, Hersh AL, *et al.* Influence of hospital guidelines on management of children  
4 400 hospitalized with pneumonia. *Pediatrics* 2012;**130**:823–30. doi:10.1542/PEDS.2012-1285  
5  
6 401 37 Jenkins TC, Irwin A, Coombs L, *et al.* Effects of Clinical Pathways for Common Outpatient Infections  
7 402 on Antibiotic Prescribing. *The American journal of medicine* 2013;**126**:327.  
8 403 doi:10.1016/J.AMJMED.2012.10.027  
9  
10 404 38 Foolad F, Nagel JL, Eschenauer G, *et al.* Disease-based antimicrobial stewardship: A review of active  
11 405 and passive approaches to patient management. *Journal of Antimicrobial Chemotherapy*  
12 406 2017;**72**:3232–44. doi:10.1093/jac/dkx266  
13  
14  
15 407 39 Liu C, Liu C, Wang D, *et al.* Intrinsic and external determinants of antibiotic prescribing: A multi-level  
16 408 path analysis of primary care prescriptions in Hubei, China. *Antimicrobial Resistance and Infection*  
17 409 *Control* 2019;**8**. doi:10.1186/s13756-019-0592-5  
18  
19 410 40 Roumie CL, Halasa NB, Edwards KM, *et al.* Differences in antibiotic prescribing among physicians,  
20 411 residents, and nonphysician clinicians. *American Journal of Medicine* 2005;**118**:641–8.  
21 412 doi:10.1016/j.amjmed.2005.02.013  
22  
23 413 41 Doron S, Davidson LE. Antimicrobial Stewardship. *Mayo Clinic Proceedings* 2011;**86**:1113.  
24 414 doi:10.4065/MCP.2011.0358  
25  
26 415 42 Regev-Yochay G, Raz M, Dagan R, *et al.* Reduction in Antibiotic Use Following a Cluster Randomized  
27 416 Controlled Multifaceted Intervention: The Israeli Judicious Antibiotic Prescription Study. *Clinical*  
28 417 *Infectious Diseases* 2011;**53**:33–41. doi:10.1093/CID/CIR272  
29  
30 418 43 Weiss K, Blais R, Fortin A, *et al.* Impact of a Multipronged Education Strategy on Antibiotic  
31 419 Prescribing in Quebec, Canada. *Clinical Infectious Diseases* 2011;**53**:433–9. doi:10.1093/CID/CIR409  
32  
33 420 44 Bagga B, Stultz JS, Arnold S, *et al.* A Culture Change: Impact of a Pediatric Antimicrobial Stewardship  
34 421 Program Based on Guideline Implementation and Prospective Audit with Feedback. *Antibiotics*  
35 422 (*Basel, Switzerland*) 2021;**10**. doi:10.3390/antibiotics10111307  
36  
37 423 45 Probst V, Islamovic F, Mirza A. Antimicrobial stewardship program in pediatric medicine. *Pediatric*  
38 424 *investigation* 2021;**5**:229–38. doi:10.1002/ped4.12292  
39  
40 425 46 Mohlala G, Peltzer K, Phaswana-Mafuya N, *et al.* Drug prescription habits in public and private  
41 426 health facilities in 2 provinces in South Africa. *Eastern Mediterranean Health Journal* 2010;**16**:324–8.  
42 427 doi:10.26719/2010.16.3.324  
43  
44 428 47 *Integrated Management of Childhood Illness*. Geneva: : World Health Organization 2005.  
45 429 <http://apps.who.int/iris/bitstream/10665/42939/1/924154644>  
46  
47 430 48 *The Treatment of diarrhea: a manual for physicians and other senior health workers*. 4th revision.  
48 431 Geneva: : World Health Organization 2005. doi:10.1097/00007611-192408000-00004  
49  
50 432 49 Luisa M, Amore CD, Ceradini J, *et al.* Prevalence of antibiotic use in a tertiary care hospital in Italy ,  
51 433 2008 – 2016. *Italian Journal of Pediatrics* 2019;**7**:1–8.  
52  
53  
54  
55  
56  
57  
58  
59  
60



- 1  
2  
3 434 50 Okoro RN, Nmeka C, Erah PO. Antibiotics prescription pattern and determinants of utilization in the  
4 435 national health insurance scheme at a tertiary hospital in Nigeria. *African Health Sciences*  
5 436 2019;**19**:2356–64. doi:10.4314/ahs.v19i3.8  
6  
7 437 51 Novan P, Primadi A, Mahfudz M, *et al.* Comparison of antibiotic prescriptions in adults and children  
8 438 with upper respiratory tract infections in Bangka Tengah primary health care centers Abstract :  
9 439 *Journal of Basic and Clinical Pharmacology* 2020;**30**:1–4. doi:10.1515/jbcpp-2019-0248  
10  
11  
12 440 52 Seni J, Mapunjo SG, Wittenauer R, *et al.* Antimicrobial use across six referral hospitals in Tanzania: a  
13 441 point prevalence survey. *BMJ Open* 2020;**10**. doi:10.1136/bmjopen-2020-042819  
14  
15 442 53 Beckett CL, Harbarth S, Huttner B. Special considerations of antibiotic prescription in the geriatric  
16 443 population. *Clinical Microbiology and Infection*. 2015;**21**:3. doi:10.1016/j.cmi.2014.08.018  
17  
18 444 54 Donà D, Barbieri E, Daverio M, *et al.* Implementation and impact of pediatric antimicrobial  
19 445 stewardship programs: a systematic scoping review. *Antimicrobial Resistance and Infection Control*  
20 446 2020;**9**. doi:10.1186/s13756-019-0659-3  
21  
22  
23 447 55 Kinoshita N, Komura M, Tsuzuki S, *et al.* The effect of preauthorization and prospective audit and  
24 448 feedback system on oral antimicrobial prescription for outpatients at a children’s hospital in Japan.  
25 449 *Journal of Infection and Chemotherapy* 2020;**26**:582–7. doi:10.1016/j.jiac.2020.01.013  
26  
27 450 56 Branstetter JW, Barker L, Yarbrough A, *et al.* Challenges of Antibiotic Stewardship in the Pediatric  
28 451 and Neonatal Intensive Care Units. *The journal of pediatric pharmacology and therapeutics : JPPT :*  
29 452 *the official journal of PPAG* 2021;**26**:659–68. doi:10.5863/1551-6776-26.7.659  
30

31 453

34 454 Figure 1. Receipt of an antibiotic prescription by age group

37 455 Figure 2. Receipt of an antibiotic prescription by the level of health facility

40 456 Figure 3. Receipt an antibiotic prescription by prescriber qualification

42 457  
43  
44  
45  
46  
47  
48  
49  
50  
51  
52  
53  
54  
55  
56  
57  
58  
59  
60

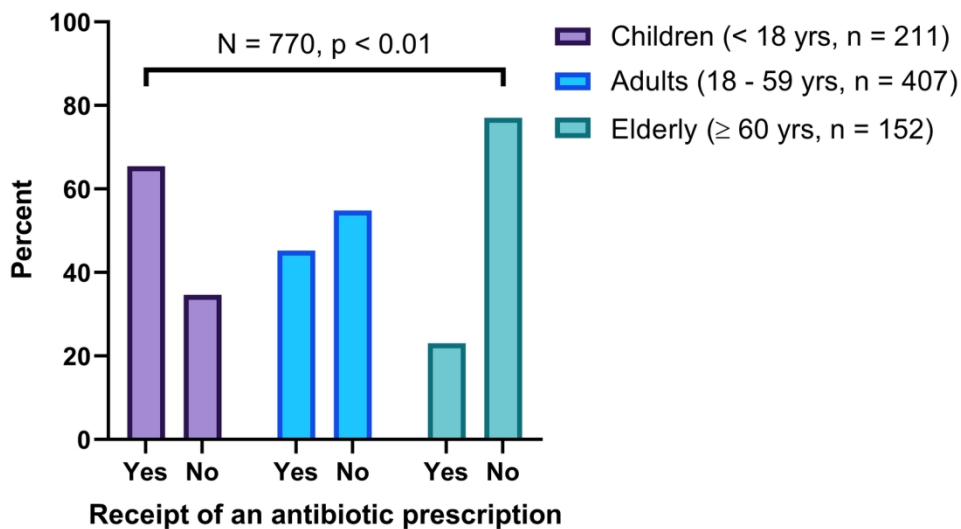

Figure 1. Receipt of an antibiotic prescription by age group

152x88mm (300 x 300 DPI)



1  
2  
3  
4  
5  
6  
7  
8  
9  
10  
11  
12  
13  
14  
15  
16  
17  
18  
19  
20  
21  
22  
23  
24  
25  
26  
27  
28  
29  
30  
31  
32  
33  
34  
35  
36  
37  
38  
39  
40  
41  
42  
43  
44  
45  
46  
47  
48  
49  
50  
51  
52  
53  
54  
55  
56  
57  
58  
59  
60

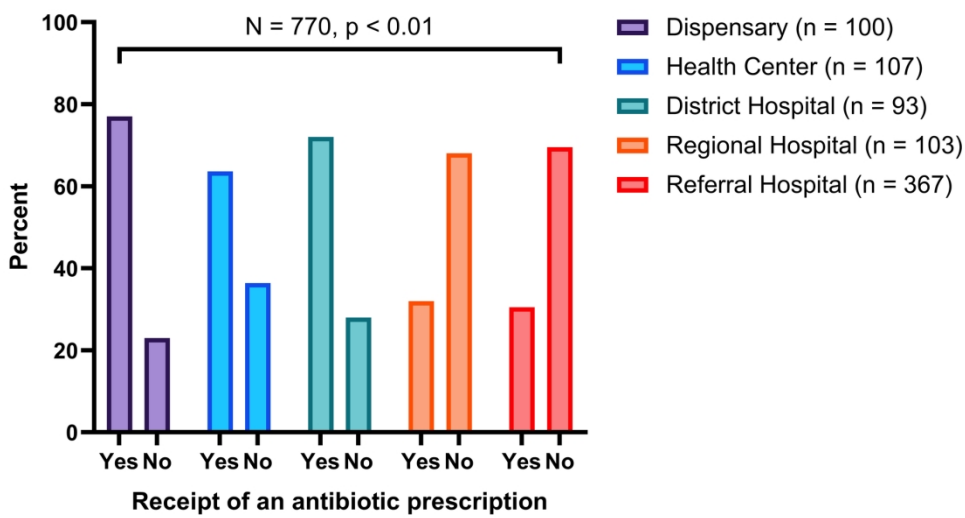

Figure 2. Receipt of an antibiotic prescription by the level of health facility

173x96mm (300 x 300 DPI)

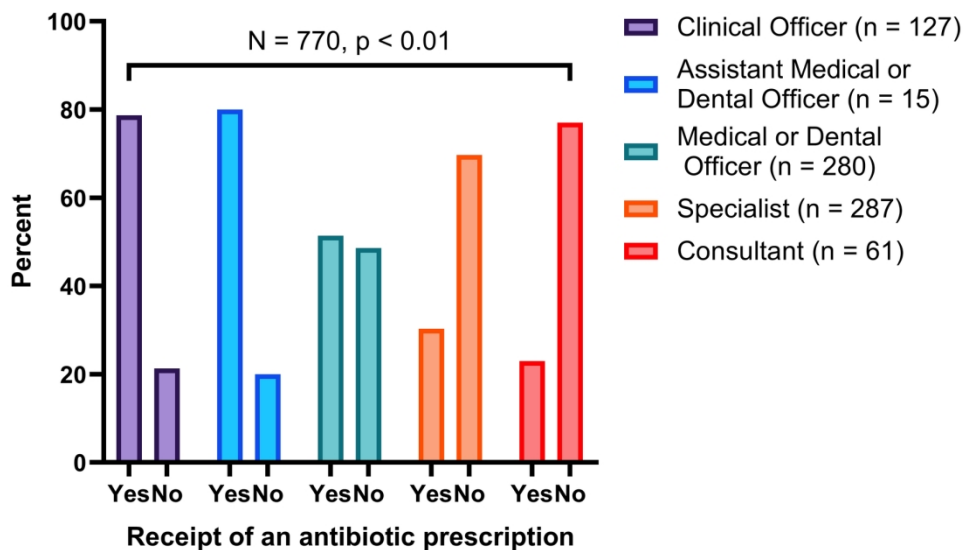

Figure 3. Receipt an antibiotic prescription by prescriber qualification

160x96mm (300 x 300 DPI)

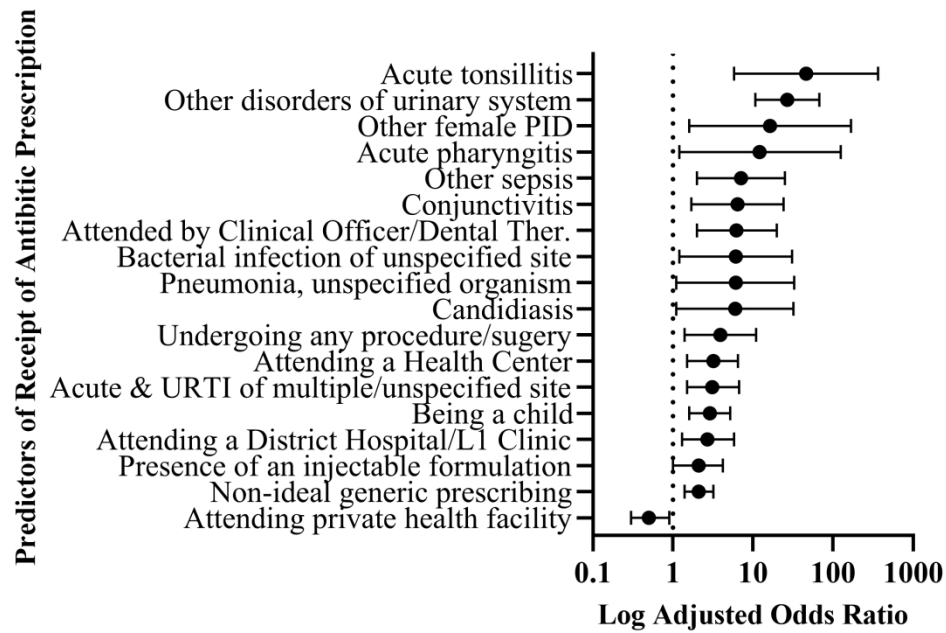

Figure 4: A forest plot of log-adjusted odds ratios for receipt of an antibiotic prescription

218x143mm (300 x 300 DPI)

**Supplement 1: Frequency distribution of all study variables**

| <b>Characteristic</b>                                               | <b>n (%)</b> |
|---------------------------------------------------------------------|--------------|
| <b>Age in years (N = 993)</b>                                       |              |
| Mean (SD) = 36.3 (23.2), Median = 37.0                              |              |
| Children (< 18 years)                                               | 264 (26.6)   |
| Adults (18-59 years)                                                | 535 (53.9)   |
| Elderly ( $\geq$ 60 years)                                          | 194 (19.5)   |
| <b>Sex (N = 993)</b>                                                |              |
| Male                                                                | 412 (41.5)   |
| Female                                                              | 581 (58.5)   |
| <b>Level of health facility (N = 993)</b>                           |              |
| Dispensary                                                          | 102 (10.3)   |
| Health Centre/Stand-alone clinic by Assistant Dental Officer        | 119 (12.0)   |
| District Hospital/Clinic Level1 by Medical/Dental Officer           | 101 (10.2)   |
| Regional Hospital/Clinic Level 2 by specialist                      | 123 (12.4)   |
| Referral/National/Zonal Hospital/Clinic Level 3 by super specialist | 548 (55.2)   |
| <b>Ownership of health facility (N = 993)</b>                       |              |
| Public                                                              | 468 (47.1)   |
| Private/Nongovernmental                                             | 525 (52.9)   |
| <b>Department visited (N = 993)</b>                                 |              |
| Outpatient                                                          | 975 (98.2)   |
| Inpatient                                                           | 18 (1.8)     |
| <b>Diagnosis code (N = 993)</b>                                     |              |
| Other disorders of urinary system                                   | 102 (10.3)   |
| Essential (primary) hypertension                                    | 81 (8.2)     |
| Acute and URTI of multiple and unspecified sites                    | 65 (6.5)     |
| Type 2 diabetes mellitus                                            | 51 (5.1)     |
| Spondylosis                                                         | 42 (4.2)     |
| Hypertensive Heart Disease                                          | 42 (4.2)     |
| Gastritis and duodenitis                                            | 39 (3.9)     |
| Disorders of lipoprotein metabolism and other lipidemias            | 36 (3.6)     |
| Pain, not elsewhere classified                                      | 33 (3.3)     |
| Iron deficiency anaemia                                             | 31 (3.1)     |
| Dermatophytosis                                                     | 31 (3.1)     |
| Vasomotor and allergic rhinitis                                     | 27 (2.7)     |
| Atopic dermatitis                                                   | 27 (2.7)     |
| Other sepsis                                                        | 25 (2.5)     |

Key; RefH, Referral Hospital, L1C, Level 1 Clinic; L2C, Level 2 Clinic

**Supplement 1: Frequency distribution of all study variables (continued)**

| <b>Characteristic (N = 993)</b>                                       | <b>n (%)</b> |
|-----------------------------------------------------------------------|--------------|
| Iron deficiency anaemia                                               | 31 (3.1)     |
| Dermatophytosis                                                       | 31 (3.1)     |
| Vasomotor and allergic rhinitis                                       | 27 (2.7)     |
| Atopic dermatitis                                                     | 27 (2.7)     |
| Other sepsis                                                          | 25 (2.5)     |
| Acute nasopharyngitis (common cold)                                   | 24 (2.4)     |
| Acute tonsillitis                                                     | 24 (2.4)     |
| Asthma                                                                | 23 (2.3)     |
| Malaria, unspecified                                                  | 23 (2.3)     |
| PUD, site unspecified                                                 | 22 (2.2)     |
| Chronic kidney disease                                                | 18 (1.8)     |
| Complications of analgesics, antipyretics and anti-inflammatory drugs | 18 (1.8)     |
| Plasmodium falciparum                                                 | 16 (1.6)     |
| Conjunctivitis                                                        | 16 (1.6)     |
| Diseases of pulp and periapical tissues                               | 17 (1.7)     |
| Cough                                                                 | 16 (1.6)     |
| Hookworm disease                                                      | 14 (1.4)     |
| Candidiasis                                                           | 14 (1.4)     |
| Other vitamin deficiency                                              | 14 (1.4)     |
| Chronic diseases of tonsils and adenoids                              | 14 (1.4)     |
| Other joint disorders, not elsewhere classified                       | 14 (1.4)     |
| Gonarthrosis (arthrosis of knee)                                      | 13 (1.3)     |
| Supervision of normal pregnancy                                       | 13 (1.3)     |
| Dental caries                                                         | 13 (1.3)     |
| Bacterial infection of unspecified site                               | 11 (1.1)     |
| Deficiency of other nutrient elements                                 | 11 (1.1)     |
| Pneumonia, unspecified organism                                       | 11 (1.1)     |
| Other deforming dorsopathies                                          | 11 (1.1)     |
| Epilepsy                                                              | 10 (1.0)     |
| Cystitis                                                              | 10 (1.0)     |
| Chronic viral hepatitis                                               | 10 (1.0)     |
| Acute bronchitis                                                      | 10 (1.0)     |
| Hyperplasia of prostate                                               | 10 (1.0)     |
| Deficiency of other B group vitamins                                  | 9 (0.9)      |

**Supplement 1: Frequency distribution of all study variables (Continued)**

| <b>Characteristic (N = 993)</b>                                        | <b>n (%)</b> |
|------------------------------------------------------------------------|--------------|
| Disorders of refraction and accommodation                              | 9 (0.9)      |
| Other arthritis                                                        | 8 (0.8)      |
| Headache                                                               | 9 (0.9)      |
| Ascariasis                                                             | 8 (0.8)      |
| Other disorders of fluid, electrolyte and acid-base balance            | 8 (0.8)      |
| Gingivitis and periodontal diseases                                    | 8 (0.8)      |
| Gastro-oesophageal reflux disease                                      | 8 (0.8)      |
| Gout                                                                   | 8 (0.8)      |
| Other female pelvic inflammatory diseases                              | 8 (0.8)      |
| Other disorders of bladder                                             | 7 (0.7)      |
| Amoebiasis                                                             | 7 (0.7)      |
| Other gastroenteritis and colitis of infectious and unspecified origin | 7 (0.7)      |
| Other anemias                                                          | 7 (0.7)      |
| Other hypothyroidism                                                   | 7 (0.7)      |
| Cardiomyopathy                                                         | 7 (0.7)      |
| Other functional intestinal disorders                                  | 7 (0.7)      |
| Allergic contact dermatitis                                            | 7 (0.7)      |
| Dorsalgia                                                              | 6 (0.6)      |
| Nerve root and plexus compressions in diseases classified elsewhere    | 6 (0.6)      |
| Malaise and fatigue                                                    | 6 (0.6)      |
| Other helminthiasis                                                    | 6 (0.6)      |
| Other superficial mycoses                                              | 6 (0.6)      |
| Type 1 diabetes mellitus                                               | 6 (0.6)      |
| Other polyneuropathies                                                 | 6 (0.6)      |
| Heart failure                                                          | 6 (0.6)      |
| Acute pharyngitis                                                      | 6 (0.6)      |
| Bacterial pneumonia, not elsewhere classified                          | 6 (0.6)      |
| Unspecified acute lower respiratory infection                          | 6 (0.6)      |
| Other diseases of upper respiratory tract                              | 6 (0.6)      |
| Cellulitis                                                             | 6 (0.6)      |
| Other disorders of external ear                                        | 6 (0.6)      |
| Unspecified intestinal parasitism                                      | 5 (0.5)      |
| Malignant neoplasm of the breast                                       | 5 (0.5)      |
| Leiomyoma of the uterus                                                | 5 (0.5)      |
| Inflammatory polyneuropathy                                            | 5 (0.5)      |

**Supplement 1: Frequency distribution of all study variables (continued)**

| <b>Characteristic (N = 993)</b>                                | <b>n (%)</b> |
|----------------------------------------------------------------|--------------|
| Glaucoma                                                       | 5 (0.5)      |
| Secondary hypertension                                         | 5 (0.5)      |
| Other diseases of hard tissues of teeth                        | 5 (0.5)      |
| Irritable bowel syndrome                                       | 5 (0.5)      |
| Arthrosis of first carpometacarpal joint                       | 5 (0.5)      |
| Other disorders of muscle                                      | 5 (0.5)      |
| Excessive vomiting in pregnancy                                | 5 (0.5)      |
| Nausea and vomiting                                            | 5 (0.5)      |
| Infections of genitourinary tract in pregnancy                 | 4 (0.4)      |
| Varicella (chickenpox)                                         | 4 (0.4)      |
| Malignant neoplasm of the prostate                             | 4 (0.4)      |
| Sickle cell disorders                                          | 4 (0.4)      |
| Coagulation defect, unspecified                                | 4 (0.4)      |
| Cervical disc disorders                                        | 4 (0.4)      |
| Other retinal disorders                                        | 4 (0.4)      |
| Otitis externa                                                 | 4 (0.4)      |
| Disorders of vestibular function                               | 4 (0.4)      |
| Chronic ischemic heart disease                                 | 4 (0.4)      |
| Chronic rhinitis, nasopharyngitis and pharyngitis              | 4 (0.4)      |
| Dental facial anomalies (including malocclusion)               | 4 (0.4)      |
| Cutaneous abscess, furuncle and carbuncle                      | 4 (0.4)      |
| Other soft tissues disorders, not elsewhere classified         | 4 (0.4)      |
| Single delivery by caesarean section                           | 4 (0.4)      |
| Congenital malformation of cardiac septa                       | 4 (0.4)      |
| Abdominal and pelvic pain                                      | 4 (0.4)      |
| Open wound of the forearm                                      | 4 (0.4)      |
| Fever of other and unknown origin                              | 4 (0.4)      |
| Fracture of lower leg, including ankle                         | 4 (0.4)      |
| Dislocation, sprain and strain of joints and ligaments of knee | 4 (0.4)      |
| Other intervertebral disc disorders                            | 3 (0.3)      |
| Coxarthrosis (arthrosis of hip)                                | 3 (0.3)      |
| Polyarthrosis                                                  | 3 (0.3)      |
| Acne                                                           | 3 (0.3)      |
| Urticaria                                                      | 3 (0.3)      |
| Other parasitologically confirmed malaria                      | 3 (0.3)      |

**Supplement 1: Frequency distribution of all study variables (continued)**

| <b>Characteristic (N = 993)</b>                            | <b>n (%)</b> |
|------------------------------------------------------------|--------------|
| Trichomoniasis                                             | 3 (0.3)      |
| Other bacterial Intestinal Infections                      | 3 (0.3)      |
| Herpes Simplex Infection                                   | 3 (0.3)      |
| HIV disease resulting in infectious and parasitic diseases | 3 (0.3)      |
| Malignant neoplasm of colon                                | 3 (0.3)      |
| Malignant neoplasm of cervix uteri                         | 3 (0.3)      |
| Haemangioma and lymphangioma, any site                     | 3 (0.3)      |
| Thyrotoxicosis                                             | 3 (0.3)      |
| Vitamin D deficiency                                       | 3 (0.3)      |
| Disorders of mineral metabolism                            | 3 (0.3)      |
| Hereditary and idiopathic neuropathy                       | 3 (0.3)      |
| Senile cataract                                            | 3 (0.3)      |
| Duodenal ulcer                                             | 3 (0.3)      |
| Impetigo                                                   | 3 (0.3)      |
| Other dermatitis                                           | 3 (0.3)      |
| Internal derangement of knee                               | 3 (0.3)      |
| Osteomyelitis                                              | 3 (0.3)      |
| Acute renal failure                                        | 3 (0.3)      |
| Other general symptoms and signs                           | 3 (0.3)      |
| Other abnormal findings of blood chemistry                 | 3 (0.3)      |
| Presence of prosthetic heart valve                         | 3 (0.3)      |
| Fracture of femur                                          | 2 (0.2)      |
| Other dorsopathies, not elsewhere classified               | 2 (0.2)      |
| Other spondylopathies                                      | 2 (0.2)      |
| Psoriasis                                                  | 2 (0.2)      |
| Seborrheic dermatitis                                      | 2 (0.2)      |
| Diphyllobothriasis and sparganosis                         | 2 (0.2)      |
| Scabies                                                    | 2 (0.2)      |
| Streptococcal sepsis                                       | 2 (0.2)      |
| Miliary tuberculosis                                       | 2 (0.2)      |
| Typhoid and paratyphoid fevers                             | 2 (0.2)      |
| Unspecified HIV disease                                    | 2 (0.2)      |
| Viral infection of unspecified site                        | 2 (0.2)      |
| Myiasis                                                    | 2 (0.2)      |



**Supplement 1: Frequency distribution of all study variables (continued)**

| <b>Characteristic (N = 993)</b>                                                 | <b>n (%)</b> |
|---------------------------------------------------------------------------------|--------------|
| Streptococcus and staphylococcus as the cause of diseases classified elsewhere  | 2 (0.2)      |
| Other specified infectious agents as the cause of diseases classified elsewhere | 2 (0.2)      |
| Malignant neoplasm of esophagus                                                 | 2 (0.2)      |
| Malignant neoplasm of penis                                                     | 2 (0.2)      |
| Malignant neoplasm of thyroid gland                                             | 2 (0.2)      |
| Benign lipomatous neoplasm                                                      | 2 (0.2)      |
| Benign neoplasm of thyroid gland                                                | 2 (0.2)      |
| Vitamin B12 deficiency anemia                                                   | 2 (0.2)      |
| Other nutritional anemias                                                       | 2 (0.2)      |
| Purpura and other haemorrhagic conditions                                       | 2 (0.2)      |
| Other disorders of white blood cells                                            | 2 (0.2)      |
| Other specified diabetes mellitus                                               | 2 (0.2)      |
| Unspecified diabetes mellitus                                                   | 2 (0.2)      |
| Hyperprolactinemia                                                              | 2 (0.2)      |
| Disorders of purine and pyrimidine metabolism                                   | 2 (0.2)      |
| Schizophrenia                                                                   | 2 (0.2)      |
| Migraine                                                                        | 2 (0.2)      |
| Other headache syndromes                                                        | 2 (0.2)      |
| Disorders of autonomic nervous system                                           | 2 (0.2)      |
| Other inflammation of the eyelid                                                | 2 (0.2)      |
| Other disorders of conjunctiva                                                  | 2 (0.2)      |
| Nonsuppurative otitis media                                                     | 2 (0.2)      |
| Suppurative and unspecified otitis media                                        | 2 (0.2)      |
| Other rheumatic heart disease                                                   | 2 (0.2)      |
| Pulmonary embolism                                                              | 2 (0.2)      |
| Acute and subacute infective endocarditis                                       | 2 (0.2)      |
| Cerebral infarction                                                             | 2 (0.2)      |
| Stroke, not specified as hemorrhage or infarction                               | 2 (0.2)      |
| Other venous embolism and thrombosis                                            | 2 (0.2)      |
| Hemorrhoids                                                                     | 2 (0.2)      |
| Hypotension                                                                     | 2 (0.2)      |
| Acute sinusitis                                                                 | 2 (0.2)      |
| Pneumonia due to <i>H. influenza</i>                                            | 2 (0.2)      |
| Acute bronchiolitis                                                             | 2 (0.2)      |

**Supplement 1: Frequency distribution of all study variables (continued)**

| <b>Characteristic (N = 993)</b>                                                                     | <b>n (%)</b> |
|-----------------------------------------------------------------------------------------------------|--------------|
| Chronic sinusitis                                                                                   | 2 (0.2)      |
| Nasal polyp                                                                                         | 2 (0.2)      |
| Respiratory disorders in diseases classified elsewhere                                              | 2 (0.2)      |
| Gastric ulcer                                                                                       | 2 (0.2)      |
| Inguinal hernia                                                                                     | 2 (0.2)      |
| Umbilical hernia                                                                                    | 2 (0.2)      |
| Other diseases of the liver                                                                         | 2 (0.2)      |
| Pruritus                                                                                            | 2 (0.2)      |
| Nephrotic syndrome                                                                                  | 2 (0.2)      |
| Calculus of kidney and ureter                                                                       | 2 (0.2)      |
| Other disorders of kidney and ureter in diseases classified elsewhere                               | 2 (0.2)      |
| Urethral stricture                                                                                  | 2 (0.2)      |
| Excessive, frequent and irregular menstruation                                                      | 2 (0.2)      |
| Abnormal uterine and vaginal bleeding, unspecified                                                  | 2 (0.2)      |
| Female infertility                                                                                  | 2 (0.2)      |
| Threatened abortion                                                                                 | 2 (0.2)      |
| Perineal laceration during delivery                                                                 | 2 (0.2)      |
| Single spontaneous delivery                                                                         | 2 (0.2)      |
| Anaemia complicating pregnancy, childbirth and the puerperium                                       | 2 (0.2)      |
| Congenital malformation of the great arteries                                                       | 2 (0.2)      |
| Abnormalities of heart beat                                                                         | 2 (0.2)      |
| Other symptoms and signs involving the digestive system and abdomen                                 | 2 (0.2)      |
| Abnormal involuntary movements                                                                      | 2 (0.2)      |
| Dislocation, sprain and strain of joints and ligaments of lumbar spine and pelvis                   | 2 (0.2)      |
| Fracture of shoulder and upper arm                                                                  | 2 (0.2)      |
| Fracture of lower end of radius                                                                     | 2 (0.2)      |
| Dislocation of wrist                                                                                | 2 (0.2)      |
| Open wound of lower leg                                                                             | 2 (0.2)      |
| Poisoning by local antifungal, anti-infective and anti-inflammatory drugs, not elsewhere classified | 2 (0.2)      |
| Allergy, unspecified                                                                                | 2 (0.2)      |
| Supervision of high-risk pregnancy, unspecified                                                     | 2 (0.2)      |
| Health supervision and care of other healthy infant and child                                       | 2 (0.2)      |
| Spastic quadriplegic cerebral palsy                                                                 | 1 (0.1)      |
| Dengue fever (classical dengue)                                                                     | 1 (0.1)      |

---

**Supplement 1: Frequency distribution of all study variables (continued)**


---

| <b>Characteristic (N = 993)</b>                                                                                                                                   | <b>n (%)</b> |
|-------------------------------------------------------------------------------------------------------------------------------------------------------------------|--------------|
| Open wound of abdomen, lower back and pelvis                                                                                                                      | 1 (0.1)      |
| Sensorineural hearing loss, bilateral                                                                                                                             | 1 (0.1)      |
| Antenatal screening                                                                                                                                               | 1 (0.1)      |
| Pregnancy confirmed                                                                                                                                               | 1 (0.1)      |
| Contact with and exposure to communicable diseases                                                                                                                | 1 (0.1)      |
| Routine general health check-up of defined subpopulation                                                                                                          | 1 (0.1)      |
| Other medical procedures as the cause of abnormal reaction of the patient, or of later complication, without mention of misadventure at the time of the procedure | 1 (0.1)      |
| Hanging, strangulation and suffocation, undetermined intent                                                                                                       | 1 (0.1)      |
| Intentional self-harm by jumping from a high place                                                                                                                | 1 (0.1)      |
| Exposure to discharge of firework                                                                                                                                 | 1 (0.1)      |
| Poisoning by antihyperlipidaemic and antiarteriosclerotic drugs                                                                                                   | 1 (0.1)      |
| Poisoning by hormones and their synthetic substitutes and antagonists, not elsewhere classified                                                                   | 1 (0.1)      |
| Poisoning by antiviral drug                                                                                                                                       | 1 (0.1)      |
| Poisoning by antifungals and antibiotics, systemically used                                                                                                       | 1 (0.1)      |
| Corrosions classified according to extent of body surface involved                                                                                                | 1 (0.1)      |
| Burns classified according to extent of body surface involved                                                                                                     | 1 (0.1)      |
| Burn of first degree of wrist and hand                                                                                                                            | 1 (0.1)      |
| Injury of unspecified muscle and tendon of lower limb, level unspecified                                                                                          | 1 (0.1)      |
| Fracture of other toe                                                                                                                                             | 1 (0.1)      |
| Open wound of other parts of foot                                                                                                                                 | 1 (0.1)      |
| Superficial injury of hip and thigh, unspecified                                                                                                                  | 1 (0.1)      |
| Other and unspecified injuries of wrist and hand                                                                                                                  | 1 (0.1)      |
| Sprain and strain of wrist                                                                                                                                        | 1 (0.1)      |
| Superficial injury of wrist and hand                                                                                                                              | 1 (0.1)      |
| Injury of muscle(s) and tendon(s) of the rotator cuff                                                                                                             | 1 (0.1)      |
| Superficial injury of shoulder and upper arm                                                                                                                      | 1 (0.1)      |
| Fracture of lumbar spine and pelvis                                                                                                                               | 1 (0.1)      |
| Intracranial injury                                                                                                                                               | 1 (0.1)      |
| Fracture of skull and facial bones                                                                                                                                | 1 (0.1)      |
| Open wound of the head                                                                                                                                            | 1 (0.1)      |
| Intracranial space-occupying lesion                                                                                                                               | 1 (0.1)      |
| Symptoms and signs concerning fluid intake                                                                                                                        | 1 (0.1)      |
| Dizziness and giddiness                                                                                                                                           | 1 (0.1)      |

---

---

**Supplement 1: Frequency distribution of all study variables (continued)**


---

| <b>Characteristic (N = 993)</b>                                                      | <b>n (%)</b> |
|--------------------------------------------------------------------------------------|--------------|
| Unspecified urinary incontinence                                                     | 1 (0.1)      |
| Painful micturition, unspecified                                                     | 1 (0.1)      |
| Abnormalities of gait and mobility                                                   | 1 (0.1)      |
| Rash and other nonspecific skin eruption                                             | 1 (0.1)      |
| Other specified symptoms and signs involving the circulatory and respiratory systems | 1 (0.1)      |
| Hemorrhage from respiratory passages                                                 | 1 (0.1)      |
| Gangrene, not elsewhere classified                                                   | 1 (0.1)      |
| Congenital posterior urethral valves                                                 | 1 (0.1)      |
| Polycystic kidney, unspecified                                                       | 1 (0.1)      |
| Congenital pulmonary valve stenosis                                                  | 1 (0.1)      |
| Congenital hydrocephalus                                                             | 1 (0.1)      |
| Hypoxic ischemic encephalopathy of newborn                                           | 1 (0.1)      |
| Maternal care for breach presentation                                                | 1 (0.1)      |
| Other specified pregnancy-related conditions                                         | 1 (0.1)      |
| Pre-eclampsia                                                                        | 1 (0.1)      |
| Pre-existing hypertension, complicating pregnancy, childbirth and the puerperium     | 1 (0.1)      |
| Blighted ovum and nonhydatiform mole                                                 | 1 (0.1)      |
| Habitual aborter                                                                     | 1 (0.1)      |
| Complete or unspecified abortion without complication                                | 1 (0.1)      |
| Secondary dysmenorrhea                                                               | 1 (0.1)      |
| Other inflammatory disorders of vagina                                               | 1 (0.1)      |
| Endometriosis                                                                        | 1 (0.1)      |
| Female pelvic inflammatory disorders in diseases classified elsewhere                | 1 (0.1)      |
| Inflammatory disorders of the breast                                                 | 1 (0.1)      |
| Impotence of organic origin                                                          | 1 (0.1)      |
| Redundant prepuce, phimosis and paraphimosis                                         | 1 (0.1)      |
| Orchitis and epididymitis                                                            | 1 (0.1)      |
| Hydrocele and spermatocele                                                           | 1 (0.1)      |
| Inflammatory diseases of the prostate                                                | 1 (0.1)      |
| Urethral disorders in diseases classified elsewhere                                  | 1 (0.1)      |
| Urethral caruncle                                                                    | 1 (0.1)      |
| Urethritis and urethral syndrome                                                     | 1 (0.1)      |
| Unspecified renal colic                                                              | 1 (0.1)      |
| Unspecified kidney failure                                                           | 1 (0.1)      |

---

---

**Supplement 1: Frequency distribution of all study variables (continued)**


---

| <b>Characteristic (N =993)</b>                                                                       | <b>n (%)</b> |
|------------------------------------------------------------------------------------------------------|--------------|
| Obstructive and reflux uropathy                                                                      | 1 (0.1)      |
| Hydronephrosis with ureteral stricture, not elsewhere classified                                     | 1 (0.1)      |
| Chronic nephritic syndrome                                                                           | 1 (0.1)      |
| Periprosthetic fracture around internal prosthetic joint                                             | 1 (0.1)      |
| Other disorders of bone density and structure                                                        | 1 (0.1)      |
| Short Achilles tendon (acquired)                                                                     | 1 (0.1)      |
| Spontaneous rupture of synovium and tendon                                                           | 1 (0.1)      |
| Discitis, unspecified                                                                                | 1 (0.1)      |
| Other acquired deformities of limbs                                                                  | 1 (0.1)      |
| Acquired deformities of fingers and toes                                                             | 1 (0.1)      |
| Arthrosis, unspecified                                                                               | 1 (0.1)      |
| Other specific arthropathies                                                                         | 1 (0.1)      |
| Seropositive rheumatoid arthritis                                                                    | 1 (0.1)      |
| Ulcer of lower limb, not elsewhere classified                                                        | 1 (0.1)      |
| Lichen planus                                                                                        | 1 (0.1)      |
| Unspecified contact dermatitis due to other chemical products                                        | 1 (0.1)      |
| Other local infection of skin and subcutaneous tissue                                                | 1 (0.1)      |
| Pilonidal cyst without abscess                                                                       | 1 (0.1)      |
| Cholelithiasis                                                                                       | 1 (0.1)      |
| Alcoholic hepatic failure                                                                            | 1 (0.1)      |
| Malignant neoplasm of rectum                                                                         | 1 (0.1)      |
| Malignant neoplasm of stomach                                                                        | 1 (0.1)      |
| Malignant neoplasm of liver and intrahepatic bile ducts                                              | 1 (0.1)      |
| Malignant neoplasm of other and ill-defined sites in the respiratory system and intrathoracic organs | 1 (0.1)      |
| HIV disease resulting in other specified diseases                                                    | 1 (0.1)      |
| Foodborne staphylococcal intoxication                                                                | 1 (0.1)      |
| Rotaviral enteritis                                                                                  | 1 (0.1)      |
| Other and unspecified syphilis                                                                       | 1 (0.1)      |
| Chlamydial infection of lower genitourinary tract                                                    | 1 (0.1)      |
| Anogenital herpesviral infection, unspecified                                                        | 1 (0.1)      |
| Anogenital (venereal) warts                                                                          | 1 (0.1)      |
| Unspecified sexually transmitted disease                                                             | 1 (0.1)      |
| Enteroviral exanthematous fever                                                                      | 1 (0.1)      |
| Other mosquito-borne viral fevers                                                                    | 1 (0.1)      |

---

---

**Supplement 1: Frequency distribution of all study variables (continued)**


---

| <b>Characteristic (N = 993)</b>                                                                    | <b>n (%)</b> |
|----------------------------------------------------------------------------------------------------|--------------|
| Measles without complications                                                                      | 1 (0.1)      |
| Other viral infections characterized by skin and mucous membrane lesions, not elsewhere classified | 1 (0.1)      |
| Unspecified viral hepatitis without hepatic coma                                                   | 1 (0.1)      |
| Subcutaneous phaeomycotic abscess and cyst                                                         | 1 (0.1)      |
| Other cestode infections                                                                           | 1 (0.1)      |
| Onchocerciasis                                                                                     | 1 (0.1)      |
| Strongyloidiasis                                                                                   | 1 (0.1)      |
| Trichiuriasis                                                                                      | 1 (0.1)      |
| Enterobiasis                                                                                       | 1 (0.1)      |
| Sequelae of tuberculosis                                                                           | 1 (0.1)      |
| Malignant neoplasm of the palate                                                                   | 1 (0.1)      |
| Malignant neoplasm of the tonsil, unspecified                                                      | 1 (0.1)      |
| Malignant neoplasm of piriform sinus                                                               | 1 (0.1)      |
| Malignant neoplasm of hypopharynx, unspecified                                                     | 1 (0.1)      |
| Malignant neoplasm of the bone and articular cartilage, unspecified                                | 1 (0.1)      |
| Kaposi sarcoma                                                                                     | 1 (0.1)      |
| Malignant neoplasm of peripheral nerves of lower limb, including hip                               | 1 (0.1)      |
| Malignant neoplasm of ovary                                                                        | 1 (0.1)      |
| Malignant neoplasm of the testis                                                                   | 1 (0.1)      |
| Malignant neoplasm of the kidney, except renal pelvis                                              | 1 (0.1)      |
| Malignant (primary) neoplasm, unspecified                                                          | 1 (0.1)      |
| Hodgkin lymphoma                                                                                   | 1 (0.1)      |
| Non-follicular lymphoma                                                                            | 1 (0.1)      |
| Mediastinal (thymic) large B-cell lymphoma                                                         | 1 (0.1)      |
| Other specified types T/NK-cell lymphoma                                                           | 1 (0.1)      |
| Chronic lymphocytic leukemia of B-cell type                                                        | 1 (0.1)      |
| Benign neoplasm of mouth and pharynx                                                               | 1 (0.1)      |
| Benign neoplasm of parotid gland                                                                   | 1 (0.1)      |
| Other benign neoplasms of connective and other soft tissue                                         | 1 (0.1)      |
| Benign neoplasm of the breast                                                                      | 1 (0.1)      |
| Benign neoplasm of the prostate                                                                    | 1 (0.1)      |
| Benign neoplasm of the brain and other parts of the central nervous system                         | 1 (0.1)      |
| Benign neoplasm of other and unspecified endocrine glands                                          | 1 (0.1)      |
| Folate deficiency anemia                                                                           | 1 (0.1)      |

---

---

**Supplement 1: Frequency distribution of all study variables (continued)**


---

| <b>Characteristic (N = 993)</b>                                     | <b>n (%)</b> |
|---------------------------------------------------------------------|--------------|
| Iodine-deficiency-related (endemic) goiter, unspecified             | 1 (0.1)      |
| Polycystic ovarian syndrome                                         | 1 (0.1)      |
| Vitamin A deficiency, unspecified                                   | 1 (0.1)      |
| Niacin deficiency (pellagra)                                        | 1 (0.1)      |
| Ascorbic acid deficiency                                            | 1 (0.1)      |
| Dietary calcium deficiency                                          | 1 (0.1)      |
| Lipid storage disorder, unspecified                                 | 1 (0.1)      |
| Mental and behavioral disorders due to use of alcohol               | 1 (0.1)      |
| Schizotypal disorder                                                | 1 (0.1)      |
| Mild depressive episode                                             | 1 (0.1)      |
| Recurrent depressive disorder                                       | 1 (0.1)      |
| Unspecified mental retardation                                      | 1 (0.1)      |
| Secondary parkinsonism, unspecified                                 | 1 (0.1)      |
| Essential tremor                                                    | 1 (0.1)      |
| Other demyelinating diseases of central nervous system              | 1 (0.1)      |
| Nerve root and plexus disorder, unspecified                         | 1 (0.1)      |
| Diabetic polyneuropathy                                             | 1 (0.1)      |
| Other specified disorders of brain in diseases classified elsewhere | 1 (0.1)      |
| Other disorders of nervous system in diseases classified elsewhere  | 1 (0.1)      |
| Disorders of lacrimal system                                        | 1 (0.1)      |
| Disorders of orbit                                                  | 1 (0.1)      |
| Chorioretinal inflammation                                          | 1 (0.1)      |
| Diabetic retinopathy                                                | 1 (0.1)      |
| Disorders of globe                                                  | 1 (0.1)      |
| Optic atrophy                                                       | 1 (0.1)      |
| Otitis externa in mycoses                                           | 1 (0.1)      |
| Hearing loss, unspecified                                           | 1 (0.1)      |
| Hypertensive heart and renal disease                                | 1 (0.1)      |
| Angina pectoris                                                     | 1 (0.1)      |
| Other nonrheumatic mitral valve disorders                           | 1 (0.1)      |
| Endocarditis, valve unspecified                                     | 1 (0.1)      |
| Other conduction disorders                                          | 1 (0.1)      |
| Other cardiac arrhythmias                                           | 1 (0.1)      |
| Other cerebrovascular diseases                                      | 1 (0.1)      |
| Abdominal aortic aneurysm, ruptured                                 | 1 (0.1)      |

---

**Supplement 1: Frequency distribution of all study variables (continued)**

| <b>Characteristic (N = 993)</b>                                           | <b>n (%)</b> |
|---------------------------------------------------------------------------|--------------|
| Phlebitis and thrombophlebitis of femoral vein                            | 1 (0.1)      |
| Post procedural disorders of circulatory system, not elsewhere classified | 1 (0.1)      |
| Influenza due to identified seasonal influenza virus                      | 1 (0.1)      |
| Influenza, virus not identified                                           | 1 (0.1)      |
| Pneumonia due to other specified infectious organisms                     | 1 (0.1)      |
| Peritonsillar abscess                                                     | 1 (0.1)      |
| Unspecified chronic bronchitis                                            | 1 (0.1)      |
| Status asthmaticus                                                        | 1 (0.1)      |
| Hypersensitivity pneumonitis due to organic dust                          | 1 (0.1)      |
| Pneumonitis due to solids and liquids                                     | 1 (0.1)      |
| Adult respiratory distress syndrome                                       | 1 (0.1)      |
| Other disorders of tooth development                                      | 1 (0.1)      |
| Impacted teeth                                                            | 1 (0.1)      |
| Disorders of teeth and supporting structures, unspecified                 | 1 (0.1)      |
| Other cysts of jaw                                                        | 1 (0.1)      |
| Other diseases of jaws                                                    | 1 (0.1)      |
| Other diseases of lip and oral mucosa                                     | 1 (0.1)      |
| Esophagitis                                                               | 1 (0.1)      |
| Functional dyspepsia                                                      | 1 (0.1)      |
| Acute appendicitis                                                        | 1 (0.1)      |
| Incisional hernia without obstruction or gangrene                         | 1 (0.1)      |
| Other abdominal hernia                                                    | 1 (0.1)      |
| Ulcerative (chronic) pancolitis                                           | 1 (0.1)      |
| Other specified noninfective gastroenteritis and colitis                  | 1 (0.1)      |
| Anal fissure, unspecified                                                 | 1 (0.1)      |
| Anorectal fistula                                                         | 1 (0.1)      |
| Chronic hepatitis, not elsewhere classified                               | 1 (0.1)      |
| <b>Any Procedure/Surgery done (N = 993)</b>                               |              |
| No                                                                        | 940 (94.7)   |
| Yes                                                                       | 53 (5.3)     |
| <b>Type of Procedure/Surgery (N = 53)</b>                                 |              |
| Minor                                                                     | 25 (47.2)    |
| Major                                                                     | 7 (13.2)     |
| Specialized                                                               | 21 (39.6)    |



---

**Supplement 1: Frequency distribution of all study variables (continued)**


---

| Characteristic                                                     | n (%)      |
|--------------------------------------------------------------------|------------|
| <b>Length of stay in days (n = 17)</b>                             |            |
| Mean (SD) = 6.1 (5.7), Median = 3                                  |            |
| 1                                                                  | 3 (17.6)   |
| 2                                                                  | 4 (23.5)   |
| 3                                                                  | 2 (11.8)   |
| 5                                                                  | 1 (5.9)    |
| 6                                                                  | 1 (5.9)    |
| 7                                                                  | 1 (5.9)    |
| 8                                                                  | 1 (5.9)    |
| 14                                                                 | 2 (11.8)   |
| 15                                                                 | 1 (5.9)    |
| 18                                                                 | 1 (5.9)    |
| <b>Prescriber Qualification (N = 993)</b>                          |            |
| Clinical Officer/Dental Therapist                                  | 132 (13.3) |
| Assistant Medical/Dental Officer                                   | 18 (1.8)   |
| Medical/Dental Officer                                             | 320 (32.2) |
| Specialist                                                         | 437 (44.0) |
| Super-specialist/Consultant                                        | 86 (8.7)   |
| <b>Prescriber Qualification Grouped (N = 993)</b>                  |            |
| Low level (Clinical Officers or Assistant Medical/Dental Officers) | 150 (15.1) |
| Mid-level (Doctor of Medicine/Doctor of Dental Surgery)            | 320 (32.2) |
| High level (Specialists/Consultants)                               | 523 (52.7) |
| <b>Any Medication Prescribed (N = 993)</b>                         |            |
| No                                                                 | 223 (22.5) |
| Yes                                                                | 770 (77.5) |
| <b>Number of Medications in the prescription (N = 770)</b>         |            |
| Mean (SD) = 3.0 (1.7), Median = 3.0                                |            |
| 1                                                                  | 117 (15.2) |
| 2                                                                  | 209 (27.1) |
| 3                                                                  | 212 (27.5) |
| 4                                                                  | 118 (15.3) |
| 5                                                                  | 55 (7.1)   |
| 6                                                                  | 39 (5.1)   |
| 7                                                                  | 11 (1.4)   |
| 8                                                                  | 6 (0.8)    |
| 10                                                                 | 2 (0.3)    |

| <b>Supplement 1: Frequency distribution of all study variables (continued)</b>                     |              |
|----------------------------------------------------------------------------------------------------|--------------|
| <b>Characteristic (N = 770)</b>                                                                    | <b>n (%)</b> |
| 13                                                                                                 | 1 (0.1)      |
| <b>Polypharmacy of &gt; 3 Medications</b>                                                          |              |
| No                                                                                                 | 538 (69.9)   |
| Yes                                                                                                | 232 (30.1)   |
| <b>Polypharmacy of <math>\geq</math> 5 Medications</b>                                             |              |
| No                                                                                                 | 657 (85.3)   |
| Yes                                                                                                | 113 (14.7)   |
| <b>Receipt of an antibiotic prescription (N = 770)</b>                                             |              |
| No                                                                                                 | 413 (53.6)   |
| Yes                                                                                                | 357 (46.4)   |
| <b>Receipt of more than one antibiotic prescription (N = 357)</b>                                  |              |
| No                                                                                                 | 286 (80.1)   |
| Yes                                                                                                | 70 (19.6)    |
| <b>Antibiotics prescribed according to TZ STG2017 recommendation with respect to HFL (N = 357)</b> |              |
| No                                                                                                 | 28 (7.8)     |
| Yes                                                                                                | 329 (92.2)   |

**Supplement 2: Study characteristics by receipt of antibiotic prescription**

| <b>Characteristic (N = 770)</b>                         | <b>Antibiotic prescription, n (%)</b> |            | <b>P value</b> |
|---------------------------------------------------------|---------------------------------------|------------|----------------|
|                                                         | <b>No</b>                             | <b>Yes</b> |                |
| <b>Age in years</b>                                     |                                       |            |                |
| Children (< 18 years)                                   | 73 (34.6)                             | 138 (65.4) | < 0.01         |
| Adults (18-59 years)                                    | 223 (54.8)                            | 184 (45.2) |                |
| Elderly (≥ 60 years)                                    | 117 (77.0)                            | 35 (23.0)  |                |
| <b>Sex</b>                                              |                                       |            |                |
| Male                                                    | 165 (52.2)                            | 151 (47.8) | 0.51           |
| Female                                                  | 248 (54.6)                            | 206 (45.4) |                |
| <b>Level of health facility</b>                         |                                       |            |                |
| Dispensary                                              | 23 (23.0)                             | 77 (77.0)  | < 0.01         |
| Health Centre/Stand-alone clinic by ADO                 | 39 (36.4)                             | 68 (63.6)  |                |
| District Hospital/Clinic L1 by MO/DO                    | 26 (28.0)                             | 67 (72.0)  |                |
| Regional Hospital/Clinic L2 by specialist               | 70 (68.0)                             | 33 (32.0)  |                |
| Referral/National/Zonal Hospital/Clinic L3 by SS        | 255 (69.5)                            | 112 (30.5) |                |
| <b>Ownership of health facility</b>                     |                                       |            |                |
| Public                                                  | 195 (62.7)                            | 116 (37.3) | < 0.01         |
| Private/Non-governmental                                | 218 (47.5)                            | 241 (52.5) |                |
| <b>Department visited</b>                               |                                       |            |                |
| Outpatient                                              | 408 (54.2)                            | 345 (45.8) | 0.04           |
| Inpatient                                               | 5 (29.4)                              | 12 (70.6)  |                |
| <b>Select Diagnosis</b>                                 |                                       |            |                |
| <b>Other disorders of urinary system</b>                |                                       |            |                |
| No                                                      | 407 (60.3)                            | 268 (39.7) | < 0.01         |
| Yes                                                     | 6 (6.3)                               | 89 (93.7)  |                |
| <b>Acute and URTI of multiple and unspecified sites</b> |                                       |            |                |
| No                                                      | 400 (56.7)                            | 306 (43.3) | < 0.01         |
| Yes                                                     | 13 (20.3)                             | 51 (79.7)  |                |
| <b>Other sepsis</b>                                     |                                       |            |                |
| No                                                      | 409 (54.8)                            | 338 (45.2) | < 0.01*        |
| Yes                                                     | 4 (17.4)                              | 19 (82.6)  |                |
| <b>Acute tonsillitis</b>                                |                                       |            |                |
| No                                                      | 412 (55.2)                            | 334 (44.8) | < 0.01*        |
| Yes                                                     | 1 (4.2)                               | 23 (95.8)  |                |

p-values are from Pearson Chi-Square Test or Fisher's Exact Test (\*); SS, Super Specialist

| <b>Supplement 2: Study characteristics by receipt of antibiotic prescription (Continued)</b> |                                       |            |                |
|----------------------------------------------------------------------------------------------|---------------------------------------|------------|----------------|
| <b>Characteristic (N = 770)</b>                                                              | <b>Antibiotic prescription, n (%)</b> |            | <b>P value</b> |
|                                                                                              | <b>No</b>                             | <b>Yes</b> |                |
| <b>Diseases of pulp and periapical tissues</b>                                               |                                       |            |                |
| No                                                                                           | 413 (54.3)                            | 347 (45.7) | < 0.01*        |
| Yes                                                                                          | 0 (0.0)                               | 10 (100.0) |                |
| <b>Candidiasis</b>                                                                           |                                       |            |                |
| No                                                                                           | 411 (54.4)                            | 345 (45.6) | 0.01           |
| Yes                                                                                          | 2 (14.3)                              | 12 (85.7)  |                |
| <b>Bacterial infection of unspecified site</b>                                               |                                       |            |                |
| No                                                                                           | 411 (54.2)                            | 348 (45.8) | 0.03*          |
| Yes                                                                                          | 2 (18.2)                              | 9 (81.8)   |                |
| <b>Pneumonia, unspecified organism</b>                                                       |                                       |            |                |
| No                                                                                           | 411 (54.1)                            | 349 (45.9) | 0.05*          |
| Yes                                                                                          | 2 (20.0)                              | 8 (80.0)   |                |
| <b>Cystitis</b>                                                                              |                                       |            |                |
| No                                                                                           | 413 (54.3)                            | 348 (45.7) | < 0.01*        |
| Yes                                                                                          | 0 (0.0)                               | 9 (100.0)  |                |
| <b>Other female pelvic inflammatory diseases</b>                                             |                                       |            |                |
| No                                                                                           | 412 (54.0)                            | 351 (46.0) | 0.05*          |
| Yes                                                                                          | 1 (14.3)                              | 6 (85.7)   |                |
| <b>Other disorders of bladder</b>                                                            |                                       |            |                |
| No                                                                                           | 413 (54.1)                            | 350 (45.9) | < 0.01*        |
| Yes                                                                                          | 0 (0.0)                               | 7 (100.0)  |                |
| <b>Amoebiasis</b>                                                                            |                                       |            |                |
| No                                                                                           | 413 (54.1)                            | 350 (45.9) | < 0.01*        |
| Yes                                                                                          | 0 (0.0)                               | 7 (100.0)  |                |
| <b>Cellulitis</b>                                                                            |                                       |            |                |
| No                                                                                           | 413 (53.9)                            | 353 (46.1) | 0.05*          |
| Yes                                                                                          | 0 (0.0)                               | 4 (100.0)  |                |
| <b>Infections of genitourinary tract in pregnancy</b>                                        |                                       |            |                |
| No                                                                                           | 413 (53.9)                            | 353 (46.1) | 0.05*          |
| Yes                                                                                          | 0 (0.0)                               | 4 (100.0)  |                |
| <b>Chronic rhinitis, nasopharyngitis and pharyngitis</b>                                     |                                       |            |                |
| No                                                                                           | 413 (53.9)                            | 353 (46.1) | 0.05*          |
| Yes                                                                                          | 0 (0.0)                               | 4 (100.0)  |                |

p-values are from Pearson Chi-Square Test or Fisher's Exact Test (\*)

| <b>Supplement 2: Study characteristics by receipt of antibiotic prescription (Continued)</b> |                                       |            |                |
|----------------------------------------------------------------------------------------------|---------------------------------------|------------|----------------|
| <b>Characteristic (N = 770)</b>                                                              | <b>Antibiotic prescription, n (%)</b> |            | <b>P value</b> |
|                                                                                              | <b>No</b>                             | <b>Yes</b> |                |
| <b>Cutaneous abscess, furuncle and carbuncle</b>                                             |                                       |            |                |
| No                                                                                           | 413 (53.9)                            | 353 (46.1) | 0.05*          |
| Yes                                                                                          | 0 (0.0)                               | 4 (100.0)  |                |
| <b>Other gastroenteritis and colitis of infectious and unspecified origin</b>                |                                       |            |                |
| No                                                                                           | 412 (54.0)                            | 351 (46.0) | 0.05*          |
| Yes                                                                                          | 1 (14.3)                              | 6 (85.7)   |                |
| <b>Acute nasopharyngitis (common cold)</b>                                                   |                                       |            |                |
| No                                                                                           | 404 (54.1)                            | 343 (45.9) | 0.16           |
| Yes                                                                                          | 9 (39.1)                              | 14 (60.9)  |                |
| <b>Conjunctivitis</b>                                                                        |                                       |            |                |
| No                                                                                           | 408 (54.0)                            | 347 (46.0) | 0.11           |
| Yes                                                                                          | 5 (33.3)                              | 10 (66.7)  |                |
| <b>Cough</b>                                                                                 |                                       |            |                |
| No                                                                                           | 408 (54.1)                            | 346 (45.9) | 0.07           |
| Yes                                                                                          | 5 (31.3)                              | 11 (68.8)  |                |
| <b>Gingivitis and periodontal diseases</b>                                                   |                                       |            |                |
| No                                                                                           | 412 (53.9)                            | 353 (46.1) | 0.19*          |
| Yes                                                                                          | 1 (20.0)                              | 4 (80.0)   |                |
| <b>Acute pharyngitis</b>                                                                     |                                       |            |                |
| No                                                                                           | 412 (53.9)                            | 352 (46.1) | 0.10*          |
| Yes                                                                                          | 1 (16.7)                              | 5 (83.3)   |                |
| <b>Bacterial pneumonia, not elsewhere classified</b>                                         |                                       |            |                |
| No                                                                                           | 412 (53.9)                            | 352 (46.1) | 0.10*          |
| Yes                                                                                          | 1 (16.7)                              | 5 (83.3)   |                |
| <b>Unspecified acute lower respiratory infection</b>                                         |                                       |            |                |
| No                                                                                           | 412 (53.9)                            | 353 (46.1) | 0.19*          |
| Yes                                                                                          | 1 (20.0)                              | 4 (80.0)   |                |
| <b>Other diseases of upper respiratory tract</b>                                             |                                       |            |                |
| No                                                                                           | 412 (53.9)                            | 352 (46.1) | 0.10*          |
| Yes                                                                                          | 1 (16.7)                              | 5 (83.3)   |                |

p-values are from Pearson Chi-Square Test or Fisher's Exact Test (\*)

**Supplement 2: Study characteristics by receipt of antibiotic prescription (Continued)**

| Characteristic (N = 770)                                      | Antibiotic prescription, n (%) |            | P value     |
|---------------------------------------------------------------|--------------------------------|------------|-------------|
|                                                               | No                             | Yes        |             |
| <b>Otitis externa</b>                                         |                                |            |             |
| No                                                            | 413 (53.8)                     | 354 (46.2) | 0.10*       |
| Yes                                                           | 0 (0.0)                        | 3 (100.0)  |             |
| <b>Single delivery by caesarean section</b>                   |                                |            |             |
| No                                                            | 413 (53.8)                     | 354 (46.2) | 0.10*       |
| Yes                                                           | 0 (0.0)                        | 3 (100.0)  |             |
| <b>Abdominal and pelvic pain</b>                              |                                |            |             |
| No                                                            | 413 (53.8)                     | 355 (46.2) | 0.22*       |
| Yes                                                           | 0 (0.0)                        | 2 (100.0)  |             |
| <b>Impetigo</b>                                               |                                |            |             |
| No                                                            | 413 (53.8)                     | 354 (46.2) | 0.10*       |
| Yes                                                           | 0 (0.0)                        | 3 (100.0)  |             |
| <b>Osteomyelitis</b>                                          |                                |            |             |
| No                                                            | 413 (53.8)                     | 355 (46.2) | 0.22*       |
| Yes                                                           | 0 (0.0)                        | 2 (100.0)  |             |
| <b>Non-suppurative otitis media</b>                           |                                |            |             |
| No                                                            | 413 (53.8)                     | 355 (46.2) | 0.22*       |
| Yes                                                           | 0 (0.0)                        | 2 (100.0)  |             |
| <b>Suppurative and unspecified otitis media</b>               |                                |            |             |
| No                                                            | 413 (53.8)                     | 355 (46.2) | 0.22*       |
| Yes                                                           | 0 (0.0)                        | 2 (100.0)  |             |
| <b>Acute sinusitis</b>                                        |                                |            |             |
| No                                                            | 413 (53.8)                     | 355 (46.2) | 0.22*       |
| Yes                                                           | 0 (0.0)                        | 2 (100.0)  |             |
| <b>Respiratory disorders in diseases classified elsewhere</b> |                                |            |             |
| No                                                            | 413 (53.8)                     | 355 (46.2) | 0.22*       |
| Yes                                                           | 0 (0.0)                        | 2 (100.0)  |             |
| <b>Dislocation of wrist</b>                                   |                                |            |             |
| No                                                            | 413 (53.8)                     | 355 (46.2) | 0.22*       |
| Yes                                                           | 0 (0.0)                        | 2 (100.0)  |             |
| <b>Any Procedure/Surgery done</b>                             |                                |            |             |
| No                                                            | 403 (54.4)                     | 338 (45.6) | <b>0.04</b> |
| Yes                                                           | 10 (34.5)                      | 19 (65.5)  |             |

p-values are from Pearson Chi-Square Test or Fisher's Exact Test (\*)

**Supplement 2: Study characteristics by receipt of antibiotic prescription (Continued)**

| Characteristic                                                                | Antibiotic prescription, n (%) |            | P value |
|-------------------------------------------------------------------------------|--------------------------------|------------|---------|
|                                                                               | No                             | Yes        |         |
| <b>Type of Procedure/Surgery (N = 29)</b>                                     |                                |            |         |
| Minor                                                                         | 4 (40.0)                       | 6 (60.0)   | 0.71*   |
| Major                                                                         | 0 (0.0)                        | 7 (100.0)  |         |
| Specialized                                                                   | 6 (50.0)                       | 6 (50.0)   |         |
| <b>Prescriber Qualification (N = 770)</b>                                     |                                |            |         |
| Clinical Officer/ Dental Therapist                                            | 27 (21.3)                      | 100 (78.7) | < 0.01* |
| Assistant Medical Officer/Assistant Dental Officer                            | 3 (20.0)                       | 12 (80.0)  |         |
| Medical Officer/Dental Officer                                                | 136 (48.6)                     | 144 (51.4) |         |
| Specialist                                                                    | 200 (69.7)                     | 87 (30.3)  |         |
| Super-specialist/Consultant                                                   | 47 (77.0)                      | 14 (23.0)  |         |
| <b>Prescriber Qualification Grouped (N = 770)</b>                             |                                |            |         |
| Low level (Clinical Officer/DT/AMO/ADO)                                       | 30 (21.1)                      | 112 (78.9) | < 0.01  |
| Mid-level (Medical/Dental Officer)                                            | 136 (48.9)                     | 144 (51.4) |         |
| High level (Specialists/Consultants)                                          | 247 (71.0)                     | 101 (29.0) |         |
| <b>Polypharmacy of ≥ 5 Medications (N = 770)</b>                              |                                |            |         |
| No                                                                            | 346 (52.6)                     | 312 (47.4) | 0.16    |
| Yes                                                                           | 67 (59.8)                      | 45 (40.2)  |         |
| <b>Availability of all medications prescribed in 2017 TZ NEMLIT (N = 770)</b> |                                |            |         |
| No                                                                            | 220 (72.6)                     | 83 (27.4)  | < 0.01  |
| Yes                                                                           | 193 (41.3)                     | 274 (58.7) |         |
| <b>All medications prescribed using their generic names (N = 770)</b>         |                                |            |         |
| No                                                                            | 171 (48.9)                     | 179 (51.1) | 0.02    |
| Yes                                                                           | 242 (57.6)                     | 178 (42.4) |         |
| <b>Was malaria treatment prescribed (N = 770)</b>                             |                                |            |         |
| No                                                                            | 407 (54.2)                     | 344 (45.8) | 0.05    |
| Yes                                                                           | 6 (31.6)                       | 13 (68.4)  |         |
| <b>Presence of injectable formulation in the prescription (N = 770)</b>       |                                |            |         |
| No                                                                            | 388 (55.0)                     | 317 (45.0) | 0.01    |
| Yes                                                                           | 25 (38.5)                      | 40 (61.5)  |         |

p-values are from Pearson Chi-Square Test or Fisher's Exact Test (\*); DT, Dental Therapist; AMO, Assistant Medical Officer; ADO, Assistant Dental Officer

### Supplement 3: Binary Logistic Regression analysis of predictors of receipt of antibiotic prescription

| Variable (N = 770)                                            | Univariate Regression |         | Multivariate Regression |         |
|---------------------------------------------------------------|-----------------------|---------|-------------------------|---------|
|                                                               | cOR* (95% CI)         | P value | aOR** (95% CI)          | P value |
| <b>Age in years</b>                                           |                       |         |                         |         |
| Elderly (≥ 60 years)                                          | 1 [Ref.]              |         | 1 [Ref.]                |         |
| Children (< 18 years)                                         | 6.3 (3.9-10.1)        | < 0.01  | 2.9 (1.6-5.2)           | < 0.01  |
| Adults (18-59 years)                                          | 2.8 (1.8-4.2)         | < 0.01  | 1.7 (1.0-2.8)           | 0.06    |
| <b>Level of health facility</b>                               |                       |         |                         |         |
| Referral Hospital/Clinic L4 by SS                             | 1 [Ref.]              |         | 1 [Ref.]                |         |
| Dispensary                                                    | 7.6 (4.6-12.8)        | < 0.01  | 1.4 (0.5-3.8)           | 0.56    |
| Health Centre/Stand-alone clinic by ADO                       | 4.0 (2.5-6.2)         | < 0.01  | 3.2 (1.5-6.5)           | < 0.01  |
| District Hospital/Clinic L1 by MO/DO                          | 5.9 (3.5-9.7)         | < 0.01  | 2.7 (1.3-5.8)           | 0.01    |
| Regional Hospital/Clinic L2 by Specialist                     | 1.1 (0.7-1.7)         | 0.87    | 1.1 (0.6-2.2)           | 0.70    |
| <b>Ownership of health facility</b>                           |                       |         |                         |         |
| Public                                                        | 1 [Ref.]              |         | 1 [Ref.]                |         |
| Private/Non-governmental                                      | 1.9 (1.4-2.5)         | < 0.01  | 0.5 (0.3-0.9)           | 0.01    |
| <b>Department visited</b>                                     |                       |         |                         |         |
| Outpatient                                                    | 1 [Ref.]              |         | 1 [Ref.]                |         |
| Inpatient                                                     | 2.8 (1.0-8.1)         | 0.05    | 2.9 (0.8-11.1)          | 0.12    |
| <b>Any Procedure/Surgery done</b>                             |                       |         |                         |         |
| No                                                            | 1 [Ref.]              |         | 1 [Reference]           |         |
| Yes                                                           | 2.3 (1.0-4.9)         | 0.04    | 3.9 (1.4-10.9)          | 0.01    |
| <b>Prescriber Qualification</b>                               |                       |         |                         |         |
| Super-specialist/Consultant                                   | 1 [Ref.]              |         | 1 [Ref.]                |         |
| Clinical Officer/Dental Therapist                             | 12.4 (6.0-25.9)       | < 0.01  | 6.2 (2.0-19.8)          | < 0.01  |
| Assistant Medical/Dental Officer                              | 13.4 (3.3-54.4)       | < 0.01  | 4.3 (0.8-24.3)          | 0.09    |
| Medical/Dental Officer                                        | 3.6 (1.9-6.7)         | < 0.01  | 2.2 (0.9-5.3)           | 0.07    |
| Specialist                                                    | 1.5 (0.8-2.8)         | 0.25    | 1.4 (0.6-3.1)           | 0.45    |
| <b>All medications prescribed using their generic names</b>   |                       |         |                         |         |
| Yes                                                           | 1 [Ref.]              |         | 1 [Ref.]                |         |
| No                                                            | 1.4 (1.1 - 1.9)       | 0.02    | 2.1 (1.4 - 3.2)         | < 0.01  |
| <b>Was malaria treatment prescribed</b>                       |                       |         |                         |         |
| No                                                            | 1 [Ref.]              |         | 1 [Ref.]                |         |
| Yes                                                           | 2.6 (1.0-6.8)         | 0.06    | 1.3 (0.3-4.6)           | 0.73    |
| <b>Presence of injectable formulation in the prescription</b> |                       |         |                         |         |
| No                                                            | 1 [Ref.]              |         | 1 [Ref.]                |         |
| Yes                                                           | 2.0 (1.2-3.3)         | 0.01    | 2.1 (1.0-4.2)           | 0.04    |

\*cOR, Crude Odds Ratio; \*\*aOR, Adjusted Odds Ratio; CI, Confidence Interval, AMO, Assistant Medical Officer; ADO, Assistant Dental Officer; MO, Medical Officer; SS, Super-specialist



**Supplement 3: Binary Logistic Regression analysis of predictors of receipt of antibiotic prescription (Continued)**

| Variable (N = 770)                                                                  | Univariate Regression |         | Multivariate Regression |         |
|-------------------------------------------------------------------------------------|-----------------------|---------|-------------------------|---------|
|                                                                                     | cOR* (95% CI)         | P value | aOR** (95% CI)          | P value |
| <b>Select Diagnostic Codes</b>                                                      |                       |         |                         |         |
| <b>Other disorders of urinary system - N39</b>                                      |                       |         |                         |         |
| No                                                                                  | 1 [Ref.]              |         | 1 [Ref.]                |         |
| Yes                                                                                 | 22.5 (9.7-52.2)       | < 0.01  | 26.8 (10.7-67.3)        | < 0.01  |
| <b>Acute and URTI of multiple and unspecified sites - J06</b>                       |                       |         |                         |         |
| No                                                                                  | 1 [Ref.]              |         | 1 [Ref.]                |         |
| Yes                                                                                 | 5.1 (2.7-9.6)         | < 0.01  | 3.1 (1.5-6.7)           | < 0.01  |
| <b>Other sepsis - A41</b>                                                           |                       |         |                         |         |
| No                                                                                  | 1 [Ref.]              |         | 1 [Reference]           |         |
| Yes                                                                                 | 5.7 (1.9-17.1)        | < 0.01  | 7.1 (2.0-25.0)          | < 0.01  |
| <b>Acute tonsillitis - J03</b>                                                      |                       |         |                         |         |
| No                                                                                  | 1 [Ref.]              |         | 1 [Ref.]                |         |
| Yes                                                                                 | 28.4 (3.8-211.2)      | < 0.01  | 46.1 (5.8-364.4)        | < 0.01  |
| <b>Candidiasis - B37</b>                                                            |                       |         |                         |         |
| No                                                                                  | 1 [Ref.]              |         | 1 [Ref.]                |         |
| Yes                                                                                 | 7.1 (1.6-32.2)        | 0.01    | 6.0 (1.1-32.0)          | 0.04    |
| <b>Bacterial infection of unspecified site - A49</b>                                |                       |         |                         |         |
| No                                                                                  | 1 [Ref.]              |         | 1 [Ref.]                |         |
| Yes                                                                                 | 5.3 (1.1-24.8)        | 0.03    | 6.1 (1.2-30.8)          | 0.03    |
| <b>Pneumonia, unspecified organism - J18</b>                                        |                       |         |                         |         |
| No                                                                                  | 1 [Ref.]              |         | 1 [Ref.]                |         |
| Yes                                                                                 | 4.7 (1.0-22.3)        | 0.05    | 6.1 (1.1-32.7)          | 0.04    |
| <b>Other female pelvic inflammatory diseases - N73</b>                              |                       |         |                         |         |
| No                                                                                  | 1 [Ref.]              |         | 1 [Ref.]                |         |
| Yes                                                                                 | 7.0 (0.8-58.8)        | 0.07    | 16.3 (1.6-167.2)        | 0.02    |
| <b>Other gastroenteritis and colitis of infectious and unspecified origin - A09</b> |                       |         |                         |         |
| No                                                                                  | 1 [Ref.]              |         | 1 [Ref.]                |         |
| Yes                                                                                 | 7.0 (0.8-58.8)        | 0.07    | 7.7 (0.6-99.3)          | 0.12    |
| <b>Gingivitis and periodontal disease - K05</b>                                     |                       |         |                         |         |
| No                                                                                  | 1 [Ref.]              |         | 1 [Ref.]                |         |
| Yes                                                                                 | 4.7 (0.5-42.0)        | 0.17    | 5.6 (0.5-61.3)          | 0.16    |
| <b>Cough - R05</b>                                                                  |                       |         |                         |         |
| No                                                                                  | 1 [Ref.]              |         | 1 [Ref.]                |         |
| Yes                                                                                 | 2.6 (0.9-7.5)         | 0.08    | 0.8 (0.2-3.4)           | 0.79    |

\*cOR, Crude Odds Ratio; \*\*aOR, Adjusted Odds Ratio; CI, Confidence Interval

**Supplement 3: Binary Logistic Regression analysis of predictors of receipt of antibiotic prescription (Continued)**

| Variable (N = 770)                                             | Univariate Regression |         | Multivariate Regression |         |
|----------------------------------------------------------------|-----------------------|---------|-------------------------|---------|
|                                                                | cOR* (95% CI)         | P value | aOR** (95% CI)          | P value |
| <b>Conjunctivitis - H10</b>                                    |                       |         |                         |         |
| No                                                             | 1 [Ref.]              |         | 1 [Ref.]                |         |
| Yes                                                            | 2.4 (0.8-6.9)         | 0.12    | 6.4 (1.7-24.1)          | 0.01    |
| <b>Amoebiasis - A06</b>                                        |                       |         |                         |         |
| No                                                             | 1 [Ref.]              |         | 1 [Ref.]                |         |
| Yes                                                            | 1906260340            | 1.00    | Not entered             | NA      |
| <b>Otitis Externa – H60</b>                                    |                       |         |                         |         |
| No                                                             | 1 [Ref.]              |         | 1 [Ref.]                |         |
| Yes                                                            | 1884720675            | 1.00    | Not entered             | NA      |
| <b>Acute nasopharyngitis (common cold) - J00</b>               |                       |         |                         |         |
| No                                                             | 1 [Ref.]              |         | 1 [Ref.]                |         |
| Yes                                                            | 1.8 (0.8-4.3)         | 0.16    | 0.7 (0.2-2.1)           | 0.49    |
| <b>Acute pharyngitis – J02</b>                                 |                       |         |                         |         |
| No                                                             | 1 [Ref.]              |         | 1 [Ref.]                |         |
| Yes                                                            | 5.9 (0.7-50.3)        | 0.11    | 12.1 (1.2-124.7)        | 0.04    |
| <b>Bacterial pneumonia not elsewhere classified - J15</b>      |                       |         |                         |         |
| No                                                             | 1 [Ref.]              |         | 1 [Ref.]                |         |
| Yes                                                            | 5.9 (0.7-50.3)        | 0.11    | 5.8 (0.4-90.2)          | 0.21    |
| <b>Unspecified acute lower respiratory infection - J22</b>     |                       |         |                         |         |
| No                                                             | 1 [Ref.]              |         | 1 [Ref.]                |         |
| Yes                                                            | 4.7 (0.5-42.0)        | 0.17    | 2.9 (0.2-39.7)          | 0.43    |
| <b>Chronic rhinitis, nasopharyngitis and pharyngitis - J31</b> |                       |         |                         |         |
| No                                                             | 1 [Ref.]              |         | 1 [Ref.]                |         |
| Yes                                                            | 1890059827            | 0.99    | Not entered             | NA      |
| <b>Other diseases of upper respiratory tract - J39</b>         |                       |         |                         |         |
| No                                                             | 1 [Ref.]              |         | 1 [Ref.]                |         |
| Yes                                                            | 5.9 (0.7-50.3)        | 0.11    | 4.9 (0.5-51.7)          | 0.19    |
| <b>Disease of the pulp and periapical tissues - K04</b>        |                       |         |                         |         |
| No                                                             | 1 [Ref.]              |         | 1 [Ref.]                |         |
| Yes                                                            | 1922740977            | 0.99    | Not entered             | NA      |
| <b>Impetigo - L01</b>                                          |                       |         |                         |         |
| No                                                             | 1 [Ref.]              |         | 1 [Ref.]                |         |
| Yes                                                            | 1884720675            | 0.99    | Not entered             | NA      |

\*cOR, Crude Odds Ratio; \*\*aOR, Adjusted Odds Ratio; CI, Confidence Interval

---

**Supplement 3: Binary Logistic Regression analysis of predictors of receipt of antibiotic prescription (Continued)**


---

| Variable (N = 770)                                          | Univariate Regression |         | Multivariate Regression |         |
|-------------------------------------------------------------|-----------------------|---------|-------------------------|---------|
|                                                             | cOR* (95% CI)         | P value | aOR** (95% CI)          | P value |
| <b>Cutaneous abscess, furuncle and carbuncle - L02</b>      |                       |         |                         |         |
| No                                                          | 1 [Ref.]              |         | 1 [Ref.]                |         |
| Yes                                                         | 1890059827            | 0.99    | Not entered             | NA      |
| <b>Cellulitis - L03</b>                                     |                       |         |                         |         |
| No                                                          | 1 [Ref.]              |         | 1 [Ref.]                |         |
| Yes                                                         | 1890059827            | 0.99    | Not entered             | NA      |
| <b>Cystitis - N30</b>                                       |                       |         |                         |         |
| No                                                          | 1 [Ref.]              |         | 1 [Ref.]                |         |
| Yes                                                         | 1917215861            | 0.99    | Not entered             | NA      |
| <b>Other disorders of bladder - N32</b>                     |                       |         |                         |         |
| No                                                          | 1 [Ref.]              |         | 1 [Ref.]                |         |
| Yes                                                         | 1906260340            | 0.99    | Not entered             | NA      |
| <b>Infections of genitourinary tract in pregnancy - O23</b> |                       |         |                         |         |
| No                                                          | 1 [Ref.]              |         | 1 [Ref.]                |         |
| Yes                                                         | 1890059827            | 0.99    | Not entered             | NA      |
| <b>Single delivery by caesarean section - O82</b>           |                       |         |                         |         |
| No                                                          | 1 [Ref.]              |         | 1 [Ref.]                |         |
| Yes                                                         | 1884720675            | 0.99    | Not entered             | NA      |

\*cOR, Crude Odds Ratio; \*\*aOR, Adjusted Odds Ratio; CI, Confidence Interval

**STROBE 2007 (v4) Statement—Checklist of items that should be included in reports of *cross-sectional studies***

| Section/Topic                | Item # | Recommendation                                                                                                                                                                       | Reported on page # |
|------------------------------|--------|--------------------------------------------------------------------------------------------------------------------------------------------------------------------------------------|--------------------|
| <b>Title and abstract</b>    | 1      | (a) Indicate the study's design with a commonly used term in the title or the abstract                                                                                               | 1                  |
|                              |        | (b) Provide in the abstract an informative and balanced summary of what was done and what was found                                                                                  | 2                  |
| <b>Introduction</b>          |        |                                                                                                                                                                                      |                    |
| Background/rationale         | 2      | Explain the scientific background and rationale for the investigation being reported                                                                                                 | 3                  |
| Objectives                   | 3      | State specific objectives, including any prespecified hypotheses                                                                                                                     | 4                  |
| <b>Methods</b>               |        |                                                                                                                                                                                      |                    |
| Study design                 | 4      | Present key elements of study design early in the paper                                                                                                                              | 4                  |
| Setting                      | 5      | Describe the setting, locations, and relevant dates, including periods of recruitment, exposure, follow-up, and data collection                                                      | 4, 5               |
| Participants                 | 6      | (a) Give the eligibility criteria, and the sources and methods of selection of participants                                                                                          | 5                  |
| Variables                    | 7      | Clearly define all outcomes, exposures, predictors, potential confounders, and effect modifiers. Give diagnostic criteria, if applicable                                             | 5                  |
| Data sources/<br>measurement | 8*     | For each variable of interest, give sources of data and details of methods of assessment (measurement). Describe comparability of assessment methods if there is more than one group | 5                  |
| Bias                         | 9      | Describe any efforts to address potential sources of bias                                                                                                                            | 5                  |
| Study size                   | 10     | Explain how the study size was arrived at                                                                                                                                            |                    |
| Quantitative variables       | 11     | Explain how quantitative variables were handled in the analyses. If applicable, describe which groupings were chosen and why                                                         | 5                  |
| Statistical methods          | 12     | (a) Describe all statistical methods, including those used to control for confounding                                                                                                | 5                  |
|                              |        | (b) Describe any methods used to examine subgroups and interactions                                                                                                                  | NA                 |
|                              |        | (c) Explain how missing data were addressed                                                                                                                                          | 5                  |
|                              |        | (d) If applicable, describe analytical methods taking account of sampling strategy                                                                                                   | NA                 |
|                              |        | (e) Describe any sensitivity analyses                                                                                                                                                | NA                 |
| <b>Results</b>               |        |                                                                                                                                                                                      |                    |

|                          |     |                                                                                                                                                                                                                                                                                                                                                                                                               |                      |
|--------------------------|-----|---------------------------------------------------------------------------------------------------------------------------------------------------------------------------------------------------------------------------------------------------------------------------------------------------------------------------------------------------------------------------------------------------------------|----------------------|
| Participants             | 13* | (a) Report numbers of individuals at each stage of study—eg numbers potentially eligible, examined for eligibility, confirmed eligible, included in the study, completing follow-up, and analysed<br>(b) Give reasons for non-participation at each stage<br>(c) Consider use of a flow diagram                                                                                                               | 6                    |
| Descriptive data         | 14* | (a) Give characteristics of study participants (eg demographic, clinical, social) and information on exposures and potential confounders<br>(b) Indicate number of participants with missing data for each variable of interest                                                                                                                                                                               | 6<br>NA              |
| Outcome data             | 15* | Report numbers of outcome events or summary measures                                                                                                                                                                                                                                                                                                                                                          | 6                    |
| Main results             | 16  | (a) Give unadjusted estimates and, if applicable, confounder-adjusted estimates and their precision (eg, 95% confidence interval). Make clear which confounders were adjusted for and why they were included<br>(b) Report category boundaries when continuous variables were categorized<br>(c) If relevant, consider translating estimates of relative risk into absolute risk for a meaningful time period | 9, 10, 11<br>7<br>NA |
| Other analyses           | 17  | Report other analyses done—eg analyses of subgroups and interactions, and sensitivity analyses                                                                                                                                                                                                                                                                                                                | NA                   |
| <b>Discussion</b>        |     |                                                                                                                                                                                                                                                                                                                                                                                                               |                      |
| Key results              | 18  | Summarise key results with reference to study objectives                                                                                                                                                                                                                                                                                                                                                      | 12                   |
| Limitations              | 19  | Discuss limitations of the study, taking into account sources of potential bias or imprecision. Discuss both direction and magnitude of any potential bias                                                                                                                                                                                                                                                    | 15                   |
| Interpretation           | 20  | Give a cautious overall interpretation of results considering objectives, limitations, multiplicity of analyses, results from similar studies, and other relevant evidence                                                                                                                                                                                                                                    | 12,13,14,15          |
| Generalisability         | 21  | Discuss the generalisability (external validity) of the study results                                                                                                                                                                                                                                                                                                                                         | 15                   |
| <b>Other information</b> |     |                                                                                                                                                                                                                                                                                                                                                                                                               |                      |
| Funding                  | 22  | Give the source of funding and the role of the funders for the present study and, if applicable, for the original study on which the present article is based                                                                                                                                                                                                                                                 | 2                    |

\*Give information separately for cases and controls in case-control studies and, if applicable, for exposed and unexposed groups in cohort and cross-sectional studies.

**Note:** An Explanation and Elaboration article discusses each checklist item and gives methodological background and published examples of transparent reporting. The STROBE checklist is best used in conjunction with this article (freely available on the Web sites of PLoS Medicine at <http://www.plosmedicine.org/>, Annals of Internal Medicine at <http://www.annals.org/>, and Epidemiology at <http://www.epidem.com/>). Information on the STROBE Initiative is available at [www.strobe-statement.org](http://www.strobe-statement.org).

# BMJ Open

## Factors Influencing Receipt of an Antibiotic Prescription Among Insured Patients in Tanzania: A Cross-sectional Study

|                                 |                                                                                                                                                                                                                                                                                                                                                                                             |
|---------------------------------|---------------------------------------------------------------------------------------------------------------------------------------------------------------------------------------------------------------------------------------------------------------------------------------------------------------------------------------------------------------------------------------------|
| Journal:                        | <i>BMJ Open</i>                                                                                                                                                                                                                                                                                                                                                                             |
| Manuscript ID                   | bmjopen-2022-062147.R1                                                                                                                                                                                                                                                                                                                                                                      |
| Article Type:                   | Original research                                                                                                                                                                                                                                                                                                                                                                           |
| Date Submitted by the Author:   | 26-Aug-2022                                                                                                                                                                                                                                                                                                                                                                                 |
| Complete List of Authors:       | Khalfan, Mohamed; Muhimbili University of Health and Allied Sciences, Department of Clinical Pharmacology, School of Medicine<br>Sasi, Philip ; Muhimbili University of Health and Allied Sciences, Department of Clinical Pharmacology, School of Medicine<br>Mugusi, Sabina ; Muhimbili University of Health and Allied Sciences, Department of Clinical Pharmacology, School of Medicine |
| <b>Primary Subject Heading</b>: | Pharmacology and therapeutics                                                                                                                                                                                                                                                                                                                                                               |
| Secondary Subject Heading:      | Infectious diseases, Public health                                                                                                                                                                                                                                                                                                                                                          |
| Keywords:                       | Public health < INFECTIOUS DISEASES, Clinical audit < HEALTH SERVICES ADMINISTRATION & MANAGEMENT, THERAPEUTICS, CLINICAL PHARMACOLOGY                                                                                                                                                                                                                                                      |
|                                 |                                                                                                                                                                                                                                                                                                                                                                                             |

SCHOLARONE™  
Manuscripts



I, the Submitting Author has the right to grant and does grant on behalf of all authors of the Work (as defined in the below author licence), an exclusive licence and/or a non-exclusive licence for contributions from authors who are: i) UK Crown employees; ii) where BMJ has agreed a CC-BY licence shall apply, and/or iii) in accordance with the terms applicable for US Federal Government officers or employees acting as part of their official duties; on a worldwide, perpetual, irrevocable, royalty-free basis to BMJ Publishing Group Ltd ("BMJ") its licensees and where the relevant Journal is co-owned by BMJ to the co-owners of the Journal, to publish the Work in this journal and any other BMJ products and to exploit all rights, as set out in our [licence](#).

The Submitting Author accepts and understands that any supply made under these terms is made by BMJ to the Submitting Author unless you are acting as an employee on behalf of your employer or a postgraduate student of an affiliated institution which is paying any applicable article publishing charge ("APC") for Open Access articles. Where the Submitting Author wishes to make the Work available on an Open Access basis (and intends to pay the relevant APC), the terms of reuse of such Open Access shall be governed by a Creative Commons licence – details of these licences and which [Creative Commons](#) licence will apply to this Work are set out in our licence referred to above.

Other than as permitted in any relevant BMJ Author's Self Archiving Policies, I confirm this Work has not been accepted for publication elsewhere, is not being considered for publication elsewhere and does not duplicate material already published. I confirm all authors consent to publication of this Work and authorise the granting of this licence.

# Factors Influencing Receipt of an Antibiotic Prescription Among Insured Patients in Tanzania: A Cross-sectional Study

Mohamed Ally Khalfan (M.D., M.P.H., M.Sc.)<sup>\*</sup>, Philip Galula Sasi (M.D. MMed., Ph. D.)<sup>1</sup>, Sabina Ferdinand Mugusi (M.D., Ph. D.)<sup>1</sup>

<sup>1</sup>Department of Clinical Pharmacology, School of Medicine, Muhimbili University of Health and Allied Health Sciences, Dar es Salaam, Tanzania.

<sup>\*</sup>Corresponding author: Mohamed Ally Khalfan, Department of Clinical Pharmacology, School of Medicine, Muhimbili University of Health and Allied Health Sciences, P. O. Box 65001, Dar es Salaam, Tanzania. E-mail: [medi.ally.mk@gmail.com](mailto:medi.ally.mk@gmail.com), <https://orcid.org/0000-0002-1429-5933>

**Key words:** Antibiotic prescription, Factors influencing, Antimicrobial Stewardship Programs, Insured patients, Tanzania

**Abbreviated running title:** Correlates of antibiotic prescription

**Word count:** 3770

## Strengths and Limitations of this study

- To our knowledge, this is the first study in Tanzania to address predictors of receipt of an antibiotic prescription among insured patients.
- Insured patients being an increasing patient population in recent times and its anticipated risk of polypharmacy, studying antibiotic utilization in this group is important.
- Being a cross-sectional design, our study, does not account for seasonal variations in antibiotic use, it lacks robustness in establishing causality, and is less generalizable.
- Our data does not account for rejected claim forms, thereby making the results less generalizable.
- We did not adjust for specific confounders, all variables with  $p < 0.2$  were entered in the multivariable regression to model the receipt of an antibiotic prescription. We, therefore interpret our findings with caution.



## 31 ABSTRACT

32 **Objectives:** There is limited data on factors influencing antibiotic prescription among insured  
33 patients. We assessed for correlates of an antibiotic prescription among insured patients.

34 **Design:** A cross-sectional study

35 **Setting:** The study was conducted at the National Health Insurance Fund offices, Dar es Salaam,  
36 Tanzania

37 **Data source:** We captured data from the claim forms, containing inpatient and outpatient  
38 treatment information for insured patients, for the month of September 2019.

39 **Outcome variable:** Receipt of an antibiotic prescription

40 **Exposure variables:** Age, sex, diagnosis, prescriber qualification, and health facility level,  
41 ownership, and department were exposure variables. Predictors of receipt of an antibiotic  
42 prescription were determined by Poisson regression analysis.

43 **Results:** Of 993 analyzed patients the mean [ $\pm$ SD] age was 36.3 [ $\pm$ 23.2] years, 581 [58.5%] were  
44 females, and 535 [53.9%] were adults. The prevalence of antibiotic prescription was 46.4% (95%  
45 CI, 42.8 - 50.0). Strong predictors of an antibiotic prescription were; being a child 1.7 (95% CI,  
46 1.3 - 2.2), acute upper respiratory tract infection (URTI) of multiple and unspecified site 1.6 (95%  
47 CI, 1.3 - 1.4), chronic rhinitis, nasopharyngitis, and pharyngitis 4.0 (95% CI, 2.4 - 6.4); being  
48 attended by a clinical officer 1.9 (95% CI, 1.2 - 3.0); attending a health center 1.5 (95% CI, 1.1 -  
49 2.0); attending a public facility 1.2 (95% CI, 1.0 - 1.4), and visiting an inpatient department 2.0  
50 (95% CI, 2.0 (1.2 – 3.4).

1  
2  
3 51 **Conclusions:** Among insured patients, being a child, acute URTI, being attended by a clinical  
4  
5 52 officer or dental therapist, being attended by assistant medical/dental officer, attending a health  
6  
7 53 center or a district hospital, attending a public health facility and visiting an inpatient department  
8  
9 54 predicted an antibiotic prescription. Incorporation of these findings in revisions or establishment  
10  
11 55 of targeted antimicrobial stewardship programs may lead to better antibiotic prescribing practices  
12  
13 56 that are critical for combating antibiotic resistance.  
14  
15  
16  
17  
18

## 19 58 INTRODUCTION

20  
21  
22 59 Curtailing antibiotics consumption is important to global health. Antibiotics use and misuse may predispose  
23  
24 60 to development of resistant bacteria. [1–4] Furthermore, it is estimated that half of the prescribed  
25  
26 61 antimicrobials are inappropriate. [5] We should strive to preserve antibiotics at all costs by providing a  
27  
28 62 balance between access and excess as both have detrimental consequences. Delayed access may promote  
29  
30 63 mortality from bacterial infections whilst excessive use increases selection pressure thereby favoring the  
31  
32 64 development of resistant strains. [6] Increased antibiotic exposure in healthcare settings is among the key  
33  
34 65 modifiable drivers of antibiotic resistance. [7,8]

35  
36  
37 66 Emergence and spread of antibiotic resistant bacteria far outweigh the speed with which newer  
38  
39 67 antibiotics receives market approval. [9] Humans, animals, as well as the surroundings face the catastrophic  
40  
41 68 consequences of antibiotics resistance. [10,11] The consequences of which are associated with higher  
42  
43 69 morbidity, longer duration of hospital stay, higher mortality rates and increased healthcare cost [12,13].  
44  
45 70 These consequences are more pronounced in Low- and Middle-Income Countries (LMICs) due to burden  
46  
47 71 of infections, limited resources, poor health system, and weak regulatory enforcement to oversee antibiotics  
48  
49 72 quality assurance, prescriptions and dispensing outlets. [5]

50  
51 73 In Tanzania, resistance to commonly prescribed antibiotics was demonstrated in up to 60% of  $\beta$ -  
52  
53 74 lactamase bacterial isolates from inpatients and outpatients attending a tertiary healthcare facility. [14] In  
54  
55 75 another study, 43.3% of staphylococcus aureus nasal isolates, from inpatients, which are resistant to

1  
2  
3 76 methicillin were also resistant to, second generation cephalosporin, cefoxitin. [15] Some studies in children  
4  
5 77 found bacterial pathogens resistant to multiple antibiotics. [16,17] Therefore, the need of curbing antibiotic  
6  
7 78 prescriptions so as to contribute in the fight against antibiotic resistance is warranted.

9 79 It has been argued that, the more we procrastinate on taking urgent action to protect the current  
10  
11 80 antibiotics we have, the more difficult and expensive it will be to tackle antibiotic resistance in the future.  
12  
13 [18] To combat the problem of increased use of antibiotics and its consequence, building capacity in areas  
14 81  
15 82 of Antimicrobial Stewardship Programs (ASPs) and infection control is important. [19–21] Globally, ASPs  
16  
17 83 in hospitals has shown promise in reducing irrational antibiotic prescriptions. However, implementation  
18  
19 84 challenges and heterogeneity in structures for antimicrobial stewardship in LMICs, emphasize the need for  
20  
21 85 tailored stewardship programs. [22,23]

22  
23  
24 86 It is known that factors from health care providers, patients, and the health system may influence  
25  
26 87 the antibiotic prescription rate. Moreover, there is limited data regarding local factors influencing receipt  
27  
28 88 of an antibiotic prescription among insured patients in Tanzania. This poses a key barrier in developing and  
29  
30 89 implementing targeted antimicrobial stewardship programs. We conducted a study to identify factors that  
31  
32 90 influence receipt of an antibiotic prescription among insured patients. Antimicrobial stewardship programs  
33  
34 91 in LMICs are often not comprehensively implemented and this may be partly because of lack of resources  
35  
36 92 and awareness of local important factors that influence antibiotic prescription. [24,25]

## 37 38 39 40 41 94 **MATERIALS AND METHODS**

42  
43  
44 95 We did a cross sectional study of antibiotics prescription to patients insured by the National Health  
45  
46 96 Insurance Fund (NHIF) involving claim forms submitted to the fund by health facilities in Dar es Salaam  
47  
48 97 City Council (formerly Ilala municipal council) in Dar es Salaam. We chose insured patients because of  
49  
50 98 having a high antibiotic prescription prevalence. [26] Moreover, there is limited data on factors influencing  
51  
52 99 receipt of an antibiotic prescription among this group. Part of the methodology have previously been  
53  
54 100 published. [27] Briefly, data collection from the claim forms was accomplished using a specially designed

1  
2  
3 101 form. All forms submitted for claims, containing inpatient and outpatient patient information, in the period  
4  
5 102 of one month of September 2019, were included in the study. Each claim form submitted to the insurance  
6  
7 103 fund represented a request for payment or reimbursement for a single patient visit after receiving a service  
8  
9 104 by a provider. A decade average of reimbursement rate is about 98.0%. [28] Prescribers and designated  
10  
11 105 healthcare workers at the respective health facility could access the claim forms and prepare them before  
12  
13 106 submitting to the insurance fund. We accessed only the claim forms processed by the fund for paying the  
14  
15 107 health care facilities for the services they have offered in the respective month of September. We could not  
16  
17 108 access rejected claim forms, so they were not part of our sampling frame. We excluded forms for patients  
18  
19 109 attended by physiotherapists or occupational therapists as they were not prescribers.  
20  
21  
22

23 110 Claim forms for 378 patients was our initial sample size and was obtained by assuming 67.7% as  
24  
25 111 prevalence of receiving an antibiotic prescription, [29] a margin of error of 5 % and a 10 % chance of  
26  
27 112 incomplete forms. [30] However, in view of readily available patient claim forms, absence of additional  
28  
29 113 risk to patients and affordability of data collection process, the planned sample size was increased to claim  
30  
31 114 forms for 1100 patients. This was done in order to obtain precise estimates and to have enough data for sub-  
32  
33 115 group analysis with adequate statistical power. Claim forms included in the study were selected randomly  
34  
35 116 [31] from the eligible forms (2A & B) for the month of September 2019 submitted to NHIF headquarters.  
36  
37

38 117 The dependent variable was receipt of an antibiotic prescription. It was a no/yes dichotomous  
39  
40 118 variable. A no/yes question was recorded whether the client received an antibiotic prescription during the  
41  
42 119 health facility visit. Patient, prescriber, and health facility factors were selected on theoretical basis of  
43  
44 120 similar studies. The independent variables were sociodemographic [(sex (male, female), age (child < 18  
45  
46 121 years, adult (18 years and above but < 60 years), elderly ( $\geq$  60 years)], level of health facility (dispensary,  
47  
48 122 health center, district hospital, regional referral hospital, national referral hospital), ownership of health  
49  
50 123 facility (public vs private), final International Classification of Diseases, Tenth Revision (ICD-10)  
51  
52 124 diagnosis code, department visited (inpatient vs outpatient), surgical procedure, polypharmacy (optimal  
53  
54 125 number of drugs per encounter  $\leq$  3), generic name prescribing (optimal 100%), safe injection prescribing  
55  
56  
57  
58  
59  
60

1  
2  
3 126 (encounter with an injection prescribed, optimal  $\leq 10\%$ ), Essential Drug List prescribing (optimal 100%),  
4  
5 127 and prescriber qualification such as clinical officer or dental therapist, assistant medical/dental officer,  
6  
7 128 medical/dental officer, specialist, consultant. The patient, prescriber, and health facility factors that may  
8  
9 129 influence receipt of an antibiotic prescription were derived from the NHIF claim forms 2A & B and were  
10  
11 130 selected on theoretical basis of similar studies.  
12  
13

14 131 There were no missing data in our study as our data source was the patient claim forms submitted  
15  
16 132 to the insurance fund for payment claims by health facilities. Health facilities ensure the completeness of  
17  
18 133 the claim forms so as to avoid any delay in the payment process. We used IBM SPSS Statistics Software  
19  
20 134 Version 23 to analyze our data. Descriptive statistics summarized categorical variables whereas numerical  
21  
22 135 data was summarized by using mean and median. Chi-square test determined the associations between  
23  
24 136 dependent variable (receipt of an antibiotic prescription) and independent variables (factors that influence  
25  
26 137 receipt of an antibiotic prescription) and Fishers Exact test was used when cell count is less than five. To  
27  
28 138 identify predictors of receipt of an antibiotic prescription, we performed a poisson regression with robust  
29  
30 139 variance analysis. To control for confounding. first univariable analysis was done and then factors with a  
31  
32 140 p-value cut off point  $< 0.2$  were entered into the multivariable model. We did not adjust for specific  
33  
34 141 confounders.  
35  
36  
37

## 38 142 **Patient and Public Involvement**

39  
40 143 It was not possible to involve patients and the public in the design, conduct, and reporting of the study  
41  
42 144 however, dissemination plans of the findings to relevant authorities exists.  
43  
44

45 145

## 46 146 **RESULTS**

### 47 147 **Patient characteristics**

48  
49 148 Sociodemographic characteristics of patients of this study has been published elsewhere. [27] In summary,  
50  
51 149 out of 993 patients who met the analysis criteria, most were adults ( $n = 535, 54\%$ ) and of female sex ( $n =$   
52  
53 150  $581, 59\%$ ). The average age ( $\pm$  Standard Deviation - SD) was  $36.3 (\pm 23.2)$  years. Most patients visited the  
54  
55  
56  
57  
58  
59  
60

151 outpatient department (n = 975, 98%) and private health care facilities (n = 525, 53%). Majority of patients  
 152 (n = 548, 55.2%) attended a national referral hospital facility and most (n = 437, 44.0%) received a specialist  
 153 consultation (Table 1). The complete list of patient characteristics is found in the supplement (Supplement  
 154 1). The outcome of interest, receipt of an antibiotic prescription, was found in (n = 357, 46.4%) of patients.

155

156 **Table 1. Socio-demographic and other patient characteristics**

| <b>Characteristic (N = 993)</b>        | <b>n (%)</b> |
|----------------------------------------|--------------|
| <b>Age in years</b>                    |              |
| Mean (SD) = 36.3 (23.2), Median = 37.0 |              |
| Children (< 18 years)                  | 264 (26.6)   |
| Adults (18-59 years)                   | 535 (53.9)   |
| Elderly ( $\geq$ 60 years)             | 194 (19.5)   |
| <b>Sex</b>                             |              |
| Male                                   | 412 (41.5)   |
| Female                                 | 581 (58.5)   |
| <b>Level of health facility</b>        |              |
| Dispensary                             | 102 (10.3)   |
| Health Centre                          | 119 (12.0)   |
| District Hospital                      | 101 (10.2)   |
| Regional Referral Hospital             | 123 (12.4)   |
| National Referral Hospital             | 548 (55.2)   |
| <b>Ownership of health facility</b>    |              |
| Public                                 | 468 (47.1)   |
| Private                                | 525 (52.9)   |
| <b>Department visited</b>              |              |
| Outpatient                             | 975 (98.2)   |
| Inpatient                              | 18 (1.8)     |
| <b>Any Procedure/Surgery done</b>      |              |
| No                                     | 940 (94.7)   |
| Yes                                    | 53 (5.3)     |
| <b>Prescriber Qualification</b>        |              |
| Clinical Officer/Dental Therapist      | 132 (13.3)   |
| Assistant Medical/Dental Officer       | 18 (1.8)     |
| Medical/Dental Officer                 | 320 (32.2)   |
| Specialist                             | 437 (44.0)   |
| Consultant                             | 86 (8.7)     |

1  
2  
3 157 Diagnoses were reported using ICD-10 diagnostic criteria. Among patients, other disorders of the urinary  
4  
5 158 system (n = 102, 10.3%) was the most common. The other disorders of urinary system, ICD10-N39  
6  
7 159 diagnostic code, encompass diagnoses such as: Urinary Tract Infection (UTI), site not specified; persistent  
8  
9 160 proteinuria, unspecified; stress incontinence; other specified urinary incontinence; other specified disorders  
10  
11 161 of urinary system and disorders of urinary system, unspecified. The prevalence of acute and URTI of  
12  
13 162 multiple and unspecified site was (n = 65, 6.5%) whereas that of acute tonsillitis was (n =24, 2.4%). A  
14  
15 163 complete list of prevalence of diagnoses among the study participants is found in supplement 1.

### 164 **Patient characteristics by receipt of an antibiotic prescription**

165 About two-thirds of children (65.4%) received an antibiotic prescription when compared with adults  
166 (45.2%) and the elderly (23.0%) (Figure 1). Over three-quarters of patients (77.0%) who attended lower-  
167 level health facilities such as dispensaries received an antibiotic prescription compared to those who  
168 attended health facilities at the level of a national referral hospital (30.5%) (Figure 2). A higher proportion  
169 (80.0%) of patients who were attended by either assistant medical or dental officers received an antibiotic  
170 prescription when compared with medical or dental officers (51.4%), specialists (30.3%), and consultant  
171 (23.0%) (Figure 3).

172 More than two-third of patients (70.6%), who visited the inpatient department, received an  
173 antibiotic prescription compared to those who visited the outpatient department (45.8%). Most patients with  
174 acute tonsillitis (95.8%) and those of other disorders of urinary system (93.7%) were prescribed an  
175 antibiotic. A complete list of distribution of study characteristics by receipt of an antibiotic prescription is  
176 presented in Supplement 2.

### 177 **Factors associated with receipt of an antibiotic prescription**

178 Evidence of an association between the following factors and receipt of an antibiotic prescription were  
179 observed. The prevalence of receipt of an antibiotic prescription were highest among patients with chronic  
180 rhinitis, nasopharyngitis, and pharyngitis and was about four times compared to those who have no such a  
181 diagnosis. This was followed by a diagnosis of other disorders of the bladder in which the prevalence of

1  
2  
3 182 receipt of an antibiotic prescription was about 3.5 times compared to those without such a diagnosis (aPR  
4  
5 183 = 3.5, 95% CI; 2.5-4.8),  $p < 0.001$ . Moreover, having a diagnosis of acute and URTI of multiple and  
6  
7 184 unspecified site was associated with receipt of an antibiotic prescription at a prevalence of about 1.6 times  
8  
9 185 than those who were not (aPR = 1.6, 95% CI; 1.3-1.4),  $p < 0.001$ .

11  
12 186 The prevalence of receipt of an antibiotic prescription was about 1.7 times in children compared to  
13  
14 187 that with the elderly. Attending a Health Center was associated with about 1.5 times the prevalence of  
15  
16 188 receipt of an antibiotic prescription compared to those who attended the national referral hospital (aPR =  
17  
18 189 1.5, 95% CI; 1.1 - 2.0),  $p < 0.009$ . Similarly, attending a district hospital predicted receipt of an antibiotic  
19  
20 190 prescription (aPR = 1.5, 95% CI; 1.1 - 1.9),  $p < 0.004$  when compared to those who attended the national  
21  
22 191 referral hospital. Furthermore, the prevalence of receipt of an antibiotic prescription was about 1.9 times  
23  
24 192 higher in patients attended by a clinical officer or a dental therapist compared to those attended by a  
25  
26 193 consultant. In addition, being attended by an assistant medical or dental officer was associated with an  
27  
28 194 antibiotic prevalence of about two times that those being attended by a consultant (Table 2). Patients with  
29  
30 195 non-ideal generic prescriptions had an antibiotic prescription prevalence of 1.3 times that of patients with  
31  
32 196 ideal generic prescriptions (aPR = 1.3, 95% CI; 1.1 - 1.5),  $p < 0.002$ .

33  
34  
35  
36 197 Moreover, patients who attended a public hospital had an antibiotic prescription prevalence of  
37  
38 198 about 1.2 times compared to those who attended a private hospital whereas attending an inpatient  
39  
40 199 department predicted receipt of an antibiotic prescription compared to attending an outpatient department  
41  
42 200 (aPR = 2.0, 95% CI; 1.2 - 3.4),  $p < 0.01$ . Similar prevalence of receipt of an antibiotic prescription were  
43  
44 201 seen in patients having diagnoses of candidiasis, and acute and URTI of multiple and unspecified site. The  
45  
46 202 complete list of variables subjected to univariate and multivariate analysis is found in Supplement 3.

47  
48  
49 203

50  
51  
52 204

53  
54  
55 205



206 **Table 2: Poisson regression analysis of factors influencing receipt of an antibiotic prescription**

| Characteristic (N = 770)                                       | Univariate Regression |         | Multivariate Regression |         |
|----------------------------------------------------------------|-----------------------|---------|-------------------------|---------|
|                                                                | cPR* (95% CI)         | P value | aPR** (95% CI)          | P value |
| <b>Age in years</b>                                            |                       |         |                         |         |
| Children (< 18 years)                                          | 2.8 (2.1 – 3.9)       | < 0.001 | 1.7 (1.3 – 2.2)         | < 0.001 |
| Adults (18-59 years)                                           | 2.0 (1.4 - 2.7)       | < 0.001 | 1.5 (1.1 - 1.9)         | 0.004   |
| Elderly (≥ 60 years)                                           | 1 [Ref.]              |         | 1 [Ref.]                |         |
| <b>Any medical procedure/surgery done</b>                      |                       |         |                         |         |
| Yes                                                            | 1.4 (1.1 – 1.9)       | 0.01    | 1.3 (0.8 – 2.0)         | 0.34    |
| No                                                             | 1 [Ref.]              |         | 1 [Ref.]                |         |
| <b>Chronic rhinitis, nasopharyngitis and pharyngitis - J31</b> |                       |         |                         |         |
| Yes                                                            | 2.2 (2.0 – 2.3)       | < 0.001 | 4.0 (2.4 – 6.4)         | < 0.001 |
| No                                                             | 1 [Ref.]              |         | 1 [Ref.]                |         |
| <b>Other disorders of bladder - N32</b>                        |                       |         |                         |         |
| Yes                                                            | 2.2 (2.0 – 2.3)       | < 0.001 | 3.5 (2.5 – 4.8)         | < 0.001 |
| No                                                             | 1 [Ref.]              |         | 1 [Ref.]                |         |
| <b>Disease of the pulp and periapical tissues - K04</b>        |                       |         |                         |         |
| Yes                                                            | 2.2 (2.0 – 2.4)       | < 0.001 | 3.4 (2.3 – 4.8)         | < 0.001 |
| No                                                             | 1 [Ref.]              |         | 1 [Ref.]                |         |
| <b>Infections of genitourinary tract in pregnancy - O23</b>    |                       |         |                         |         |
| Yes                                                            | 2.2 (2.0 – 2.3)       | < 0.001 | 2.9 (2.1 – 4.0)         | < 0.001 |
| No                                                             | 1 [Ref.]              |         | 1 [Ref.]                |         |
| <b>Cutaneous abscess, furuncle and carbuncle - L02</b>         |                       |         |                         |         |
| Yes                                                            | 2.2 (2.0 – 2.3)       | < 0.001 | 3.0 (1.9 – 4.9)         | < 0.001 |
| No                                                             | 1 [Ref.]              |         | 1 [Ref.]                |         |
| <b>Acute pharyngitis – J02</b>                                 |                       |         |                         |         |
| Yes                                                            | 1.8 (1.3 – 2.6)       | 0.002   | 2.7 (1.1 – 6.3)         | 0.03    |
| No                                                             | 1 [Ref.]              |         | 1 [Ref.]                |         |
| <b>Acute tonsillitis - J03</b>                                 |                       |         |                         |         |
| Yes                                                            | 2.1 (1.9 – 2.4)       | < 0.001 | 2.3 (1.8 – 3.0)         | < 0.001 |
| No                                                             | 1 [Ref.]              |         | 1 [Ref.]                |         |
| <b>Acute and URTI of multiple and unspecified sites - J06</b>  |                       |         |                         |         |
| Yes                                                            | 1.8 (1.6-2.1)         | < 0.001 | 1.6 (1.3 – 1.9)         | < 0.001 |
| No                                                             | 1 [Ref.]              |         | 1 [Ref.]                |         |
| <b>Candidiasis - B37</b>                                       |                       |         |                         |         |
| Yes                                                            | 1.9 (1.5 – 2.4)       | < 0.001 | 1.6 (1.2 – 2.1)         | 0.002   |
| No                                                             | 1 [Ref.]              |         | 1 [Ref.]                |         |

\*cPR, Crude Prevalence Ratio; \*\*aPR, Adjusted Prevalence Ratio; CI, Confidence Interval, Ref. Reference category

**Table 2: Poisson Regression analysis of factors influencing receipt of an antibiotic prescription (continued...)**

| Characteristic (n = 770)                                      | Univariate Regression |         | Multivariate Regression |         |
|---------------------------------------------------------------|-----------------------|---------|-------------------------|---------|
|                                                               | cPR* (95% CI)         | P value | aPR** (95% CI)          | P value |
| <b>Prescriber Qualification</b>                               |                       |         |                         |         |
| Clinical Officer/Dental Therapist                             | 3.4 (2.1-5.5)         | < 0.001 | 1.9 (1.2-3.0)           | 0.005   |
| Assistant Medical/Dental Officer                              | 3.5 (2.1-5.9)         | < 0.001 | 2.0 (1.1-3.4)           | 0.02    |
| Medical/Dental Officer                                        | 2.2 (1.4-3.6)         | 0.001   | 1.6 (1.1-2.5)           | 0.03    |
| Specialist                                                    | 1.3 (0.8-2.1)         | 0.27    | 1.3 (0.8-1.9)           | 0.25    |
| Consultant                                                    | 1 [Ref.]              |         | 1 [Ref.]                |         |
| <b>All medications prescribed using their generic names</b>   |                       |         |                         |         |
| No                                                            | 1.2 (1.0-1.4)         | 0.02    | 1.3 (1.1-1.5)           | 0.002   |
| Yes                                                           | 1 [Ref.]              |         | 1 [Ref.]                |         |
| <b>Presence of injectable formulation in the prescription</b> |                       |         |                         |         |
| Yes                                                           | 1.4 (1.1-1.7)         | 0.003   | 1.4 (1.1-1.8)           | 0.004   |
| No                                                            | 1 [Ref.]              |         | 1 [Ref.]                |         |
| <b>Level of health facility</b>                               |                       |         |                         |         |
| Dispensary                                                    | 2.5 (2.1-3.0)         | < 0.001 | 1.3 (0.9-1.8)           | 0.14    |
| Health Centre                                                 | 2.1 (1.7-2.6)         | < 0.001 | 1.5 (1.1-2.0)           | 0.009   |
| District Hospital                                             | 2.4 (1.9-2.9)         | < 0.001 | 1.5 (1.1-1.9)           | 0.004   |
| Regional Referral Hospital                                    | 1.1 (0.8-1.4)         | 0.77    | 1.0 (0.7-1.4)           | 0.97    |
| National Referral Hospital                                    | 1 [Ref.]              |         | 1 [Ref.]                |         |
| <b>Ownership of health facility</b>                           |                       |         |                         |         |
| Public                                                        | 0.7 (0.6-0.8)         | < 0.001 | 1.2 (1.0-1.4)           | 0.03    |
| Private                                                       | 1 [Ref.]              |         | 1 [Ref.]                |         |
| <b>Department visited</b>                                     |                       |         |                         |         |
| Inpatient                                                     | 1.5 (1.1-2.1)         | 0.007   | 2.0 (1.2-3.4)           | 0.01    |
| Outpatient                                                    | 1 [Ref.]              |         | 1 [Ref.]                |         |

\*cPR, Crude Prevalence Ratio; \*\*aOR, Adjusted Prevalence Ratio; CI, Confidence Interval; Ref., Reference category.

207

## 208 DISCUSSION

209 We conducted a cross-sectional study among insured patients to determine factors influencing receipt of an  
 210 antibiotic prescription. We assessed factors related to patient, prescriber, and the health facility. Factors,  
 211 related to patient, with strong evidence of association with receipt of an antibiotic prescription included  
 212 being a child and having a diagnosis of URTI. Prescriber-related factors influencing receipt of antibiotic  
 213 prescription were being attended by a clinical officer or dental therapist and assistant medical/dental officer.  
 214 Furthermore, absence of ideal generic prescribing and presence of injectable formulation in the prescription,  
 215 both independently predicted receipt of an antibiotic prescription. Factors related to the health facility that

1  
2  
3 216 were associated with receipt of an antibiotic prescription included attending either a health center or a  
4  
5 217 district hospital, attending a public health facility, and visiting an inpatient department.  
6  
7

8 218 Antimicrobial stewardship is the most promising strategy to stop misuse and excessive use of  
9  
10 219 antibiotics. However, implementation of such programs is challenging and thus, research looking into ways  
11  
12 220 of strengthening antibiotic stewardship programs is critical for ensuring optimal clinical outcomes, minimal  
13  
14 221 unintended consequences of antibiotics use, improved susceptibility rates to targeted antibiotics, optimal  
15  
16 222 resource utilization and hence, control of bacterial infections. The thrust of our study was to define factors  
17  
18 223 that are strong predictors of an antibiotic prescription so that ASPs may see where to put emphasis.  
19  
20

21 224 We have identified diagnosis of URTI, both acute and chronic, as the strong predictors of an  
22  
23 225 antibiotic prescription in our study population. This means that the microbiology laboratory aspect of  
24  
25 226 antimicrobial stewardship such as provision of culture and sensitivity results on a regular basis or  
26  
27 227 preparation of annual antibiotic susceptibility pattern needs to be established and strengthened. There are  
28  
29 228 criteria, WHO or IMCI for prescribing an antibiotic for URTI. However, when clinicians are unwilling to  
30  
31 229 go through the procedures or when procedures are not available, prescription of an antibiotic will be the  
32  
33 230 easy way out and without taking risk for possibility of untreated or delayed treatment of a bacterial infection.  
34  
35 231 Although most URTIs have a viral etiology and have a self-limiting course, antibiotics are commonly  
36  
37 232 prescribed. [32] This observation is in line with other previous published literature that have demonstrated  
38  
39 233 this association. [33–36] The patient and the public should be informed that most of the acute URTIs are  
40  
41 234 viral in origin and they require supportive therapy and not antibiotics. This will decrease patient antibiotic  
42  
43 235 expectation. Although some studies shows no evidence, [37] facility-specific guidelines and algorithms,  
44  
45 236 adapted from national standard treatment guideline, should be established with respect to properly  
46  
47 237 diagnosing and treating URTIs. [38–40]  
48  
49

50  
51 238 Our data shows that the prevalence of receipt of an antibiotic prescription was high among children  
52  
53 239 and with a decreasing trend towards the elderly. URTIs and non-bloody diarrhea being prevalent in children  
54  
55 240 and mostly treated with antibiotics despite being viral in origin and contrary to treatment guidelines may  
56  
57

1  
2  
3 241 explain this finding. [41,42] This observation is comparable to other published results. [26,33,43–45]  
4  
5 242 Moreover, immune senescence in the elderly causes atypical presentations of infectious disease symptoms  
6  
7 243 such as fever and cough whereas in children they are more pronounced. [46] ASPs should be strengthened  
8  
9 244 in pediatrics so as to decrease antibiotic prescriptions as there is strong evidence supporting that such an  
10  
11 245 approach. [47,48] Despite the challenges of implementing ASPs in pediatrics, clinical education, care-giver  
12  
13 246 education, updated facility-specific guidelines and prospective audit and feedback, are stewardship  
14  
15 247 interventions shown to decrease antibiotics utilization. [49–51]  
16  
17

18 248 Being attended by a clinical officer or dental therapist is another factor which appears to influence  
19  
20 249 prescription of an antibiotic. The prevalence of receipt of an antibiotic prescription was about 1.7 times in  
21  
22 250 patients who were attended by either a clinical officer or dental therapists when compared to those seen by  
23  
24 251 consultants. Similarly, the prevalence of antibiotic prescription in patients attended by an assistant  
25  
26 252 medical/dental officer was twice to that of patients seen by a consultant. Clinical officers, dental therapists,  
27  
28 253 and assistant medical/dental officer being less experienced and less trained to prescribe probably explains  
29  
30 254 this observation. Moreover, clinical officers, dental therapists, assistant medical/dental officers, usually  
31  
32 255 work in primary healthcare facilities in which there is a high volume of patients and fewer resources which  
33  
34 256 increases the likelihood of irrational medication prescriptions including antibiotics. [52] This antibiotic  
35  
36 257 prescribing disparity between prescribers with different qualifications was also demonstrated in previous  
37  
38 258 studies. [53] Another study in Hubei, China, similarly, found that prescribers with higher qualifications  
39  
40 259 were less likely to prescribe antibiotics. [52] This finding emphasizes the need for antibiotic stewardship  
41  
42 260 interventions to target clinical officers, dental therapists, assistant medical/dental officers through clinical  
43  
44 261 education. Opportunities and protected time for clinicians to address knowledge gap through continuing  
45  
46 262 medical education has been found to improve antibiotic utilization. [54–56] Therefore, it is important for  
47  
48 263 hospital policies and administrators to provide clinicians with such opportunities.  
49  
50  
51  
52

53 264 Ideally, all medications in a prescription should be written in their generic names as per  
54  
55 265 WHO/INRUD prescribing indicators. We observed strong evidence of an association between non-ideal  
56  
57  
58  
59  
60

1  
2  
3 266 generic prescribing and receipt of an antibiotic prescription. This observation may be explained by the fact  
4  
5 267 that both sub-optimal generic prescribing and over-prescribing antibiotics are indicators of poor prescribing  
6  
7 268 practice. [33] In addition, presence of an injectable formulation in the prescription was associated with  
8  
9 269 receipt of an antibiotic. The presence of an injectable formulation in the prescription may be indicative of  
10  
11 270 the severity of the illness or infection and this may explain why the prevalence of receiving an antibiotic  
12  
13 271 prescription is higher. It is essential that ASPs enables prescribers adhere to generic prescribing and other  
14  
15 272 good prescribing practices.  
16  
17

18 273 Studies have shown that patient's likelihood of receipt of an antibiotic prescription is influenced  
19  
20 274 by the type of health facility they have attended to. A study in Ghana showed that attending a Health Center  
21  
22 275 or a clinic is associated with receipt of an antibiotic prescription. [33] Similarly, we have revealed that,  
23  
24 276 there is strong evidence of an association between patient attending a health center and receiving an  
25  
26 277 antibiotic prescription when compared to those attending a national referral hospital. This observation may  
27  
28 278 be attributed to limited resources in terms of medications and diagnostic capabilities resulting in empiric  
29  
30 279 prescribing of antibiotics. Indeed, targeting lower-level health facilities with antimicrobial stewardship  
31  
32 280 interventions such clinical education, facility-specific guidelines for common infections, and antibiotic  
33  
34 281 oversight through prospective audit and feedback may decrease antibiotic prescriptions. [48,50]  
35  
36  
37

38 282 Surprisingly, our study showed that attending a public health facility was associated with a higher  
39  
40 283 prevalence of receipt of an antibiotic prescription. This was a surprising finding as private health facilities  
41  
42 284 are driven by profit, so we did expect them to prescribe more medications including antibiotics to patients  
43  
44 285 when compared with public health facilities. We speculate that, insured patients are more likely to attend  
45  
46 286 private health facilities where prescribers better adhere to insurance guidelines than those in public  
47  
48 287 facilities. This was in line with a South African study by Mohlala and colleagues. [57] Similarly, an  
49  
50 288 Australian study also showed a higher prevalence of antibiotic prescriptions for treatment and not for  
51  
52 289 prophylaxis in public hospitals when compared with private hospitals. [58] This is a worrisome finding as,  
53  
54 290 in general, majority of patients are likely to be seen in public health facilities thus antibiotic prescriptions  
55  
56  
57  
58  
59

1  
2  
3 291 might be higher than what we have observed. Clinical education, facility-specific guidelines and antibiotic  
4  
5 292 oversight should be established or strengthened in public health facilities.  
6  
7

8 293         Attending the inpatient department was also associated with a prevalence of receipt of an antibiotic  
9  
10 294 prescription twice to that of patients who visited the outpatient department. This high antibiotic prevalence  
11  
12 295 could be explained by the fact that inpatients tend to have a more severe illness when compared with those  
13  
14 296 treated at the outpatient department. A similar observation of high antibiotic prescriptions among inpatients  
15  
16 297 was found in a study by Bediako-Bowan et al. in Ghana. [59] Facility specific guidelines for inpatient  
17  
18 298 management should be established or strengthened to minimize antibiotic prescriptions.  
19

20  
21 299         To our knowledge, this is the first study in Tanzania to address predictors of receipt of an antibiotic  
22  
23 300 prescription among insured patients. Insured patients being an increasing patient population in recent times  
24  
25 301 and its anticipated risk of polypharmacy, studying antibiotic utilization in this group is important. Our data  
26  
27 302 does not account for rejected claim forms, thereby making the results less generalizable. Using patient claim  
28  
29 303 forms submitted to the insurance fund as our data source ensured no missing data as incomplete forms are  
30  
31 304 not processed for payment and usually returned to the healthcare provider. However, limitations of this  
32  
33 305 study include inherent weakness of cross-sectional studies as they lack robustness in establishing causality,  
34  
35 306 lack of generalizability of the study findings as our study population was only insured patients, and inability  
36  
37 307 to account for seasonal variations in antibiotic use. Moreover, the overly large sample size used may cause  
38  
39 308 small differences in observations to be statistically significant without any clinical significance.  
40  
41 309 Furthermore, we did not adjust for specific confounders, all variables with  $p < 0.2$  were entered in the  
42  
43 310 multivariable regression to model the main effect. We, therefore interpret our findings with caution.  
44  
45

## 46 47 311 **CONCLUSIONS**

48  
49 312 Factors influencing antibiotic prescription in Tanzania are similar to factors reported in literature. Being a  
50  
51 313 child, having a diagnosis of URTIs, being attended by a clinical officer, dental therapist and assistant  
52  
53 314 medical/dental officer, and attending a health center or district hospital, and attending a public health  
54  
55  
56  
57  
58  
59

315 facility, appear to be the most important factors that when targeted through antimicrobial stewardship  
316 activities may have an important impact on antibiotic misuse and excessive use.

317 **Ethical approval:** Ethical approval from the research and publication committee of MUHAS was sought  
318 and was granted (Ref. No. DA.287/298/01A). We requested further permission from the Director of  
319 National Health Insurance Fund (NHIF) to proceed with the study using NHIF database after informing  
320 him of the purpose of the study and possible benefits to NHIF as well as to the society at large. Utmost  
321 confidentiality was maintained as no personal identifiers were collected by our data capture tool.

322 **Author contribution:** MAK, PGS, and SFM conceptualized and designed the study, collected, analyzed  
323 and interpreted the data. MAK drafted the initial manuscript. MAK, PGS, and SFM critically revised the  
324 manuscript and approved the final version to be submitted.

325 **Acknowledgements:** We thank Mr. Gilbert Kubenea and Sr. Rehema Hassan who helped us to retrieve the  
326 files of potentially eligible participants from the archives. We appreciate the help of Dr. Ngalela Kateule  
327 and Sr. Neema Manga, for assisting us to obtain the sampling frame list. Research assistant, Mr. Roman  
328 Mathias, assisted with the data collection. We acknowledge that details of the methods have been published  
329 elsewhere. Finally, we thank the management of NHIF for permission and corporation during the conduct  
330 of the study.

331 **Funding:** This work was supported by Ministry of Education, Science and Technology, Tanzania

332 **Conflict of Interest:** None to declare.

333 **Data availability statement:** All data relevant to the study are included in the article or uploaded as  
334 supplementary information

## 335 REFERENCES

- 336 1 Gelband H, Miller-petrie M, Pant S, *et al*. The State of the World ' s Antibiotics 2015. *Wound Healing*  
337 *Southern Africa* 2015;**8**:30–4.



- 1  
2  
3 338 2 Roca I, Akova M, Baquero F, *et al.* The global threat of antimicrobial resistance: Science for  
4 339 intervention. *New Microbes and New Infections* 2015;**6**:22–9. doi:10.1016/j.nmni.2015.02.007  
5  
6 340 3 Wei X, Zhang Z, Walley J, *et al.* Reducing antibiotic for child upper respiratory infections in rural  
7 341 china: an RCT, process evaluation and cost-effectiveness analysis. *American journal of respiratory*  
8 342 *and critical care medicine Conference: american thoracic society international conference, ATS 2018*  
9 343 *United states* 2018;**197**.  
10  
11  
12 344 4 Yates TD, Davis ME, Taylor YJ, *et al.* Not a magic pill: a qualitative exploration of provider  
13 345 perspectives on antibiotic prescribing in the outpatient setting. *BMC Fam Pract* 2018;**19**:96.  
14 346 doi:10.1186/s12875-018-0788-4  
15  
16 347 5 Sharland M, Saroey P, Berezin EN. The global threat of antimicrobial resistance - The need for  
17 348 standardized surveillance tools to define burden and develop interventions. *Jornal de Pediatria*  
18 349 *(Versão em Português)* 2015;**91**:410–2. doi:10.1016/j.jpedp.2015.07.014  
19  
20  
21 350 6 Das P, Horton R. Antibiotics: achieving the balance between access and excess. *The Lancet*  
22 351 2016;**387**:102–4. doi:10.1016/S0140-6736(15)00729-1  
23  
24 352 7 Holmes AH, Moore LSP, Sundsfjord A, *et al.* Understanding the mechanisms and drivers of  
25 353 antimicrobial resistance. *The Lancet* 2016;**387**:176–87. doi:10.1016/S0140-6736(15)00473-0  
26  
27 354 8 Karam G, Chastre J, Wilcox MH, *et al.* Antibiotic strategies in the era of multidrug resistance. *Critical*  
28 355 *Care*. 2016;**20**. doi:10.1186/s13054-016-1320-7  
29  
30 356 9 Ruiz J, Castro I, Calabuig E, *et al.* Non-antibiotic treatment for infectious diseases. *Rev Esp Quimioter*  
31 357 2017;**30**:66–71.  
32  
33  
34 358 10 Williams-nguyen J, Sallach JB, Bartelt-hunt S, *et al.* State of the Science. *Journal of Environmental*  
35 359 *Quality* 2016;**45**:394–406. doi:10.2134/jeq2015.07.0336  
36  
37 360 11 Khabbaz R, Cars O, Kumar S, *et al.* Implementation of the global action plan on antimicrobial  
38 361 resistance. *WHO GAP AMR Newsletter N°32* 2017;:1–4. doi:10.1016/j.visres.2009.03.016  
39  
40 362 12 Manyi-Loh C, Mamphweli S, Meyer E, *et al.* Antibiotic use in agriculture and its consequential  
41 363 resistance in environmental sources: Potential public health implications. 2018.  
42 364 doi:10.3390/molecules23040795  
43  
44 365 13 Friedman ND, Temkin E, Carmeli Y. The negative impact of antibiotic resistance. *Clinical*  
45 366 *Microbiology and Infection*. 2016;**22**:416–22. doi:10.1016/j.cmi.2015.12.002  
46  
47 367 14 Kajeguka DC, Nambunga PP, Kabissi F, *et al.* Antimicrobial resistance patterns of phenotype  
48 368 Extended Spectrum Beta- Lactamase producing bacterial isolates in a referral hospital in northern.  
49 369 *Tanzania Journal of Health Reseach* 2015;**17**:1–8. doi:10.4314/thrb.v17i3.%c  
50  
51  
52 370 15 Kumburu HH, Sonda T, Leekitcharoenphon P, *et al.* Hospital Epidemiology of Methicillin-Resistant  
53 371 *Staphylococcus aureus* in a Tertiary Care Hospital in Moshi, Tanzania, as Determined by Whole  
54 372 Genome Sequencing. *BioMed Research International* 2018;**2018**:1–12. doi:10.1155/2018/2087693  
55  
56  
57  
58  
59  
60



- 1  
2  
3 373 16 Christopher A, Mshana SE, Kidenya BR, *et al.* Bacteremia and resistant gram-negative pathogens  
4 374 among under-fives in Tanzania. *Italian Journal of Pediatrics* 2013;**39**. doi:10.1186/1824-7288-39-27  
5  
6 375 17 Ahmed M, Mirambo MM, Mushi MF, *et al.* Bacteremia caused by multidrug-resistant bacteria  
7 376 among hospitalized malnourished children in Mwanza, Tanzania: A cross sectional study. *BMC*  
8 377 *Research Notes* 2017;**10**. doi:10.1186/s13104-017-2389-z  
9  
10 378 18 Tibrewal R. A Review On Combating Antibiotic Resistance. *International Journal of Medical and*  
11 379 *Biomedical Studies* 2018;**1**. doi:10.32553/ijmbs.v1i1.14  
12  
13  
14 380 19 Abu Sin M, Nahrgang S, Ziegelmann A, *et al.* Global and national strategies against antibiotic  
15 381 resistance. *Bundesgesundheitsblatt - Gesundheitsforschung - Gesundheitsschutz*. 2018;**61**:507–14.  
16 382 doi:10.1007/s00103-018-2722-2  
17  
18 383 20 Prentiss T, Weisberg K, Zervos J. Building Capacity in Infection Prevention and Antimicrobial  
19 384 Stewardship in Low- and Middle-Income Countries: the Role of Partnerships Inter-countries. *Current*  
20 385 *Treatment Options in Infectious Diseases* 2018;**10**:7–16. doi:10.1007/s40506-018-0140-5  
21  
22 386 21 Laxminarayan R, Duse A, Wattal C, *et al.* Antibiotic resistance-the need for global solutions. *The*  
23 387 *Lancet Infectious Diseases*. 2013;**13**:1057–98. doi:10.1016/S1473-3099(13)70318-9  
24  
25 388 22 Smith I, Lescure X, Singh S, *et al.* The implementation of antimicrobial stewardship in low, middle  
26 389 and high income countries. *International Journal of Infectious Diseases* 2018;**73**:140.  
27 390 doi:10.1016/j.ijid.2018.04.3731  
28  
29 391 23 World Health Organization. *Antimicrobial stewardship interventions: a practical guide*. Copenhagen:  
30 392 : WHO Regional Office for Europe 2021.  
31  
32 393 24 Cox JA, Vlieghe E, Mendelson M, *et al.* Antibiotic stewardship in low- and middle-income countries:  
33 394 the same but different? *Clinical microbiology and infection : the official publication of the European*  
34 395 *Society of Clinical Microbiology and Infectious Diseases* 2017;**23**:812–8.  
35 396 doi:10.1016/J.CMI.2017.07.010  
36  
37 397 25 Sangeda RZ, Kibona J, Munishi C, *et al.* Assessment of Implementation of Antimicrobial Resistance  
38 398 Surveillance and Antimicrobial Stewardship Programs in Tanzanian Health Facilities a Year After  
39 399 Launch of the National Action Plan. *Frontiers in public health* 2020;**8**.  
40 400 doi:10.3389/FPUBH.2020.00454  
41  
42 401 26 Okoro RN, Nmeka C, Erah PO. Antibiotics prescription pattern and determinants of utilization in the  
43 402 national health insurance scheme at a tertiary hospital in Nigeria. *African Health Sciences*  
44 403 2019;**19**:2356–64. doi:10.4314/ahs.v19i3.8  
45  
46 404 27 Khalfan MA, Sasi PG, Mugusi SF. The prevalence and pattern of antibiotic prescription among  
47 405 insured patients in Dar es Salaam Tanzania. *Pan African Medical Journal* 2021;**40**.  
48 406 doi:10.11604/PAMJ.2021.40.140.29584  
49  
50 407 28 Embrey M, Mbwasi R, Shekalaghe E, *et al.* National Health Insurance Fund's relationship to retail  
51 408 drug outlets: a Tanzania case study. *Journal of Pharmaceutical Policy and Practice* 2021;**14**:1–12.  
52 409 doi:10.1186/S40545-021-00303-0/TABLES/2  
53  
54  
55  
56  
57  
58  
59  
60

- 1  
2  
3 410 29 Irunde H, Minzi O, Moshiro C. Assessment of Rational Medicines Prescribing in Healthcare Facilities  
4 411 in Four Regions of Tanzania. *JPPCM* 2017;**3**:225–31. doi:10.5530/jppcm.2017.4.64  
5
- 6 412 30 Kirkwood B, Sterne J. Calculation of required sample size. In: *Essentials of Medical Statistics*. 2003.  
7 413 413–24.  
8
- 9 414 31 OpenEpi - Toolkit Shell for Developing New Applications.  
10 415 <http://www.openepi.com/Random/Random.htm> (accessed 16 Nov 2021).  
11
- 12 416 32 Kilipamwambu A, Bwire GM, Myemba DT, *et al*. WHO/INRUD core prescribing indicators and  
13 417 antibiotic utilization patterns among primary health care facilities in Ilala district, Tanzania. *JAC-*  
14 418 *antimicrobial resistance* 2021;**3**. doi:10.1093/JACAMR/DLAB049  
15
- 16 419 33 Ahiabu MA, Tersbøl BP, Biritwum R, *et al*. A retrospective audit of antibiotic prescriptions in primary  
17 420 health-care facilities in Eastern Region, Ghana. *Health Policy and Planning* 2016;**31**:250–8.  
18 421 doi:10.1093/heapol/czv048  
19
- 20 422 34 Shamsuddin S, Akkawi ME, Zaidi STR, *et al*. Antimicrobial drug use in primary healthcare clinics: a  
21 423 retrospective evaluation. *International Journal of Infectious Diseases* 2016;**52**:16–22.  
22 424 doi:10.1016/j.ijid.2016.09.013  
23
- 24 425 35 Ahmad A, Khan M, Malik S, *et al*. Prescription patterns and appropriateness of antibiotics in the  
25 426 management of cough/cold and diarrhea in a rural tertiary care teaching hospital. *Journal of*  
26 427 *Pharmacy And Bioallied Sciences* 2016;**8**:335. doi:10.4103/0975-7406.199340  
27
- 28 428 36 Rogawski ET, Platts-Mills JA, Seidman JC, *et al*. Early Antibiotic Exposure in Low-resource Settings Is  
29 429 Associated with Increased Weight in the First Two Years of Life. *Journal of Pediatric*  
30 430 *Gastroenterology and Nutrition* 2017;**65**:350–6. doi:10.1097/MPG.0000000000001640  
31
- 32 431 37 Sato D, Goto T, Uda K, *et al*. Impact of national guidelines for antimicrobial stewardship to reduce  
33 432 antibiotic use in upper respiratory tract infection and gastroenteritis. *Infection control and hospital*  
34 433 *epidemiology* 2021;**42**:280–6. doi:10.1017/ICE.2020.427  
35
- 36 434 38 Neuman MI, Hall M, Hersh AL, *et al*. Influence of hospital guidelines on management of children  
37 435 hospitalized with pneumonia. *Pediatrics* 2012;**130**:823–30. doi:10.1542/PEDS.2012-1285  
38
- 39 436 39 Jenkins TC, Irwin A, Coombs L, *et al*. Effects of Clinical Pathways for Common Outpatient Infections  
40 437 on Antibiotic Prescribing. *The American journal of medicine* 2013;**126**:327.  
41 438 doi:10.1016/J.AMJMED.2012.10.027  
42
- 43 439 40 Foolad F, Nagel JL, Eschenauer G, *et al*. Disease-based antimicrobial stewardship: A review of active  
44 440 and passive approaches to patient management. *Journal of Antimicrobial Chemotherapy*  
45 441 2017;**72**:3232–44. doi:10.1093/jac/dkx266  
46
- 47 442 41 *Integrated Management of Childhood Illness*. Geneva: : World Health Organization 2005.  
48 443 <http://apps.who.int/iris/bitstream/10665/42939/1/924154644>  
49
- 50 444 42 *The Treatment of diarrhea: a manual for physicians and other senior health workers*. 4th revision.  
51 445 Geneva: : World Health Organization 2005. doi:10.1097/00007611-192408000-00004  
52  
53  
54  
55  
56  
57  
58  
59  
60

- 1  
2  
3 446 43 Luisa M, Amore CD, Ceradini J, *et al.* Prevalence of antibiotic use in a tertiary care hospital in Italy ,  
4 447 2008 – 2016. *Italian Journal of Pediatrics* 2019;**7**:1–8.
- 6 448 44 Novan P, Primadi A, Mahfudz M, *et al.* Comparison of antibiotic prescriptions in adults and children  
7 449 with upper respiratory tract infections in Bangka Tengah primary health care centers Abstract :  
9 450 *Journal of Basic and Clinical Pharmacology* 2020;**30**:1–4. doi:10.1515/jbcpp-2019-0248
- 11 451 45 Seni J, Mapunjo SG, Wittenauer R, *et al.* Antimicrobial use across six referral hospitals in Tanzania: a  
12 452 point prevalence survey. *BMJ Open* 2020;**10**. doi:10.1136/bmjopen-2020-042819
- 14 453 46 Beckett CL, Harbarth S, Huttner B. Special considerations of antibiotic prescription in the geriatric  
15 454 population. *Clinical Microbiology and Infection*. 2015;**21**:3. doi:10.1016/j.cmi.2014.08.018
- 17 455 47 Donà D, Barbieri E, Daverio M, *et al.* Implementation and impact of pediatric antimicrobial  
18 456 stewardship programs: a systematic scoping review. *Antimicrobial Resistance and Infection Control*  
19 457 2020;**9**. doi:10.1186/s13756-019-0659-3
- 22 458 48 Probst V, Islamovic F, Mirza A. Antimicrobial stewardship program in pediatric medicine. *Pediatric*  
23 459 *investigation* 2021;**5**:229–38. doi:10.1002/ped4.12292
- 25 460 49 Kinoshita N, Komura M, Tsuzuki S, *et al.* The effect of preauthorization and prospective audit and  
26 461 feedback system on oral antimicrobial prescription for outpatients at a children’s hospital in Japan.  
27 462 *Journal of Infection and Chemotherapy* 2020;**26**:582–7. doi:10.1016/j.jiac.2020.01.013
- 29 463 50 Bagga B, Stultz JS, Arnold S, *et al.* A Culture Change: Impact of a Pediatric Antimicrobial Stewardship  
30 464 Program Based on Guideline Implementation and Prospective Audit with Feedback. *Antibiotics*  
31 465 (*Basel, Switzerland*) 2021;**10**. doi:10.3390/antibiotics10111307
- 33 466 51 Branstetter JW, Barker L, Yarbrough A, *et al.* Challenges of Antibiotic Stewardship in the Pediatric  
34 467 and Neonatal Intensive Care Units. *The journal of pediatric pharmacology and therapeutics : JPPT :  
36 468 the official journal of PPAG* 2021;**26**:659–68. doi:10.5863/1551-6776-26.7.659
- 38 469 52 Liu C, Liu C, Wang D, *et al.* Intrinsic and external determinants of antibiotic prescribing: A multi-level  
39 470 path analysis of primary care prescriptions in Hubei, China. *Antimicrobial Resistance and Infection*  
40 471 *Control* 2019;**8**. doi:10.1186/s13756-019-0592-5
- 42 472 53 Roumie CL, Halasa NB, Edwards KM, *et al.* Differences in antibiotic prescribing among physicians,  
43 473 residents, and nonphysician clinicians. *American Journal of Medicine* 2005;**118**:641–8.  
44 474 doi:10.1016/j.amjmed.2005.02.013
- 46 475 54 Doron S, Davidson LE. Antimicrobial Stewardship. *Mayo Clinic Proceedings* 2011;**86**:1113.  
48 476 doi:10.4065/MCP.2011.0358
- 50 477 55 Regev-Yochay G, Raz M, Dagan R, *et al.* Reduction in Antibiotic Use Following a Cluster Randomized  
51 478 Controlled Multifaceted Intervention: The Israeli Judicious Antibiotic Prescription Study. *Clinical*  
52 479 *Infectious Diseases* 2011;**53**:33–41. doi:10.1093/CID/CIR272
- 54 480 56 Weiss K, Blais R, Fortin A, *et al.* Impact of a Multipronged Education Strategy on Antibiotic  
55 481 Prescribing in Quebec, Canada. *Clinical Infectious Diseases* 2011;**53**:433–9. doi:10.1093/CID/CIR409

- 1  
2  
3 482 57 Mohlala G, Peltzer K, Phaswana-Mafuya N, *et al.* Drug prescription habits in public and private  
4 483 health facilities in 2 provinces in South Africa. *Eastern Mediterranean Health Journal* 2010;**16**:324–8.  
5 484 doi:10.26719/2010.16.3.324  
6  
7 485 58 Cotta MO, Chen C, Tacey M, *et al.* What are the similarities and differences in antimicrobial  
8 486 prescribing between Australian public and private hospitals? *Internal medicine journal*  
9 487 2016;**46**:1182–8. doi:10.1111/IMJ.13209  
10  
11 488 59 Bediako-bowan AAA, Owusu E, Labi A, *et al.* Antibiotic use in surgical units of selected hospitals in  
12 489 Ghana : a multi-centre point prevalence survey. *BMC Public Health* 2019;**19**:1–10.  
13  
14

15 490

16  
17  
18 491 Figure 1. Receipt of an antibiotic prescription by age group  
19

20 492 Figure 2. Receipt of an antibiotic prescription by the level of health facility  
21

22  
23 493 Figure 3. Receipt an antibiotic prescription by prescriber qualification  
24

25  
26 494  
27  
28  
29  
30  
31  
32  
33  
34  
35  
36  
37  
38  
39  
40  
41  
42  
43  
44  
45  
46  
47  
48  
49  
50  
51  
52  
53  
54  
55  
56  
57  
58  
59  
60

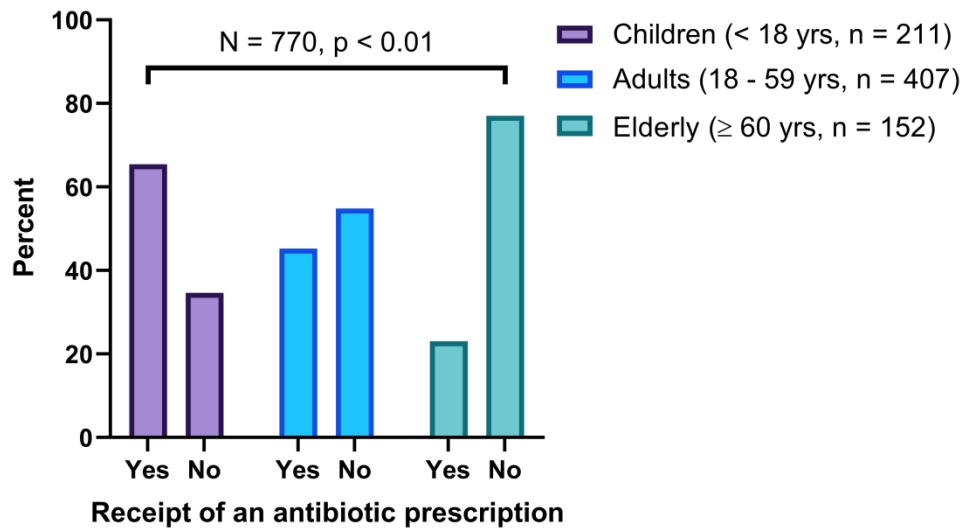

Figure 1. Receipt of an antibiotic prescription by age group

152x88mm (600 x 600 DPI)

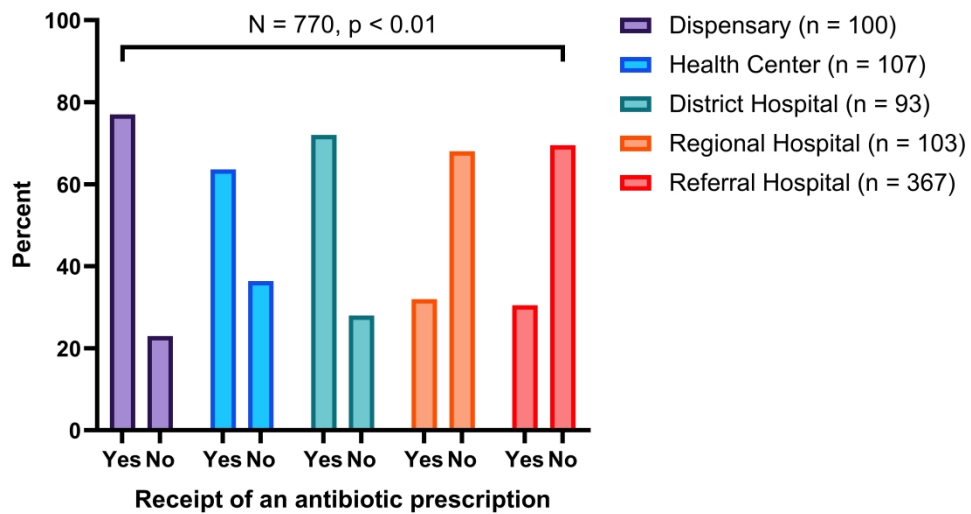

Figure 2. Receipt of an antibiotic prescription by the level of health facility

173x96mm (600 x 600 DPI)

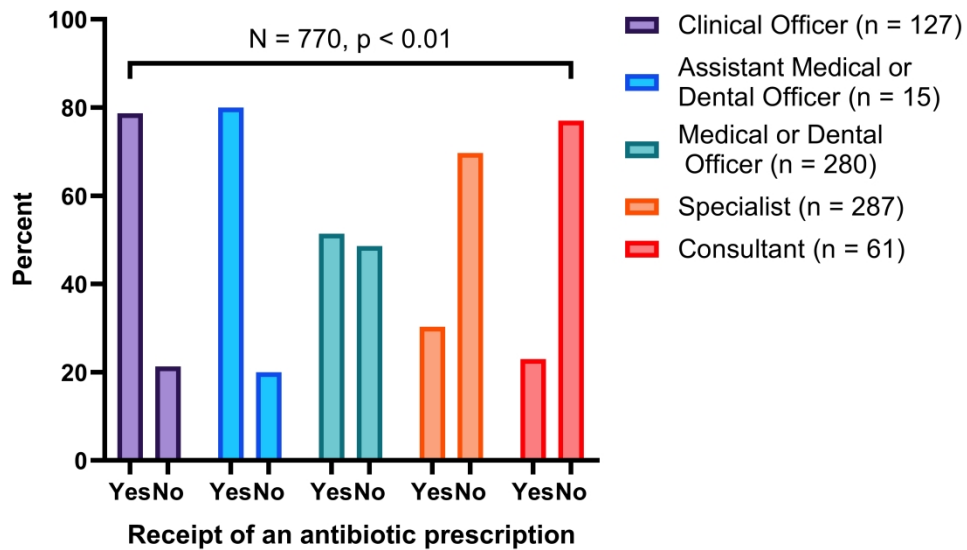

Figure 3. Receipt an antibiotic prescription by prescriber qualification

160x96mm (600 x 600 DPI)

**Supplement 1: Frequency distribution of all study variables**

| <b>Characteristic</b>                                               | <b>n (%)</b> |
|---------------------------------------------------------------------|--------------|
| <b>Age in years (N = 993)</b>                                       |              |
| Mean (SD) = 36.3 (23.2), Median = 37.0                              |              |
| Children (< 18 years)                                               | 264 (26.6)   |
| Adults (18-59 years)                                                | 535 (53.9)   |
| Elderly ( $\geq$ 60 years)                                          | 194 (19.5)   |
| <b>Sex (N = 993)</b>                                                |              |
| Male                                                                | 412 (41.5)   |
| Female                                                              | 581 (58.5)   |
| <b>Level of health facility (N = 993)</b>                           |              |
| Dispensary                                                          | 102 (10.3)   |
| Health Centre/Stand-alone clinic by Assistant Dental Officer        | 119 (12.0)   |
| District Hospital/Clinic Level1 by Medical/Dental Officer           | 101 (10.2)   |
| Regional Hospital/Clinic Level 2 by specialist                      | 123 (12.4)   |
| Referral/National/Zonal Hospital/Clinic Level 3 by super specialist | 548 (55.2)   |
| <b>Ownership of health facility (N = 993)</b>                       |              |
| Public                                                              | 468 (47.1)   |
| Private/Nongovernmental                                             | 525 (52.9)   |
| <b>Department visited (N = 993)</b>                                 |              |
| Outpatient                                                          | 975 (98.2)   |
| Inpatient                                                           | 18 (1.8)     |
| <b>Diagnosis code (N = 993)</b>                                     |              |
| Other disorders of urinary system                                   | 102 (10.3)   |
| Essential (primary) hypertension                                    | 81 (8.2)     |
| Acute and URTI of multiple and unspecified sites                    | 65 (6.5)     |
| Type 2 diabetes mellitus                                            | 51 (5.1)     |
| Spondylosis                                                         | 42 (4.2)     |
| Hypertensive Heart Disease                                          | 42 (4.2)     |
| Gastritis and duodenitis                                            | 39 (3.9)     |
| Disorders of lipoprotein metabolism and other lipidemias            | 36 (3.6)     |
| Pain, not elsewhere classified                                      | 33 (3.3)     |
| Iron deficiency anaemia                                             | 31 (3.1)     |
| Dermatophytosis                                                     | 31 (3.1)     |
| Vasomotor and allergic rhinitis                                     | 27 (2.7)     |
| Atopic dermatitis                                                   | 27 (2.7)     |
| Other sepsis                                                        | 25 (2.5)     |

Key; RefH, Referral Hospital, L1C, Level 1 Clinic; L2C, Level 2 Clinic



**Supplement 1: Frequency distribution of all study variables (continued)**

| <b>Characteristic (N = 993)</b>                                       | <b>n (%)</b> |
|-----------------------------------------------------------------------|--------------|
| Iron deficiency anaemia                                               | 31 (3.1)     |
| Dermatophytosis                                                       | 31 (3.1)     |
| Vasomotor and allergic rhinitis                                       | 27 (2.7)     |
| Atopic dermatitis                                                     | 27 (2.7)     |
| Other sepsis                                                          | 25 (2.5)     |
| Acute nasopharyngitis (common cold)                                   | 24 (2.4)     |
| Acute tonsillitis                                                     | 24 (2.4)     |
| Asthma                                                                | 23 (2.3)     |
| Malaria, unspecified                                                  | 23 (2.3)     |
| PUD, site unspecified                                                 | 22 (2.2)     |
| Chronic kidney disease                                                | 18 (1.8)     |
| Complications of analgesics, antipyretics and anti-inflammatory drugs | 18 (1.8)     |
| Plasmodium falciparum                                                 | 16 (1.6)     |
| Conjunctivitis                                                        | 16 (1.6)     |
| Diseases of pulp and periapical tissues                               | 17 (1.7)     |
| Cough                                                                 | 16 (1.6)     |
| Hookworm disease                                                      | 14 (1.4)     |
| Candidiasis                                                           | 14 (1.4)     |
| Other vitamin deficiency                                              | 14 (1.4)     |
| Chronic diseases of tonsils and adenoids                              | 14 (1.4)     |
| Other joint disorders, not elsewhere classified                       | 14 (1.4)     |
| Gonarthrosis (arthrosis of knee)                                      | 13 (1.3)     |
| Supervision of normal pregnancy                                       | 13 (1.3)     |
| Dental caries                                                         | 13 (1.3)     |
| Bacterial infection of unspecified site                               | 11 (1.1)     |
| Deficiency of other nutrient elements                                 | 11 (1.1)     |
| Pneumonia, unspecified organism                                       | 11 (1.1)     |
| Other deforming dorsopathies                                          | 11 (1.1)     |
| Epilepsy                                                              | 10 (1.0)     |
| Cystitis                                                              | 10 (1.0)     |
| Chronic viral hepatitis                                               | 10 (1.0)     |
| Acute bronchitis                                                      | 10 (1.0)     |
| Hyperplasia of prostate                                               | 10 (1.0)     |
| Deficiency of other B group vitamins                                  | 9 (0.9)      |

**Supplement 1: Frequency distribution of all study variables (Continued)**

| <b>Characteristic (N = 993)</b>                                        | <b>n (%)</b> |
|------------------------------------------------------------------------|--------------|
| Disorders of refraction and accommodation                              | 9 (0.9)      |
| Other arthritis                                                        | 8 (0.8)      |
| Headache                                                               | 9 (0.9)      |
| Ascariasis                                                             | 8 (0.8)      |
| Other disorders of fluid, electrolyte and acid-base balance            | 8 (0.8)      |
| Gingivitis and periodontal diseases                                    | 8 (0.8)      |
| Gastro-oesophageal reflux disease                                      | 8 (0.8)      |
| Gout                                                                   | 8 (0.8)      |
| Other female pelvic inflammatory diseases                              | 8 (0.8)      |
| Other disorders of bladder                                             | 7 (0.7)      |
| Amoebiasis                                                             | 7 (0.7)      |
| Other gastroenteritis and colitis of infectious and unspecified origin | 7 (0.7)      |
| Other anemias                                                          | 7 (0.7)      |
| Other hypothyroidism                                                   | 7 (0.7)      |
| Cardiomyopathy                                                         | 7 (0.7)      |
| Other functional intestinal disorders                                  | 7 (0.7)      |
| Allergic contact dermatitis                                            | 7 (0.7)      |
| Dorsalgia                                                              | 6 (0.6)      |
| Nerve root and plexus compressions in diseases classified elsewhere    | 6 (0.6)      |
| Malaise and fatigue                                                    | 6 (0.6)      |
| Other helminthiasis                                                    | 6 (0.6)      |
| Other superficial mycoses                                              | 6 (0.6)      |
| Type 1 diabetes mellitus                                               | 6 (0.6)      |
| Other polyneuropathies                                                 | 6 (0.6)      |
| Heart failure                                                          | 6 (0.6)      |
| Acute pharyngitis                                                      | 6 (0.6)      |
| Bacterial pneumonia, not elsewhere classified                          | 6 (0.6)      |
| Unspecified acute lower respiratory infection                          | 6 (0.6)      |
| Other diseases of upper respiratory tract                              | 6 (0.6)      |
| Cellulitis                                                             | 6 (0.6)      |
| Other disorders of external ear                                        | 6 (0.6)      |
| Unspecified intestinal parasitism                                      | 5 (0.5)      |
| Malignant neoplasm of the breast                                       | 5 (0.5)      |
| Leiomyoma of the uterus                                                | 5 (0.5)      |
| Inflammatory polyneuropathy                                            | 5 (0.5)      |

**Supplement 1: Frequency distribution of all study variables (continued)**

| <b>Characteristic (N = 993)</b>                                | <b>n (%)</b> |
|----------------------------------------------------------------|--------------|
| Glaucoma                                                       | 5 (0.5)      |
| Secondary hypertension                                         | 5 (0.5)      |
| Other diseases of hard tissues of teeth                        | 5 (0.5)      |
| Irritable bowel syndrome                                       | 5 (0.5)      |
| Arthrosis of first carpometacarpal joint                       | 5 (0.5)      |
| Other disorders of muscle                                      | 5 (0.5)      |
| Excessive vomiting in pregnancy                                | 5 (0.5)      |
| Nausea and vomiting                                            | 5 (0.5)      |
| Infections of genitourinary tract in pregnancy                 | 4 (0.4)      |
| Varicella (chickenpox)                                         | 4 (0.4)      |
| Malignant neoplasm of the prostate                             | 4 (0.4)      |
| Sickle cell disorders                                          | 4 (0.4)      |
| Coagulation defect, unspecified                                | 4 (0.4)      |
| Cervical disc disorders                                        | 4 (0.4)      |
| Other retinal disorders                                        | 4 (0.4)      |
| Otitis externa                                                 | 4 (0.4)      |
| Disorders of vestibular function                               | 4 (0.4)      |
| Chronic ischemic heart disease                                 | 4 (0.4)      |
| Chronic rhinitis, nasopharyngitis and pharyngitis              | 4 (0.4)      |
| Dental facial anomalies (including malocclusion)               | 4 (0.4)      |
| Cutaneous abscess, furuncle and carbuncle                      | 4 (0.4)      |
| Other soft tissues disorders, not elsewhere classified         | 4 (0.4)      |
| Single delivery by caesarean section                           | 4 (0.4)      |
| Congenital malformation of cardiac septa                       | 4 (0.4)      |
| Abdominal and pelvic pain                                      | 4 (0.4)      |
| Open wound of the forearm                                      | 4 (0.4)      |
| Fever of other and unknown origin                              | 4 (0.4)      |
| Fracture of lower leg, including ankle                         | 4 (0.4)      |
| Dislocation, sprain and strain of joints and ligaments of knee | 4 (0.4)      |
| Other intervertebral disc disorders                            | 3 (0.3)      |
| Coxarthrosis (arthrosis of hip)                                | 3 (0.3)      |
| Polyarthrosis                                                  | 3 (0.3)      |
| Acne                                                           | 3 (0.3)      |
| Urticaria                                                      | 3 (0.3)      |
| Other parasitologically confirmed malaria                      | 3 (0.3)      |

**Supplement 1: Frequency distribution of all study variables (continued)**

| <b>Characteristic (N = 993)</b>                            | <b>n (%)</b> |
|------------------------------------------------------------|--------------|
| Trichomoniasis                                             | 3 (0.3)      |
| Other bacterial Intestinal Infections                      | 3 (0.3)      |
| Herpes Simplex Infection                                   | 3 (0.3)      |
| HIV disease resulting in infectious and parasitic diseases | 3 (0.3)      |
| Malignant neoplasm of colon                                | 3 (0.3)      |
| Malignant neoplasm of cervix uteri                         | 3 (0.3)      |
| Haemangioma and lymphangioma, any site                     | 3 (0.3)      |
| Thyrotoxicosis                                             | 3 (0.3)      |
| Vitamin D deficiency                                       | 3 (0.3)      |
| Disorders of mineral metabolism                            | 3 (0.3)      |
| Hereditary and idiopathic neuropathy                       | 3 (0.3)      |
| Senile cataract                                            | 3 (0.3)      |
| Duodenal ulcer                                             | 3 (0.3)      |
| Impetigo                                                   | 3 (0.3)      |
| Other dermatitis                                           | 3 (0.3)      |
| Internal derangement of knee                               | 3 (0.3)      |
| Osteomyelitis                                              | 3 (0.3)      |
| Acute renal failure                                        | 3 (0.3)      |
| Other general symptoms and signs                           | 3 (0.3)      |
| Other abnormal findings of blood chemistry                 | 3 (0.3)      |
| Presence of prosthetic heart valve                         | 3 (0.3)      |
| Fracture of femur                                          | 2 (0.2)      |
| Other dorsopathies, not elsewhere classified               | 2 (0.2)      |
| Other spondylopathies                                      | 2 (0.2)      |
| Psoriasis                                                  | 2 (0.2)      |
| Seborrheic dermatitis                                      | 2 (0.2)      |
| Diphyllobothriasis and sparganosis                         | 2 (0.2)      |
| Scabies                                                    | 2 (0.2)      |
| Streptococcal sepsis                                       | 2 (0.2)      |
| Miliary tuberculosis                                       | 2 (0.2)      |
| Typhoid and paratyphoid fevers                             | 2 (0.2)      |
| Unspecified HIV disease                                    | 2 (0.2)      |
| Viral infection of unspecified site                        | 2 (0.2)      |
| Myiasis                                                    | 2 (0.2)      |

**Supplement 1: Frequency distribution of all study variables (continued)**

| <b>Characteristic (N = 993)</b>                                                 | <b>n (%)</b> |
|---------------------------------------------------------------------------------|--------------|
| Streptococcus and staphylococcus as the cause of diseases classified elsewhere  | 2 (0.2)      |
| Other specified infectious agents as the cause of diseases classified elsewhere | 2 (0.2)      |
| Malignant neoplasm of esophagus                                                 | 2 (0.2)      |
| Malignant neoplasm of penis                                                     | 2 (0.2)      |
| Malignant neoplasm of thyroid gland                                             | 2 (0.2)      |
| Benign lipomatous neoplasm                                                      | 2 (0.2)      |
| Benign neoplasm of thyroid gland                                                | 2 (0.2)      |
| Vitamin B12 deficiency anemia                                                   | 2 (0.2)      |
| Other nutritional anemias                                                       | 2 (0.2)      |
| Purpura and other haemorrhagic conditions                                       | 2 (0.2)      |
| Other disorders of white blood cells                                            | 2 (0.2)      |
| Other specified diabetes mellitus                                               | 2 (0.2)      |
| Unspecified diabetes mellitus                                                   | 2 (0.2)      |
| Hyperprolactinemia                                                              | 2 (0.2)      |
| Disorders of purine and pyrimidine metabolism                                   | 2 (0.2)      |
| Schizophrenia                                                                   | 2 (0.2)      |
| Migraine                                                                        | 2 (0.2)      |
| Other headache syndromes                                                        | 2 (0.2)      |
| Disorders of autonomic nervous system                                           | 2 (0.2)      |
| Other inflammation of the eyelid                                                | 2 (0.2)      |
| Other disorders of conjunctiva                                                  | 2 (0.2)      |
| Nonsuppurative otitis media                                                     | 2 (0.2)      |
| Suppurative and unspecified otitis media                                        | 2 (0.2)      |
| Other rheumatic heart disease                                                   | 2 (0.2)      |
| Pulmonary embolism                                                              | 2 (0.2)      |
| Acute and subacute infective endocarditis                                       | 2 (0.2)      |
| Cerebral infarction                                                             | 2 (0.2)      |
| Stroke, not specified as hemorrhage or infarction                               | 2 (0.2)      |
| Other venous embolism and thrombosis                                            | 2 (0.2)      |
| Hemorrhoids                                                                     | 2 (0.2)      |
| Hypotension                                                                     | 2 (0.2)      |
| Acute sinusitis                                                                 | 2 (0.2)      |
| Pneumonia due to <i>H. influenza</i>                                            | 2 (0.2)      |
| Acute bronchiolitis                                                             | 2 (0.2)      |

**Supplement 1: Frequency distribution of all study variables (continued)**

| <b>Characteristic (N = 993)</b>                                                                     | <b>n (%)</b> |
|-----------------------------------------------------------------------------------------------------|--------------|
| Chronic sinusitis                                                                                   | 2 (0.2)      |
| Nasal polyp                                                                                         | 2 (0.2)      |
| Respiratory disorders in diseases classified elsewhere                                              | 2 (0.2)      |
| Gastric ulcer                                                                                       | 2 (0.2)      |
| Inguinal hernia                                                                                     | 2 (0.2)      |
| Umbilical hernia                                                                                    | 2 (0.2)      |
| Other diseases of the liver                                                                         | 2 (0.2)      |
| Pruritus                                                                                            | 2 (0.2)      |
| Nephrotic syndrome                                                                                  | 2 (0.2)      |
| Calculus of kidney and ureter                                                                       | 2 (0.2)      |
| Other disorders of kidney and ureter in diseases classified elsewhere                               | 2 (0.2)      |
| Urethral stricture                                                                                  | 2 (0.2)      |
| Excessive, frequent and irregular menstruation                                                      | 2 (0.2)      |
| Abnormal uterine and vaginal bleeding, unspecified                                                  | 2 (0.2)      |
| Female infertility                                                                                  | 2 (0.2)      |
| Threatened abortion                                                                                 | 2 (0.2)      |
| Perineal laceration during delivery                                                                 | 2 (0.2)      |
| Single spontaneous delivery                                                                         | 2 (0.2)      |
| Anaemia complicating pregnancy, childbirth and the puerperium                                       | 2 (0.2)      |
| Congenital malformation of the great arteries                                                       | 2 (0.2)      |
| Abnormalities of heart beat                                                                         | 2 (0.2)      |
| Other symptoms and signs involving the digestive system and abdomen                                 | 2 (0.2)      |
| Abnormal involuntary movements                                                                      | 2 (0.2)      |
| Dislocation, sprain and strain of joints and ligaments of lumbar spine and pelvis                   | 2 (0.2)      |
| Fracture of shoulder and upper arm                                                                  | 2 (0.2)      |
| Fracture of lower end of radius                                                                     | 2 (0.2)      |
| Dislocation of wrist                                                                                | 2 (0.2)      |
| Open wound of lower leg                                                                             | 2 (0.2)      |
| Poisoning by local antifungal, anti-infective and anti-inflammatory drugs, not elsewhere classified | 2 (0.2)      |
| Allergy, unspecified                                                                                | 2 (0.2)      |
| Supervision of high-risk pregnancy, unspecified                                                     | 2 (0.2)      |
| Health supervision and care of other healthy infant and child                                       | 2 (0.2)      |
| Spastic quadriplegic cerebral palsy                                                                 | 1 (0.1)      |
| Dengue fever (classical dengue)                                                                     | 1 (0.1)      |

---

**Supplement 1: Frequency distribution of all study variables (continued)**


---

| <b>Characteristic (N = 993)</b>                                                                                                                                   | <b>n (%)</b> |
|-------------------------------------------------------------------------------------------------------------------------------------------------------------------|--------------|
| Open wound of abdomen, lower back and pelvis                                                                                                                      | 1 (0.1)      |
| Sensorineural hearing loss, bilateral                                                                                                                             | 1 (0.1)      |
| Antenatal screening                                                                                                                                               | 1 (0.1)      |
| Pregnancy confirmed                                                                                                                                               | 1 (0.1)      |
| Contact with and exposure to communicable diseases                                                                                                                | 1 (0.1)      |
| Routine general health check-up of defined subpopulation                                                                                                          | 1 (0.1)      |
| Other medical procedures as the cause of abnormal reaction of the patient, or of later complication, without mention of misadventure at the time of the procedure | 1 (0.1)      |
| Hanging, strangulation and suffocation, undetermined intent                                                                                                       | 1 (0.1)      |
| Intentional self-harm by jumping from a high place                                                                                                                | 1 (0.1)      |
| Exposure to discharge of firework                                                                                                                                 | 1 (0.1)      |
| Poisoning by antihyperlipidaemic and antiarteriosclerotic drugs                                                                                                   | 1 (0.1)      |
| Poisoning by hormones and their synthetic substitutes and antagonists, not elsewhere classified                                                                   | 1 (0.1)      |
| Poisoning by antiviral drug                                                                                                                                       | 1 (0.1)      |
| Poisoning by antifungals and antibiotics, systemically used                                                                                                       | 1 (0.1)      |
| Corrosions classified according to extent of body surface involved                                                                                                | 1 (0.1)      |
| Burns classified according to extent of body surface involved                                                                                                     | 1 (0.1)      |
| Burn of first degree of wrist and hand                                                                                                                            | 1 (0.1)      |
| Injury of unspecified muscle and tendon of lower limb, level unspecified                                                                                          | 1 (0.1)      |
| Fracture of other toe                                                                                                                                             | 1 (0.1)      |
| Open wound of other parts of foot                                                                                                                                 | 1 (0.1)      |
| Superficial injury of hip and thigh, unspecified                                                                                                                  | 1 (0.1)      |
| Other and unspecified injuries of wrist and hand                                                                                                                  | 1 (0.1)      |
| Sprain and strain of wrist                                                                                                                                        | 1 (0.1)      |
| Superficial injury of wrist and hand                                                                                                                              | 1 (0.1)      |
| Injury of muscle(s) and tendon(s) of the rotator cuff                                                                                                             | 1 (0.1)      |
| Superficial injury of shoulder and upper arm                                                                                                                      | 1 (0.1)      |
| Fracture of lumbar spine and pelvis                                                                                                                               | 1 (0.1)      |
| Intracranial injury                                                                                                                                               | 1 (0.1)      |
| Fracture of skull and facial bones                                                                                                                                | 1 (0.1)      |
| Open wound of the head                                                                                                                                            | 1 (0.1)      |
| Intracranial space-occupying lesion                                                                                                                               | 1 (0.1)      |
| Symptoms and signs concerning fluid intake                                                                                                                        | 1 (0.1)      |
| Dizziness and giddiness                                                                                                                                           | 1 (0.1)      |

---

**Supplement 1: Frequency distribution of all study variables (continued)**

| <b>Characteristic (N = 993)</b>                                                      | <b>n (%)</b> |
|--------------------------------------------------------------------------------------|--------------|
| Unspecified urinary incontinence                                                     | 1 (0.1)      |
| Painful micturition, unspecified                                                     | 1 (0.1)      |
| Abnormalities of gait and mobility                                                   | 1 (0.1)      |
| Rash and other nonspecific skin eruption                                             | 1 (0.1)      |
| Other specified symptoms and signs involving the circulatory and respiratory systems | 1 (0.1)      |
| Hemorrhage from respiratory passages                                                 | 1 (0.1)      |
| Gangrene, not elsewhere classified                                                   | 1 (0.1)      |
| Congenital posterior urethral valves                                                 | 1 (0.1)      |
| Polycystic kidney, unspecified                                                       | 1 (0.1)      |
| Congenital pulmonary valve stenosis                                                  | 1 (0.1)      |
| Congenital hydrocephalus                                                             | 1 (0.1)      |
| Hypoxic ischemic encephalopathy of newborn                                           | 1 (0.1)      |
| Maternal care for breach presentation                                                | 1 (0.1)      |
| Other specified pregnancy-related conditions                                         | 1 (0.1)      |
| Pre-eclampsia                                                                        | 1 (0.1)      |
| Pre-existing hypertension, complicating pregnancy, childbirth and the puerperium     | 1 (0.1)      |
| Blighted ovum and nonhydatiform mole                                                 | 1 (0.1)      |
| Habitual aborter                                                                     | 1 (0.1)      |
| Complete or unspecified abortion without complication                                | 1 (0.1)      |
| Secondary dysmenorrhea                                                               | 1 (0.1)      |
| Other inflammatory disorders of vagina                                               | 1 (0.1)      |
| Endometriosis                                                                        | 1 (0.1)      |
| Female pelvic inflammatory disorders in diseases classified elsewhere                | 1 (0.1)      |
| Inflammatory disorders of the breast                                                 | 1 (0.1)      |
| Impotence of organic origin                                                          | 1 (0.1)      |
| Redundant prepuce, phimosis and paraphimosis                                         | 1 (0.1)      |
| Orchitis and epididymitis                                                            | 1 (0.1)      |
| Hydrocele and spermatocele                                                           | 1 (0.1)      |
| Inflammatory diseases of the prostate                                                | 1 (0.1)      |
| Urethral disorders in diseases classified elsewhere                                  | 1 (0.1)      |
| Urethral caruncle                                                                    | 1 (0.1)      |
| Urethritis and urethral syndrome                                                     | 1 (0.1)      |
| Unspecified renal colic                                                              | 1 (0.1)      |
| Unspecified kidney failure                                                           | 1 (0.1)      |



---

**Supplement 1: Frequency distribution of all study variables (continued)**


---

| <b>Characteristic (N =993)</b>                                                                       | <b>n (%)</b> |
|------------------------------------------------------------------------------------------------------|--------------|
| Obstructive and reflux uropathy                                                                      | 1 (0.1)      |
| Hydronephrosis with ureteral stricture, not elsewhere classified                                     | 1 (0.1)      |
| Chronic nephritic syndrome                                                                           | 1 (0.1)      |
| Periprosthetic fracture around internal prosthetic joint                                             | 1 (0.1)      |
| Other disorders of bone density and structure                                                        | 1 (0.1)      |
| Short Achilles tendon (acquired)                                                                     | 1 (0.1)      |
| Spontaneous rupture of synovium and tendon                                                           | 1 (0.1)      |
| Discitis, unspecified                                                                                | 1 (0.1)      |
| Other acquired deformities of limbs                                                                  | 1 (0.1)      |
| Acquired deformities of fingers and toes                                                             | 1 (0.1)      |
| Arthrosis, unspecified                                                                               | 1 (0.1)      |
| Other specific arthropathies                                                                         | 1 (0.1)      |
| Seropositive rheumatoid arthritis                                                                    | 1 (0.1)      |
| Ulcer of lower limb, not elsewhere classified                                                        | 1 (0.1)      |
| Lichen planus                                                                                        | 1 (0.1)      |
| Unspecified contact dermatitis due to other chemical products                                        | 1 (0.1)      |
| Other local infection of skin and subcutaneous tissue                                                | 1 (0.1)      |
| Pilonidal cyst without abscess                                                                       | 1 (0.1)      |
| Cholelithiasis                                                                                       | 1 (0.1)      |
| Alcoholic hepatic failure                                                                            | 1 (0.1)      |
| Malignant neoplasm of rectum                                                                         | 1 (0.1)      |
| Malignant neoplasm of stomach                                                                        | 1 (0.1)      |
| Malignant neoplasm of liver and intrahepatic bile ducts                                              | 1 (0.1)      |
| Malignant neoplasm of other and ill-defined sites in the respiratory system and intrathoracic organs | 1 (0.1)      |
| HIV disease resulting in other specified diseases                                                    | 1 (0.1)      |
| Foodborne staphylococcal intoxication                                                                | 1 (0.1)      |
| Rotaviral enteritis                                                                                  | 1 (0.1)      |
| Other and unspecified syphilis                                                                       | 1 (0.1)      |
| Chlamydial infection of lower genitourinary tract                                                    | 1 (0.1)      |
| Anogenital herpesviral infection, unspecified                                                        | 1 (0.1)      |
| Anogenital (venereal) warts                                                                          | 1 (0.1)      |
| Unspecified sexually transmitted disease                                                             | 1 (0.1)      |
| Enteroviral exanthematous fever                                                                      | 1 (0.1)      |
| Other mosquito-borne viral fevers                                                                    | 1 (0.1)      |

---

**Supplement 1: Frequency distribution of all study variables (continued)**

| <b>Characteristic (N = 993)</b>                                                                    | <b>n (%)</b> |
|----------------------------------------------------------------------------------------------------|--------------|
| Measles without complications                                                                      | 1 (0.1)      |
| Other viral infections characterized by skin and mucous membrane lesions, not elsewhere classified | 1 (0.1)      |
| Unspecified viral hepatitis without hepatic coma                                                   | 1 (0.1)      |
| Subcutaneous phaeomycotic abscess and cyst                                                         | 1 (0.1)      |
| Other cestode infections                                                                           | 1 (0.1)      |
| Onchocerciasis                                                                                     | 1 (0.1)      |
| Strongyloidiasis                                                                                   | 1 (0.1)      |
| Trichiuriasis                                                                                      | 1 (0.1)      |
| Enterobiasis                                                                                       | 1 (0.1)      |
| Sequelae of tuberculosis                                                                           | 1 (0.1)      |
| Malignant neoplasm of the palate                                                                   | 1 (0.1)      |
| Malignant neoplasm of the tonsil, unspecified                                                      | 1 (0.1)      |
| Malignant neoplasm of piriform sinus                                                               | 1 (0.1)      |
| Malignant neoplasm of hypopharynx, unspecified                                                     | 1 (0.1)      |
| Malignant neoplasm of the bone and articular cartilage, unspecified                                | 1 (0.1)      |
| Kaposi sarcoma                                                                                     | 1 (0.1)      |
| Malignant neoplasm of peripheral nerves of lower limb, including hip                               | 1 (0.1)      |
| Malignant neoplasm of ovary                                                                        | 1 (0.1)      |
| Malignant neoplasm of the testis                                                                   | 1 (0.1)      |
| Malignant neoplasm of the kidney, except renal pelvis                                              | 1 (0.1)      |
| Malignant (primary) neoplasm, unspecified                                                          | 1 (0.1)      |
| Hodgkin lymphoma                                                                                   | 1 (0.1)      |
| Non-follicular lymphoma                                                                            | 1 (0.1)      |
| Mediastinal (thymic) large B-cell lymphoma                                                         | 1 (0.1)      |
| Other specified types T/NK-cell lymphoma                                                           | 1 (0.1)      |
| Chronic lymphocytic leukemia of B-cell type                                                        | 1 (0.1)      |
| Benign neoplasm of mouth and pharynx                                                               | 1 (0.1)      |
| Benign neoplasm of parotid gland                                                                   | 1 (0.1)      |
| Other benign neoplasms of connective and other soft tissue                                         | 1 (0.1)      |
| Benign neoplasm of the breast                                                                      | 1 (0.1)      |
| Benign neoplasm of the prostate                                                                    | 1 (0.1)      |
| Benign neoplasm of the brain and other parts of the central nervous system                         | 1 (0.1)      |
| Benign neoplasm of other and unspecified endocrine glands                                          | 1 (0.1)      |
| Folate deficiency anemia                                                                           | 1 (0.1)      |

---

**Supplement 1: Frequency distribution of all study variables (continued)**


---

| <b>Characteristic (N = 993)</b>                                     | <b>n (%)</b> |
|---------------------------------------------------------------------|--------------|
| Iodine-deficiency-related (endemic) goiter, unspecified             | 1 (0.1)      |
| Polycystic ovarian syndrome                                         | 1 (0.1)      |
| Vitamin A deficiency, unspecified                                   | 1 (0.1)      |
| Niacin deficiency (pellagra)                                        | 1 (0.1)      |
| Ascorbic acid deficiency                                            | 1 (0.1)      |
| Dietary calcium deficiency                                          | 1 (0.1)      |
| Lipid storage disorder, unspecified                                 | 1 (0.1)      |
| Mental and behavioral disorders due to use of alcohol               | 1 (0.1)      |
| Schizotypal disorder                                                | 1 (0.1)      |
| Mild depressive episode                                             | 1 (0.1)      |
| Recurrent depressive disorder                                       | 1 (0.1)      |
| Unspecified mental retardation                                      | 1 (0.1)      |
| Secondary parkinsonism, unspecified                                 | 1 (0.1)      |
| Essential tremor                                                    | 1 (0.1)      |
| Other demyelinating diseases of central nervous system              | 1 (0.1)      |
| Nerve root and plexus disorder, unspecified                         | 1 (0.1)      |
| Diabetic polyneuropathy                                             | 1 (0.1)      |
| Other specified disorders of brain in diseases classified elsewhere | 1 (0.1)      |
| Other disorders of nervous system in diseases classified elsewhere  | 1 (0.1)      |
| Disorders of lacrimal system                                        | 1 (0.1)      |
| Disorders of orbit                                                  | 1 (0.1)      |
| Chorioretinal inflammation                                          | 1 (0.1)      |
| Diabetic retinopathy                                                | 1 (0.1)      |
| Disorders of globe                                                  | 1 (0.1)      |
| Optic atrophy                                                       | 1 (0.1)      |
| Otitis externa in mycoses                                           | 1 (0.1)      |
| Hearing loss, unspecified                                           | 1 (0.1)      |
| Hypertensive heart and renal disease                                | 1 (0.1)      |
| Angina pectoris                                                     | 1 (0.1)      |
| Other nonrheumatic mitral valve disorders                           | 1 (0.1)      |
| Endocarditis, valve unspecified                                     | 1 (0.1)      |
| Other conduction disorders                                          | 1 (0.1)      |
| Other cardiac arrhythmias                                           | 1 (0.1)      |
| Other cerebrovascular diseases                                      | 1 (0.1)      |
| Abdominal aortic aneurysm, ruptured                                 | 1 (0.1)      |

---

**Supplement 1: Frequency distribution of all study variables (continued)**

| <b>Characteristic (N = 993)</b>                                           | <b>n (%)</b> |
|---------------------------------------------------------------------------|--------------|
| Phlebitis and thrombophlebitis of femoral vein                            | 1 (0.1)      |
| Post procedural disorders of circulatory system, not elsewhere classified | 1 (0.1)      |
| Influenza due to identified seasonal influenza virus                      | 1 (0.1)      |
| Influenza, virus not identified                                           | 1 (0.1)      |
| Pneumonia due to other specified infectious organisms                     | 1 (0.1)      |
| Peritonsillar abscess                                                     | 1 (0.1)      |
| Unspecified chronic bronchitis                                            | 1 (0.1)      |
| Status asthmaticus                                                        | 1 (0.1)      |
| Hypersensitivity pneumonitis due to organic dust                          | 1 (0.1)      |
| Pneumonitis due to solids and liquids                                     | 1 (0.1)      |
| Adult respiratory distress syndrome                                       | 1 (0.1)      |
| Other disorders of tooth development                                      | 1 (0.1)      |
| Impacted teeth                                                            | 1 (0.1)      |
| Disorders of teeth and supporting structures, unspecified                 | 1 (0.1)      |
| Other cysts of jaw                                                        | 1 (0.1)      |
| Other diseases of jaws                                                    | 1 (0.1)      |
| Other diseases of lip and oral mucosa                                     | 1 (0.1)      |
| Esophagitis                                                               | 1 (0.1)      |
| Functional dyspepsia                                                      | 1 (0.1)      |
| Acute appendicitis                                                        | 1 (0.1)      |
| Incisional hernia without obstruction or gangrene                         | 1 (0.1)      |
| Other abdominal hernia                                                    | 1 (0.1)      |
| Ulcerative (chronic) pancolitis                                           | 1 (0.1)      |
| Other specified noninfective gastroenteritis and colitis                  | 1 (0.1)      |
| Anal fissure, unspecified                                                 | 1 (0.1)      |
| Anorectal fistula                                                         | 1 (0.1)      |
| Chronic hepatitis, not elsewhere classified                               | 1 (0.1)      |
| <b>Any Procedure/Surgery done (N = 993)</b>                               |              |
| No                                                                        | 940 (94.7)   |
| Yes                                                                       | 53 (5.3)     |
| <b>Type of Procedure/Surgery (N = 53)</b>                                 |              |
| Minor                                                                     | 25 (47.2)    |
| Major                                                                     | 7 (13.2)     |
| Specialized                                                               | 21 (39.6)    |

---

**Supplement 1: Frequency distribution of all study variables (continued)**


---

| Characteristic                                                     | n (%)      |
|--------------------------------------------------------------------|------------|
| <b>Length of stay in days (n = 17)</b>                             |            |
| Mean (SD) = 6.1 (5.7), Median = 3                                  |            |
| 1                                                                  | 3 (17.6)   |
| 2                                                                  | 4 (23.5)   |
| 3                                                                  | 2 (11.8)   |
| 5                                                                  | 1 (5.9)    |
| 6                                                                  | 1 (5.9)    |
| 7                                                                  | 1 (5.9)    |
| 8                                                                  | 1 (5.9)    |
| 14                                                                 | 2 (11.8)   |
| 15                                                                 | 1 (5.9)    |
| 18                                                                 | 1 (5.9)    |
| <b>Prescriber Qualification (N = 993)</b>                          |            |
| Clinical Officer/Dental Therapist                                  | 132 (13.3) |
| Assistant Medical/Dental Officer                                   | 18 (1.8)   |
| Medical/Dental Officer                                             | 320 (32.2) |
| Specialist                                                         | 437 (44.0) |
| Super-specialist/Consultant                                        | 86 (8.7)   |
| <b>Prescriber Qualification Grouped (N = 993)</b>                  |            |
| Low level (Clinical Officers or Assistant Medical/Dental Officers) | 150 (15.1) |
| Mid-level (Doctor of Medicine/Doctor of Dental Surgery)            | 320 (32.2) |
| High level (Specialists/Consultants)                               | 523 (52.7) |
| <b>Any Medication Prescribed (N = 993)</b>                         |            |
| No                                                                 | 223 (22.5) |
| Yes                                                                | 770 (77.5) |
| <b>Number of Medications in the prescription (N = 770)</b>         |            |
| Mean (SD) = 3.0 (1.7), Median = 3.0                                |            |
| 1                                                                  | 117 (15.2) |
| 2                                                                  | 209 (27.1) |
| 3                                                                  | 212 (27.5) |
| 4                                                                  | 118 (15.3) |
| 5                                                                  | 55 (7.1)   |
| 6                                                                  | 39 (5.1)   |
| 7                                                                  | 11 (1.4)   |
| 8                                                                  | 6 (0.8)    |
| 10                                                                 | 2 (0.3)    |

---

| <b>Supplement 1: Frequency distribution of all study variables (continued)</b>                     |              |
|----------------------------------------------------------------------------------------------------|--------------|
| <b>Characteristic (N = 770)</b>                                                                    | <b>n (%)</b> |
| 13                                                                                                 | 1 (0.1)      |
| <b>Polypharmacy of &gt; 3 Medications</b>                                                          |              |
| No                                                                                                 | 538 (69.9)   |
| Yes                                                                                                | 232 (30.1)   |
| <b>Polypharmacy of <math>\geq</math> 5 Medications</b>                                             |              |
| No                                                                                                 | 657 (85.3)   |
| Yes                                                                                                | 113 (14.7)   |
| <b>Receipt of an antibiotic prescription (N = 770)</b>                                             |              |
| No                                                                                                 | 413 (53.6)   |
| Yes                                                                                                | 357 (46.4)   |
| <b>Receipt of more than one antibiotic prescription (N = 357)</b>                                  |              |
| No                                                                                                 | 286 (80.1)   |
| Yes                                                                                                | 70 (19.6)    |
| <b>Antibiotics prescribed according to TZ STG2017 recommendation with respect to HFL (N = 357)</b> |              |
| No                                                                                                 | 28 (7.8)     |
| Yes                                                                                                | 329 (92.2)   |

**Supplement 2: Study characteristics by receipt of antibiotic prescription**

| <b>Characteristic (N = 770)</b>                         | <b>Antibiotic prescription, n (%)</b> |            | <b>P value</b> |
|---------------------------------------------------------|---------------------------------------|------------|----------------|
|                                                         | <b>No</b>                             | <b>Yes</b> |                |
| <b>Age in years</b>                                     |                                       |            |                |
| Children (< 18 years)                                   | 73 (34.6)                             | 138 (65.4) | < 0.01         |
| Adults (18-59 years)                                    | 223 (54.8)                            | 184 (45.2) |                |
| Elderly (≥ 60 years)                                    | 117 (77.0)                            | 35 (23.0)  |                |
| <b>Sex</b>                                              |                                       |            |                |
| Male                                                    | 165 (52.2)                            | 151 (47.8) | 0.51           |
| Female                                                  | 248 (54.6)                            | 206 (45.4) |                |
| <b>Level of health facility</b>                         |                                       |            |                |
| Dispensary                                              | 23 (23.0)                             | 77 (77.0)  | < 0.01         |
| Health Centre/Stand-alone clinic by ADO                 | 39 (36.4)                             | 68 (63.6)  |                |
| District Hospital/Clinic L1 by MO/DO                    | 26 (28.0)                             | 67 (72.0)  |                |
| Regional Hospital/Clinic L2 by specialist               | 70 (68.0)                             | 33 (32.0)  |                |
| Referral/National/Zonal Hospital/Clinic L3 by SS        | 255 (69.5)                            | 112 (30.5) |                |
| <b>Ownership of health facility</b>                     |                                       |            |                |
| Public                                                  | 195 (62.7)                            | 116 (37.3) | < 0.01         |
| Private/Non-governmental                                | 218 (47.5)                            | 241 (52.5) |                |
| <b>Department visited</b>                               |                                       |            |                |
| Outpatient                                              | 408 (54.2)                            | 345 (45.8) | 0.04           |
| Inpatient                                               | 5 (29.4)                              | 12 (70.6)  |                |
| <b>Select Diagnosis</b>                                 |                                       |            |                |
| <b>Other disorders of urinary system</b>                |                                       |            |                |
| No                                                      | 407 (60.3)                            | 268 (39.7) | < 0.01         |
| Yes                                                     | 6 (6.3)                               | 89 (93.7)  |                |
| <b>Acute and URTI of multiple and unspecified sites</b> |                                       |            |                |
| No                                                      | 400 (56.7)                            | 306 (43.3) | < 0.01         |
| Yes                                                     | 13 (20.3)                             | 51 (79.7)  |                |
| <b>Other sepsis</b>                                     |                                       |            |                |
| No                                                      | 409 (54.8)                            | 338 (45.2) | < 0.01*        |
| Yes                                                     | 4 (17.4)                              | 19 (82.6)  |                |
| <b>Acute tonsillitis</b>                                |                                       |            |                |
| No                                                      | 412 (55.2)                            | 334 (44.8) | < 0.01*        |
| Yes                                                     | 1 (4.2)                               | 23 (95.8)  |                |

p-values are from Pearson Chi-Square Test or Fisher's Exact Test (\*); SS, Super Specialist

| <b>Supplement 2: Study characteristics by receipt of antibiotic prescription (Continued)</b> |                                       |            |                |
|----------------------------------------------------------------------------------------------|---------------------------------------|------------|----------------|
| <b>Characteristic (N = 770)</b>                                                              | <b>Antibiotic prescription, n (%)</b> |            | <b>P value</b> |
|                                                                                              | <b>No</b>                             | <b>Yes</b> |                |
| <b>Diseases of pulp and periapical tissues</b>                                               |                                       |            |                |
| No                                                                                           | 413 (54.3)                            | 347 (45.7) | < 0.01*        |
| Yes                                                                                          | 0 (0.0)                               | 10 (100.0) |                |
| <b>Candidiasis</b>                                                                           |                                       |            |                |
| No                                                                                           | 411 (54.4)                            | 345 (45.6) | 0.01           |
| Yes                                                                                          | 2 (14.3)                              | 12 (85.7)  |                |
| <b>Bacterial infection of unspecified site</b>                                               |                                       |            |                |
| No                                                                                           | 411 (54.2)                            | 348 (45.8) | 0.03*          |
| Yes                                                                                          | 2 (18.2)                              | 9 (81.8)   |                |
| <b>Pneumonia, unspecified organism</b>                                                       |                                       |            |                |
| No                                                                                           | 411 (54.1)                            | 349 (45.9) | 0.05*          |
| Yes                                                                                          | 2 (20.0)                              | 8 (80.0)   |                |
| <b>Cystitis</b>                                                                              |                                       |            |                |
| No                                                                                           | 413 (54.3)                            | 348 (45.7) | < 0.01*        |
| Yes                                                                                          | 0 (0.0)                               | 9 (100.0)  |                |
| <b>Other female pelvic inflammatory diseases</b>                                             |                                       |            |                |
| No                                                                                           | 412 (54.0)                            | 351 (46.0) | 0.05*          |
| Yes                                                                                          | 1 (14.3)                              | 6 (85.7)   |                |
| <b>Other disorders of bladder</b>                                                            |                                       |            |                |
| No                                                                                           | 413 (54.1)                            | 350 (45.9) | < 0.01*        |
| Yes                                                                                          | 0 (0.0)                               | 7 (100.0)  |                |
| <b>Amoebiasis</b>                                                                            |                                       |            |                |
| No                                                                                           | 413 (54.1)                            | 350 (45.9) | < 0.01*        |
| Yes                                                                                          | 0 (0.0)                               | 7 (100.0)  |                |
| <b>Cellulitis</b>                                                                            |                                       |            |                |
| No                                                                                           | 413 (53.9)                            | 353 (46.1) | 0.05*          |
| Yes                                                                                          | 0 (0.0)                               | 4 (100.0)  |                |
| <b>Infections of genitourinary tract in pregnancy</b>                                        |                                       |            |                |
| No                                                                                           | 413 (53.9)                            | 353 (46.1) | 0.05*          |
| Yes                                                                                          | 0 (0.0)                               | 4 (100.0)  |                |
| <b>Chronic rhinitis, nasopharyngitis and pharyngitis</b>                                     |                                       |            |                |
| No                                                                                           | 413 (53.9)                            | 353 (46.1) | 0.05*          |
| Yes                                                                                          | 0 (0.0)                               | 4 (100.0)  |                |

p-values are from Pearson Chi-Square Test or Fisher's Exact Test (\*)



| <b>Supplement 2: Study characteristics by receipt of antibiotic prescription (Continued)</b> |                                       |            |                |
|----------------------------------------------------------------------------------------------|---------------------------------------|------------|----------------|
| <b>Characteristic (N = 770)</b>                                                              | <b>Antibiotic prescription, n (%)</b> |            | <b>P value</b> |
|                                                                                              | <b>No</b>                             | <b>Yes</b> |                |
| <b>Cutaneous abscess, furuncle and carbuncle</b>                                             |                                       |            |                |
| No                                                                                           | 413 (53.9)                            | 353 (46.1) | 0.05*          |
| Yes                                                                                          | 0 (0.0)                               | 4 (100.0)  |                |
| <b>Other gastroenteritis and colitis of infectious and unspecified origin</b>                |                                       |            |                |
| No                                                                                           | 412 (54.0)                            | 351 (46.0) | 0.05*          |
| Yes                                                                                          | 1 (14.3)                              | 6 (85.7)   |                |
| <b>Acute nasopharyngitis (common cold)</b>                                                   |                                       |            |                |
| No                                                                                           | 404 (54.1)                            | 343 (45.9) | 0.16           |
| Yes                                                                                          | 9 (39.1)                              | 14 (60.9)  |                |
| <b>Conjunctivitis</b>                                                                        |                                       |            |                |
| No                                                                                           | 408 (54.0)                            | 347 (46.0) | 0.11           |
| Yes                                                                                          | 5 (33.3)                              | 10 (66.7)  |                |
| <b>Cough</b>                                                                                 |                                       |            |                |
| No                                                                                           | 408 (54.1)                            | 346 (45.9) | 0.07           |
| Yes                                                                                          | 5 (31.3)                              | 11 (68.8)  |                |
| <b>Gingivitis and periodontal diseases</b>                                                   |                                       |            |                |
| No                                                                                           | 412 (53.9)                            | 353 (46.1) | 0.19*          |
| Yes                                                                                          | 1 (20.0)                              | 4 (80.0)   |                |
| <b>Acute pharyngitis</b>                                                                     |                                       |            |                |
| No                                                                                           | 412 (53.9)                            | 352 (46.1) | 0.10*          |
| Yes                                                                                          | 1 (16.7)                              | 5 (83.3)   |                |
| <b>Bacterial pneumonia, not elsewhere classified</b>                                         |                                       |            |                |
| No                                                                                           | 412 (53.9)                            | 352 (46.1) | 0.10*          |
| Yes                                                                                          | 1 (16.7)                              | 5 (83.3)   |                |
| <b>Unspecified acute lower respiratory infection</b>                                         |                                       |            |                |
| No                                                                                           | 412 (53.9)                            | 353 (46.1) | 0.19*          |
| Yes                                                                                          | 1 (20.0)                              | 4 (80.0)   |                |
| <b>Other diseases of upper respiratory tract</b>                                             |                                       |            |                |
| No                                                                                           | 412 (53.9)                            | 352 (46.1) | 0.10*          |
| Yes                                                                                          | 1 (16.7)                              | 5 (83.3)   |                |

p-values are from Pearson Chi-Square Test or Fisher's Exact Test (\*)

**Supplement 2: Study characteristics by receipt of antibiotic prescription (Continued)**

| Characteristic (N = 770)                                      | Antibiotic prescription, n (%) |            | P value     |
|---------------------------------------------------------------|--------------------------------|------------|-------------|
|                                                               | No                             | Yes        |             |
| <b>Otitis externa</b>                                         |                                |            |             |
| No                                                            | 413 (53.8)                     | 354 (46.2) | 0.10*       |
| Yes                                                           | 0 (0.0)                        | 3 (100.0)  |             |
| <b>Single delivery by caesarean section</b>                   |                                |            |             |
| No                                                            | 413 (53.8)                     | 354 (46.2) | 0.10*       |
| Yes                                                           | 0 (0.0)                        | 3 (100.0)  |             |
| <b>Abdominal and pelvic pain</b>                              |                                |            |             |
| No                                                            | 413 (53.8)                     | 355 (46.2) | 0.22*       |
| Yes                                                           | 0 (0.0)                        | 2 (100.0)  |             |
| <b>Impetigo</b>                                               |                                |            |             |
| No                                                            | 413 (53.8)                     | 354 (46.2) | 0.10*       |
| Yes                                                           | 0 (0.0)                        | 3 (100.0)  |             |
| <b>Osteomyelitis</b>                                          |                                |            |             |
| No                                                            | 413 (53.8)                     | 355 (46.2) | 0.22*       |
| Yes                                                           | 0 (0.0)                        | 2 (100.0)  |             |
| <b>Non-suppurative otitis media</b>                           |                                |            |             |
| No                                                            | 413 (53.8)                     | 355 (46.2) | 0.22*       |
| Yes                                                           | 0 (0.0)                        | 2 (100.0)  |             |
| <b>Suppurative and unspecified otitis media</b>               |                                |            |             |
| No                                                            | 413 (53.8)                     | 355 (46.2) | 0.22*       |
| Yes                                                           | 0 (0.0)                        | 2 (100.0)  |             |
| <b>Acute sinusitis</b>                                        |                                |            |             |
| No                                                            | 413 (53.8)                     | 355 (46.2) | 0.22*       |
| Yes                                                           | 0 (0.0)                        | 2 (100.0)  |             |
| <b>Respiratory disorders in diseases classified elsewhere</b> |                                |            |             |
| No                                                            | 413 (53.8)                     | 355 (46.2) | 0.22*       |
| Yes                                                           | 0 (0.0)                        | 2 (100.0)  |             |
| <b>Dislocation of wrist</b>                                   |                                |            |             |
| No                                                            | 413 (53.8)                     | 355 (46.2) | 0.22*       |
| Yes                                                           | 0 (0.0)                        | 2 (100.0)  |             |
| <b>Any Procedure/Surgery done</b>                             |                                |            |             |
| No                                                            | 403 (54.4)                     | 338 (45.6) | <b>0.04</b> |
| Yes                                                           | 10 (34.5)                      | 19 (65.5)  |             |

p-values are from Pearson Chi-Square Test or Fisher's Exact Test (\*)

**Supplement 2: Study characteristics by receipt of antibiotic prescription (Continued)**

| Characteristic                                                                | Antibiotic prescription, n (%) |            | P value |
|-------------------------------------------------------------------------------|--------------------------------|------------|---------|
|                                                                               | No                             | Yes        |         |
| <b>Type of Procedure/Surgery (N = 29)</b>                                     |                                |            |         |
| Minor                                                                         | 4 (40.0)                       | 6 (60.0)   | 0.71*   |
| Major                                                                         | 0 (0.0)                        | 7 (100.0)  |         |
| Specialized                                                                   | 6 (50.0)                       | 6 (50.0)   |         |
| <b>Prescriber Qualification (N = 770)</b>                                     |                                |            |         |
| Clinical Officer/ Dental Therapist                                            | 27 (21.3)                      | 100 (78.7) | < 0.01* |
| Assistant Medical Officer/Assistant Dental Officer                            | 3 (20.0)                       | 12 (80.0)  |         |
| Medical Officer/Dental Officer                                                | 136 (48.6)                     | 144 (51.4) |         |
| Specialist                                                                    | 200 (69.7)                     | 87 (30.3)  |         |
| Super-specialist/Consultant                                                   | 47 (77.0)                      | 14 (23.0)  |         |
| <b>Prescriber Qualification Grouped (N = 770)</b>                             |                                |            |         |
| Low level (Clinical Officer/DT/AMO/ADO)                                       | 30 (21.1)                      | 112 (78.9) | < 0.01  |
| Mid-level (Medical/Dental Officer)                                            | 136 (48.9)                     | 144 (51.4) |         |
| High level (Specialists/Consultants)                                          | 247 (71.0)                     | 101 (29.0) |         |
| <b>Polypharmacy of ≥ 5 Medications (N = 770)</b>                              |                                |            |         |
| No                                                                            | 346 (52.6)                     | 312 (47.4) | 0.16    |
| Yes                                                                           | 67 (59.8)                      | 45 (40.2)  |         |
| <b>Availability of all medications prescribed in 2017 TZ NEMLIT (N = 770)</b> |                                |            |         |
| No                                                                            | 220 (72.6)                     | 83 (27.4)  | < 0.01  |
| Yes                                                                           | 193 (41.3)                     | 274 (58.7) |         |
| <b>All medications prescribed using their generic names (N = 770)</b>         |                                |            |         |
| No                                                                            | 171 (48.9)                     | 179 (51.1) | 0.02    |
| Yes                                                                           | 242 (57.6)                     | 178 (42.4) |         |
| <b>Was malaria treatment prescribed (N = 770)</b>                             |                                |            |         |
| No                                                                            | 407 (54.2)                     | 344 (45.8) | 0.05    |
| Yes                                                                           | 6 (31.6)                       | 13 (68.4)  |         |
| <b>Presence of injectable formulation in the prescription (N = 770)</b>       |                                |            |         |
| No                                                                            | 388 (55.0)                     | 317 (45.0) | 0.01    |
| Yes                                                                           | 25 (38.5)                      | 40 (61.5)  |         |

p-values are from Pearson Chi-Square Test or Fisher's Exact Test (\*); DT, Dental Therapist; AMO, Assistant Medical Officer; ADO, Assistant Dental Officer

### Supplement 3: Poisson Regression analysis of factors influencing receipt of an antibiotic prescription

| Variable (N = 770)                                            | Univariate Regression |         | Multivariate Regression |         |
|---------------------------------------------------------------|-----------------------|---------|-------------------------|---------|
|                                                               | cPR* (95% CI)         | P value | aPR** (95% CI)          | P value |
| <b>Age in years</b>                                           |                       |         |                         |         |
| Children (< 18 years)                                         | 2.8 (2.1-3.9)         | < 0.001 | 1.7 (1.3-2.2)           | < 0.001 |
| Adults (18-59 years)                                          | 2.0 (1.4-2.7)         | < 0.001 | 1.5 (1.1-1.9)           | 0.004   |
| Elderly (≥ 60 years)                                          | 1 [Ref.]              |         | 1 [Ref.]                |         |
| <b>Sex</b>                                                    |                       |         |                         |         |
| Male                                                          | 1.1 (0.9-1.2)         | 0.51    | Excluded                | NA      |
| Female                                                        | 1 [Ref.]              |         |                         |         |
| <b>Level of health facility</b>                               |                       |         |                         |         |
| Dispensary                                                    | 2.5 (2.1-3.0)         | < 0.001 | 1.3 (0.9-1.8)           | 0.14    |
| Health Centre                                                 | 2.1 (1.7-2.6)         | < 0.001 | 1.5 (1.1-2.0)           | 0.009   |
| District Hospital                                             | 2.4 (1.9-2.9)         | < 0.001 | 1.5 (1.1-1.9)           | 0.004   |
| Regional Referral Hospital                                    | 1.1 (0.8-1.4)         | 0.77    | 1.0 (0.7-1.4)           | 0.97    |
| National Referral Hospital                                    | 1 [Ref.]              |         | 1 [Ref.]                |         |
| <b>Ownership of health facility</b>                           |                       |         |                         |         |
| Public                                                        | 0.7 (0.6-0.8)         | < 0.001 | 1.2 (1.0-1.4)           | 0.03    |
| Private                                                       | 1 [Ref.]              |         | 1 [Ref.]                |         |
| <b>Department visited</b>                                     |                       |         |                         |         |
| Inpatient                                                     | 1.5 (1.1-2.1)         | 0.007   | 2.0 (1.2-3.4)           | 0.01    |
| Outpatient                                                    | 1 [Ref.]              |         | 1 [Ref.]                |         |
| <b>Any Procedure/Surgery done</b>                             |                       |         |                         |         |
| Yes                                                           | 1.4 (1.1-1.9)         | 0.01    | 1.3 (0.8-2.0)           | 0.34    |
| No                                                            | 1 [Ref.]              |         | 1 [Ref.]                |         |
| <b>Prescriber Qualification</b>                               |                       |         |                         |         |
| Clinical Officer/Dental Therapist                             | 3.4 (2.1-5.5)         | < 0.001 | 1.9 (1.2-3.0)           | 0.005   |
| Assistant Medical/Dental Officer                              | 3.5 (2.1-5.9)         | < 0.001 | 2.0 (1.1-3.4)           | 0.02    |
| Medical/Dental Officer                                        | 2.2 (1.4-3.6)         | 0.001   | 1.6 (1.1-2.5)           | 0.03    |
| Specialist                                                    | 1.3 (0.8-2.1)         | 0.27    | 1.3 (0.8-1.9)           | 0.25    |
| Consultant                                                    | 1 [Ref.]              |         | 1 [Ref.]                |         |
| <b>All medications prescribed using their generic names</b>   |                       |         |                         |         |
| No                                                            | 1.2 (1.0-1.4)         | 0.02    | 1.3 (1.1-1.5)           | 0.002   |
| Yes                                                           | 1 [Ref.]              |         | 1 [Ref.]                |         |
| <b>Was malaria treatment prescribed</b>                       |                       |         |                         |         |
| No                                                            | 0.7 (0.5-0.9)         | 0.01    | 1.0 (0.8-1.4)           | 0.77    |
| Yes                                                           | 1 [Ref.]              |         | 1 [Ref.]                |         |
| <b>Presence of injectable formulation in the prescription</b> |                       |         |                         |         |
| Yes                                                           | 1.4 (1.1-1.7)         | 0.003   | 1.4 (1.1-1.8)           | 0.004   |
| No                                                            | 1 [Ref.]              |         | 1 [Ref.]                |         |

\*cPR, Crude Prevalence Ratio; \*\*aPR, Adjusted Prevalence Ratio; CI, Confidence Interval.

**Supplement 3: Poisson Regression analysis of factors influencing receipt of antibiotic prescription (Continued)**

| Variable (N = 770)                                                                  | Univariate Regression |         | Multivariate Regression |         |
|-------------------------------------------------------------------------------------|-----------------------|---------|-------------------------|---------|
|                                                                                     | cPR* (95% CI)         | P value | aPR** (95% CI)          | P value |
| <b>Select Diagnostic Codes</b>                                                      |                       |         |                         |         |
| <b>Other disorders of urinary system - N39</b>                                      |                       |         |                         |         |
| Yes                                                                                 | 2.4 (2.1-2.6)         | < 0.001 | 2.4 (2.1-2.8)           | < 0.001 |
| No                                                                                  | 1 [Ref.]              |         | 1 [Ref.]                |         |
| <b>Acute and URTI of multiple and unspecified sites - J06</b>                       |                       |         |                         |         |
| Yes                                                                                 | 1.8 (1.6-2.1)         | < 0.001 | 1.6 (1.3 – 1.9)         | < 0.001 |
| No                                                                                  | 1 [Ref.]              |         | 1 [Ref.]                |         |
| <b>Other sepsis - A41</b>                                                           |                       |         |                         |         |
| Yes                                                                                 | 1.8 (1.5-2.2)         | < 0.001 | 1.7 (1.2-2.2)           | 0.001   |
| No                                                                                  | 1 [Ref.]              |         | 1 [Ref.]                |         |
| <b>Acute tonsillitis - J03</b>                                                      |                       |         |                         |         |
| Yes                                                                                 | 2.1 (1.9 – 2.4)       | < 0.001 | 2.3 (1.8 – 3.0)         | < 0.001 |
| No                                                                                  | 1 [Ref.]              |         | 1 [Ref.]                |         |
| <b>Candidiasis - B37</b>                                                            |                       |         |                         |         |
| Yes                                                                                 | 1.9 (1.5 – 2.4)       | < 0.001 | 1.6 (1.2 – 2.1)         | 0.002   |
| No                                                                                  | 1 [Ref.]              |         | 1 [Ref.]                |         |
| <b>Bacterial infection of unspecified site - A49</b>                                |                       |         |                         |         |
| Yes                                                                                 | 1.8 (1.3 – 2.4)       | < 0.001 | 2.1 (1.5 – 2.8)         | < 0.001 |
| No                                                                                  | 1 [Ref.]              |         | 1 [Ref.]                |         |
| <b>Pneumonia, unspecified organism - J18</b>                                        |                       |         |                         |         |
| Yes                                                                                 | 1.7 (1.3 – 2.4)       | 0.001   | 1.5 (0.8 – 2.9)         | 0.18    |
| No                                                                                  | 1 [Ref.]              |         | 1 [Ref.]                |         |
| <b>Other female pelvic inflammatory diseases - N73</b>                              |                       |         |                         |         |
| Yes                                                                                 | 1.9 (1.4 – 2.5)       | < 0.001 | 1.7 (1.2 – 2.5)         | 0.004   |
| No                                                                                  | 1 [Ref.]              |         | 1 [Ref.]                |         |
| <b>Other gastroenteritis and colitis of infectious and unspecified origin - A09</b> |                       |         |                         |         |
| Yes                                                                                 | 1.9 (1.4 – 2.5)       | < 0.001 | 1.4 (0.9 – 2.0)         | 0.14    |
| No                                                                                  | 1 [Ref.]              |         | 1 [Ref.]                |         |
| <b>Gingivitis and periodontal disease - K05</b>                                     |                       |         |                         |         |
| Yes                                                                                 | 1.7 (1.1 – 2.7)       | 0.02    | 1.9 (1.2 – 2.9)         | 0.004   |
| No                                                                                  | 1 [Ref.]              |         | 1 [Ref.]                |         |
| <b>Cough - R05</b>                                                                  |                       |         |                         |         |
| Yes                                                                                 | 1.5 (1.1 – 2.1)       | 0.02    | 1.0 (0.7 – 1.4)         | 0.90    |
| No                                                                                  | 1 [Ref.]              |         | 1 [Ref.]                |         |

\*cPR, Crude Prevalence Ratio; \*\*aOR, Adjusted Prevalence Ratio; CI, Confidence Interval

**Supplement 3: Poisson Regression analysis of factors influencing receipt of antibiotic prescription (Continued)**

| Variable (N = 770)                                             | Univariate Regression |         | Multivariate Regression |         |
|----------------------------------------------------------------|-----------------------|---------|-------------------------|---------|
|                                                                | cPR* (95% CI)         | P value | aPR** (95% CI)          | P value |
| <b>Conjunctivitis - H10</b>                                    |                       |         |                         |         |
| Yes                                                            | 1.5 (1.0 – 2.1)       | 0.05    | 1.6 (1.0 – 2.7)         | 0.05    |
| No                                                             | 1 [Ref.]              |         | 1 [Ref.]                |         |
| <b>Amoebiasis - A06</b>                                        |                       |         |                         |         |
| Yes                                                            | 2.2 (2.0 – 2.4)       | < 0.001 | 2.1 (1.5 – 2.9)         | < 0.001 |
| No                                                             | 1 [Ref.]              |         | 1 [Ref.]                |         |
| <b>Otitis Externa – H60</b>                                    |                       |         |                         |         |
| Ref                                                            | 2.2 (2.0 – 2.4)       | < 0.001 | 0.8 (0.2 – 2.7)         | 0.70    |
| No                                                             | 1 [Ref.]              |         | 1 [Ref.]                |         |
| <b>Acute nasopharyngitis (common cold) - J00</b>               |                       |         |                         |         |
| Yes                                                            | 1.3 (0.9 – 1.9)       | 0.10    | 0.7 (0.5 – 1.1)         | 0.10    |
| No                                                             | 1 [Ref.]              |         | 1 [Ref.]                |         |
| <b>Acute pharyngitis – J02</b>                                 |                       |         |                         |         |
| Yes                                                            | 1.8 (1.3 – 2.6)       | 0.002   | 2.7 (1.1 – 6.3)         | 0.03    |
| No                                                             | 1 [Ref.]              |         | 1 [Ref.]                |         |
| <b>Bacterial pneumonia not elsewhere classified - J15</b>      |                       |         |                         |         |
| Yes                                                            | 1.8 (1.3 – 2.6)       | 0.002   | 1.2 (0.8 – 1.6)         | 0.30    |
| No                                                             | 1 [Ref.]              |         | 1 [Ref.]                |         |
| <b>Unspecified acute lower respiratory infection - J22</b>     |                       |         |                         |         |
| Yes                                                            | 1.7 (1.1 – 2.7)       | 0.02    | 1.5 (1.0 – 2.2)         | 0.05    |
| No                                                             | 1 [Ref.]              |         | 1 [Ref.]                |         |
| <b>Chronic rhinitis, nasopharyngitis and pharyngitis - J31</b> |                       |         |                         |         |
| Yes                                                            | 2.2 (2.0 – 2.3)       | < 0.001 | 4.0 (2.4 – 6.4)         | < 0.001 |
| No                                                             | 1 [Ref.]              |         | 1 [Ref.]                |         |
| <b>Other diseases of upper respiratory tract - J39</b>         |                       |         |                         |         |
| Yes                                                            | 1.8 (1.3 – 2.6)       | 0.002   | 1.1 (0.7 – 1.7)         | 0.80    |
| No                                                             | 1 [Ref.]              |         | 1 [Ref.]                |         |
| <b>Disease of the pulp and periapical tissues - K04</b>        |                       |         |                         |         |
| Yes                                                            | 2.2 (2.0 – 2.4)       | < 0.001 | 3.4 (2.3 – 4.8)         | < 0.001 |
| No                                                             | 1 [Ref.]              |         | 1 [Ref.]                |         |
| <b>Impetigo - L01</b>                                          |                       |         |                         |         |
| Yes                                                            | 2.2 (2.0 – 2.3)       | < 0.001 | 2.4 (1.2 – 4.7)         | 0.01    |
| No                                                             | 1 [Ref.]              |         | 1 [Ref.]                |         |

\*cPR, Crude Prevalence Ratio; \*\*aPR, Adjusted Prevalence Ratio; CI, Confidence Interval

**Supplement 3: Poisson Regression analysis of factors influencing receipt of an antibiotic prescription (Continued)**

| Variable (N = 770)                                          | Univariate Regression |         | Multivariate Regression |         |
|-------------------------------------------------------------|-----------------------|---------|-------------------------|---------|
|                                                             | cPR* (95% CI)         | P value | aPR** (95% CI)          | P value |
| <b>Cutaneous abscess, furuncle and carbuncle - L02</b>      |                       |         |                         |         |
| Yes                                                         | 2.2 (2.0 – 2.3)       | < 0.001 | 3.0 (1.9 – 4.9)         | < 0.001 |
| No                                                          | 1 [Ref.]              |         | 1 [Ref.]                |         |
| <b>Cellulitis - L03</b>                                     |                       |         |                         |         |
| Yes                                                         | 2.2 (2.0 – 2.3)       | < 0.001 | 2.4 (1.8 – 3.2)         | < 0.001 |
| No                                                          | 1 [Ref.]              |         | 1 [Ref.]                |         |
| <b>Cystitis - N30</b>                                       |                       |         |                         |         |
| Yes                                                         | 2.2 (2.0 – 2.4)       | < 0.001 | 2.7 (2.1 – 3.5)         | < 0.001 |
| No                                                          | 1 [Ref.]              |         | 1 [Ref.]                |         |
| <b>Other disorders of bladder - N32</b>                     |                       |         |                         |         |
| Yes                                                         | 2.2 (2.0 – 2.3)       | < 0.001 | 3.5 (2.5 – 4.8)         | < 0.001 |
| No                                                          | 1 [Ref.]              |         | 1 [Ref.]                |         |
| <b>Infections of genitourinary tract in pregnancy - O23</b> |                       |         |                         |         |
| Yes                                                         | 2.2 (2.0 – 2.3)       | < 0.001 | 2.9 (2.1 – 4.0)         | < 0.001 |
| No                                                          | 1 [Ref.]              |         | 1 [Ref.]                |         |
| <b>Single delivery by caesarean section - O82</b>           |                       |         |                         |         |
| Yes                                                         | 2.2 (2.0 – 2.3)       | < 0.001 | 1.7 (0.8 – 3.5)         | 0.18    |
| No                                                          | 1 [Ref.]              |         | 1 [Ref.]                |         |

\*cPR, Crude Prevalence Ratio; \*\*aPR, Adjusted Prevalence Ratio; CI, Confidence Interval

**STROBE 2007 (v4) Statement—Checklist of items that should be included in reports of *cross-sectional studies***

| Section/Topic                | Item # | Recommendation                                                                                                                                                                       | Reported on page # |
|------------------------------|--------|--------------------------------------------------------------------------------------------------------------------------------------------------------------------------------------|--------------------|
| <b>Title and abstract</b>    | 1      | (a) Indicate the study's design with a commonly used term in the title or the abstract                                                                                               | 1                  |
|                              |        | (b) Provide in the abstract an informative and balanced summary of what was done and what was found                                                                                  | 2                  |
| <b>Introduction</b>          |        |                                                                                                                                                                                      |                    |
| Background/rationale         | 2      | Explain the scientific background and rationale for the investigation being reported                                                                                                 | 3                  |
| Objectives                   | 3      | State specific objectives, including any prespecified hypotheses                                                                                                                     | 4                  |
| <b>Methods</b>               |        |                                                                                                                                                                                      |                    |
| Study design                 | 4      | Present key elements of study design early in the paper                                                                                                                              | 4                  |
| Setting                      | 5      | Describe the setting, locations, and relevant dates, including periods of recruitment, exposure, follow-up, and data collection                                                      | 4, 5               |
| Participants                 | 6      | (a) Give the eligibility criteria, and the sources and methods of selection of participants                                                                                          | 5                  |
| Variables                    | 7      | Clearly define all outcomes, exposures, predictors, potential confounders, and effect modifiers. Give diagnostic criteria, if applicable                                             | 5                  |
| Data sources/<br>measurement | 8*     | For each variable of interest, give sources of data and details of methods of assessment (measurement). Describe comparability of assessment methods if there is more than one group | 5                  |
| Bias                         | 9      | Describe any efforts to address potential sources of bias                                                                                                                            | 5                  |
| Study size                   | 10     | Explain how the study size was arrived at                                                                                                                                            |                    |
| Quantitative variables       | 11     | Explain how quantitative variables were handled in the analyses. If applicable, describe which groupings were chosen and why                                                         | 5                  |
| Statistical methods          | 12     | (a) Describe all statistical methods, including those used to control for confounding                                                                                                | 5                  |
|                              |        | (b) Describe any methods used to examine subgroups and interactions                                                                                                                  | NA                 |
|                              |        | (c) Explain how missing data were addressed                                                                                                                                          | 5                  |
|                              |        | (d) If applicable, describe analytical methods taking account of sampling strategy                                                                                                   | NA                 |
|                              |        | (e) Describe any sensitivity analyses                                                                                                                                                | NA                 |
| <b>Results</b>               |        |                                                                                                                                                                                      |                    |



|                          |     |                                                                                                                                                                                                                                                                                                                                                                                                               |                      |
|--------------------------|-----|---------------------------------------------------------------------------------------------------------------------------------------------------------------------------------------------------------------------------------------------------------------------------------------------------------------------------------------------------------------------------------------------------------------|----------------------|
| Participants             | 13* | (a) Report numbers of individuals at each stage of study—eg numbers potentially eligible, examined for eligibility, confirmed eligible, included in the study, completing follow-up, and analysed<br>(b) Give reasons for non-participation at each stage<br>(c) Consider use of a flow diagram                                                                                                               | 6                    |
| Descriptive data         | 14* | (a) Give characteristics of study participants (eg demographic, clinical, social) and information on exposures and potential confounders<br>(b) Indicate number of participants with missing data for each variable of interest                                                                                                                                                                               | 6<br>NA              |
| Outcome data             | 15* | Report numbers of outcome events or summary measures                                                                                                                                                                                                                                                                                                                                                          | 6                    |
| Main results             | 16  | (a) Give unadjusted estimates and, if applicable, confounder-adjusted estimates and their precision (eg, 95% confidence interval). Make clear which confounders were adjusted for and why they were included<br>(b) Report category boundaries when continuous variables were categorized<br>(c) If relevant, consider translating estimates of relative risk into absolute risk for a meaningful time period | 9, 10, 11<br>7<br>NA |
| Other analyses           | 17  | Report other analyses done—eg analyses of subgroups and interactions, and sensitivity analyses                                                                                                                                                                                                                                                                                                                | NA                   |
| <b>Discussion</b>        |     |                                                                                                                                                                                                                                                                                                                                                                                                               |                      |
| Key results              | 18  | Summarise key results with reference to study objectives                                                                                                                                                                                                                                                                                                                                                      | 12                   |
| Limitations              | 19  | Discuss limitations of the study, taking into account sources of potential bias or imprecision. Discuss both direction and magnitude of any potential bias                                                                                                                                                                                                                                                    | 15                   |
| Interpretation           | 20  | Give a cautious overall interpretation of results considering objectives, limitations, multiplicity of analyses, results from similar studies, and other relevant evidence                                                                                                                                                                                                                                    | 12,13,14,15          |
| Generalisability         | 21  | Discuss the generalisability (external validity) of the study results                                                                                                                                                                                                                                                                                                                                         | 15                   |
| <b>Other information</b> |     |                                                                                                                                                                                                                                                                                                                                                                                                               |                      |
| Funding                  | 22  | Give the source of funding and the role of the funders for the present study and, if applicable, for the original study on which the present article is based                                                                                                                                                                                                                                                 | 2                    |

\*Give information separately for cases and controls in case-control studies and, if applicable, for exposed and unexposed groups in cohort and cross-sectional studies.

**Note:** An Explanation and Elaboration article discusses each checklist item and gives methodological background and published examples of transparent reporting. The STROBE checklist is best used in conjunction with this article (freely available on the Web sites of PLoS Medicine at <http://www.plosmedicine.org/>, Annals of Internal Medicine at <http://www.annals.org/>, and Epidemiology at <http://www.epidem.com/>). Information on the STROBE Initiative is available at [www.strobe-statement.org](http://www.strobe-statement.org).
