# Supplementary material for: Factors influencing receipt of an antibiotic prescription among insured patients in Tanzania: a cross-sectional study
Source: PubMed Central journal article supplement — BMJ Open. 2022 Nov 4;12(11):e062147. doi: 10.1136/bmjopen-2022-062147 (PMC9639089; doi:10.1136/bmjopen-2022-062147), 2022-11-04
Supplement: bmjopen-2022-062147supp001.pdf [file bmjopen-2022-062147supp001.pdf]

**Supplement 1: Frequency distribution of all study variables**

| <b>Characteristic</b>                                               | <b>n (%)</b> |
|---------------------------------------------------------------------|--------------|
| <b>Age in years (N = 993)</b>                                       |              |
| Mean (SD) = 36.3 (23.2), Median = 37.0                              |              |
| Children (< 18 years)                                               | 264 (26.6)   |
| Adults (18-59 years)                                                | 535 (53.9)   |
| Elderly ( $\geq$ 60 years)                                          | 194 (19.5)   |
| <b>Sex (N = 993)</b>                                                |              |
| Male                                                                | 412 (41.5)   |
| Female                                                              | 581 (58.5)   |
| <b>Level of health facility (N = 993)</b>                           |              |
| Dispensary                                                          | 102 (10.3)   |
| Health Centre/Stand-alone clinic by Assistant Dental Officer        | 119 (12.0)   |
| District Hospital/Clinic Level1 by Medical/Dental Officer           | 101 (10.2)   |
| Regional Hospital/Clinic Level 2 by specialist)                     | 123 (12.4)   |
| Referral/National/Zonal Hospital/Clinic Level 3 by super specialist | 548 (55.2)   |
| <b>Ownership of health facility (N = 993)</b>                       |              |
| Public                                                              | 468 (47.1)   |
| Private/Nongovernmental                                             | 525 (52.9)   |
| <b>Department visited (N = 993)</b>                                 |              |
| Outpatient                                                          | 975 (98.2)   |
| Inpatient                                                           | 18 (1.8)     |
| <b>Diagnosis code (N = 993)</b>                                     |              |
| Other disorders of urinary system                                   | 102 (10.3)   |
| Essential (primary) hypertension                                    | 81 (8.2)     |
| Acute and URTI of multiple and unspecified sites                    | 65 (6.5)     |
| Type 2 diabetes mellitus                                            | 51 (5.1)     |
| Spondylosis                                                         | 42 (4.2)     |
| Hypertensive Heart Disease                                          | 42 (4.2)     |
| Gastritis and duodenitis                                            | 39 (3.9)     |
| Disorders of lipoprotein metabolism and other lipidemias            | 36 (3.6)     |
| Pain, not elsewhere classified                                      | 33 (3.3)     |
| Iron deficiency anaemia                                             | 31 (3.1)     |
| Dermatophytosis                                                     | 31 (3.1)     |
| Vasomotor and allergic rhinitis                                     | 27 (2.7)     |
| Atopic dermatitis                                                   | 27 (2.7)     |
| Other sepsis                                                        | 25 (2.5)     |

Key; RefH, Referral Hospital, L1C, Level 1 Clinic; L2C, Level 2 Clinic

| <b>Supplement 1: Frequency distribution of all study variables (continued)</b> |              |
|--------------------------------------------------------------------------------|--------------|
| <b>Characteristic (N = 993)</b>                                                | <b>n (%)</b> |
| Iron deficiency anaemia                                                        | 31 (3.1)     |
| Dermatophytosis                                                                | 31 (3.1)     |
| Vasomotor and allergic rhinitis                                                | 27 (2.7)     |
| Atopic dermatitis                                                              | 27 (2.7)     |
| Other sepsis                                                                   | 25 (2.5)     |
| Acute nasopharyngitis (common cold)                                            | 24 (2.4)     |
| Acute tonsillitis                                                              | 24 (2.4)     |
| Asthma                                                                         | 23 (2.3)     |
| Malaria, unspecified                                                           | 23 (2.3)     |
| PUD, site unspecified                                                          | 22 (2.2)     |
| Chronic kidney disease                                                         | 18 (1.8)     |
| Complications of analgesics, antipyretics and anti-inflammatory drugs          | 18 (1.8)     |
| Plasmodium falciparum                                                          | 16 (1.6)     |
| Conjunctivitis                                                                 | 16 (1.6)     |
| Diseases of pulp and periapical tissues                                        | 17 (1.7)     |
| Cough                                                                          | 16 (1.6)     |
| Hookworm disease                                                               | 14 (1.4)     |
| Candidiasis                                                                    | 14 (1.4)     |
| Other vitamin deficiency                                                       | 14 (1.4)     |
| Chronic diseases of tonsils and adenoids                                       | 14 (1.4)     |
| Other joint disorders, not elsewhere classified                                | 14 (1.4)     |
| Gonarthrosis (arthrosis of knee)                                               | 13 (1.3)     |
| Supervision of normal pregnancy                                                | 13 (1.3)     |
| Dental caries                                                                  | 13 (1.3)     |
| Bacterial infection of unspecified site                                        | 11 (1.1)     |
| Deficiency of other nutrient elements                                          | 11 (1.1)     |
| Pneumonia, unspecified organism                                                | 11 (1.1)     |
| Other deforming dorsopathies                                                   | 11 (1.1)     |
| Epilepsy                                                                       | 10 (1.0)     |
| Cystitis                                                                       | 10 (1.0)     |
| Chronic viral hepatitis                                                        | 10 (1.0)     |
| Acute bronchitis                                                               | 10 (1.0)     |
| Hyperplasia of prostate                                                        | 10 (1.0)     |
| Deficiency of other B group vitamins                                           | 9 (0.9)      |

| <b>Supplement 1: Frequency distribution of all study variables (Continued)</b> |              |
|--------------------------------------------------------------------------------|--------------|
| <b>Characteristic (N = 993)</b>                                                | <b>n (%)</b> |
| Disorders of refraction and accommodation                                      | 9 (0.9)      |
| Other arthritis                                                                | 8 (0.8)      |
| Headache                                                                       | 9 (0.9)      |
| Ascariasis                                                                     | 8 (0.8)      |
| Other disorders of fluid, electrolyte and acid-base balance                    | 8 (0.8)      |
| Gingivitis and periodontal diseases                                            | 8 (0.8)      |
| Gastro-oesophageal reflux disease                                              | 8 (0.8)      |
| Gout                                                                           | 8 (0.8)      |
| Other female pelvic inflammatory diseases                                      | 8 (0.8)      |
| Other disorders of bladder                                                     | 7 (0.7)      |
| Amoebiasis                                                                     | 7 (0.7)      |
| Other gastroenteritis and colitis of infectious and unspecified origin         | 7 (0.7)      |
| Other anemias                                                                  | 7 (0.7)      |
| Other hypothyroidism                                                           | 7 (0.7)      |
| Cardiomyopathy                                                                 | 7 (0.7)      |
| Other functional intestinal disorders                                          | 7 (0.7)      |
| Allergic contact dermatitis                                                    | 7 (0.7)      |
| Dorsalgia                                                                      | 6 (0.6)      |
| Nerve root and plexus compressions in diseases classified elsewhere            | 6 (0.6)      |
| Malaise and fatigue                                                            | 6 (0.6)      |
| Other helminthiasis                                                            | 6 (0.6)      |
| Other superficial mycoses                                                      | 6 (0.6)      |
| Type 1 diabetes mellitus                                                       | 6 (0.6)      |
| Other polyneuropathies                                                         | 6 (0.6)      |
| Heart failure                                                                  | 6 (0.6)      |
| Acute pharyngitis                                                              | 6 (0.6)      |
| Bacterial pneumonia, not elsewhere classified                                  | 6 (0.6)      |
| Unspecified acute lower respiratory infection                                  | 6 (0.6)      |
| Other diseases of upper respiratory tract                                      | 6 (0.6)      |
| Cellulitis                                                                     | 6 (0.6)      |
| Other disorders of external ear                                                | 6 (0.6)      |
| Unspecified intestinal parasitism                                              | 5 (0.5)      |
| Malignant neoplasm of the breast                                               | 5 (0.5)      |
| Leiomyoma of the uterus                                                        | 5 (0.5)      |
| Inflammatory polyneuropathy                                                    | 5 (0.5)      |

**Supplement 1: Frequency distribution of all study variables (continued)**

| <b>Characteristic (N = 993)</b>                                | <b>n (%)</b> |
|----------------------------------------------------------------|--------------|
| Glaucoma                                                       | 5 (0.5)      |
| Secondary hypertension                                         | 5 (0.5)      |
| Other diseases of hard tissues of teeth                        | 5 (0.5)      |
| Irritable bowel syndrome                                       | 5 (0.5)      |
| Arthrosis of first carpometacarpal joint                       | 5 (0.5)      |
| Other disorders of muscle                                      | 5 (0.5)      |
| Excessive vomiting in pregnancy                                | 5 (0.5)      |
| Nausea and vomiting                                            | 5 (0.5)      |
| Infections of genitourinary tract in pregnancy                 | 4 (0.4)      |
| Varicella (chickenpox)                                         | 4 (0.4)      |
| Malignant neoplasm of the prostate                             | 4 (0.4)      |
| Sickle cell disorders                                          | 4 (0.4)      |
| Coagulation defect, unspecified                                | 4 (0.4)      |
| Cervical disc disorders                                        | 4 (0.4)      |
| Other retinal disorders                                        | 4 (0.4)      |
| Otitis externa                                                 | 4 (0.4)      |
| Disorders of vestibular function                               | 4 (0.4)      |
| Chronic ischemic heart disease                                 | 4 (0.4)      |
| Chronic rhinitis, nasopharyngitis and pharyngitis              | 4 (0.4)      |
| Dental facial anomalies (including malocclusion)               | 4 (0.4)      |
| Cutaneous abscess, furuncle and carbuncle                      | 4 (0.4)      |
| Other soft tissues disorders, not elsewhere classified         | 4 (0.4)      |
| Single delivery by caesarean section                           | 4 (0.4)      |
| Congenital malformation of cardiac septa                       | 4 (0.4)      |
| Abdominal and pelvic pain                                      | 4 (0.4)      |
| Open wound of the forearm                                      | 4 (0.4)      |
| Fever of other and unknown origin                              | 4 (0.4)      |
| Fracture of lower leg, including ankle                         | 4 (0.4)      |
| Dislocation, sprain and strain of joints and ligaments of knee | 4 (0.4)      |
| Other intervertebral disc disorders                            | 3 (0.3)      |
| Coxarthrosis (arthrosis of hip)                                | 3 (0.3)      |
| Polyarthrosis                                                  | 3 (0.3)      |
| Acne                                                           | 3 (0.3)      |
| Urticaria                                                      | 3 (0.3)      |
| Other parasitologically confirmed malaria                      | 3 (0.3)      |

**Supplement 1: Frequency distribution of all study variables (continued)**

| <b>Characteristic (N = 993)</b>                            | <b>n (%)</b> |
|------------------------------------------------------------|--------------|
| Trichomoniasis                                             | 3 (0.3)      |
| Other bacterial Intestinal Infections                      | 3 (0.3)      |
| Herpes Simplex Infection                                   | 3 (0.3)      |
| HIV disease resulting in infectious and parasitic diseases | 3 (0.3)      |
| Malignant neoplasm of colon                                | 3 (0.3)      |
| Malignant neoplasm of cervix uteri                         | 3 (0.3)      |
| Haemangioma and lymphangioma, any site                     | 3 (0.3)      |
| Thyrotoxicosis                                             | 3 (0.3)      |
| Vitamin D deficiency                                       | 3 (0.3)      |
| Disorders of mineral metabolism                            | 3 (0.3)      |
| Hereditary and idiopathic neuropathy                       | 3 (0.3)      |
| Senile cataract                                            | 3 (0.3)      |
| Duodenal ulcer                                             | 3 (0.3)      |
| Impetigo                                                   | 3 (0.3)      |
| Other dermatitis                                           | 3 (0.3)      |
| Internal derangement of knee                               | 3 (0.3)      |
| Osteomyelitis                                              | 3 (0.3)      |
| Acute renal failure                                        | 3 (0.3)      |
| Other general symptoms and signs                           | 3 (0.3)      |
| Other abnormal findings of blood chemistry                 | 3 (0.3)      |
| Presence of prosthetic heart valve                         | 3 (0.3)      |
| Fracture of femur                                          | 2 (0.2)      |
| Other dorsopathies, not elsewhere classified               | 2 (0.2)      |
| Other spondylopathies                                      | 2 (0.2)      |
| Psoriasis                                                  | 2 (0.2)      |
| Seborrheic dermatitis                                      | 2 (0.2)      |
| Diphyllobothriasis and sparganosis                         | 2 (0.2)      |
| Scabies                                                    | 2 (0.2)      |
| Streptococcal sepsis                                       | 2 (0.2)      |
| Miliary tuberculosis                                       | 2 (0.2)      |
| Typhoid and paratyphoid fevers                             | 2 (0.2)      |
| Unspecified HIV disease                                    | 2 (0.2)      |
| Viral infection of unspecified site                        | 2 (0.2)      |
| Myiasis                                                    | 2 (0.2)      |

**Supplement 1: Frequency distribution of all study variables (continued)**

| <b>Characteristic (N = 993)</b>                                                 | <b>n (%)</b> |
|---------------------------------------------------------------------------------|--------------|
| Streptococcus and staphylococcus as the cause of diseases classified elsewhere  | 2 (0.2)      |
| Other specified infectious agents as the cause of diseases classified elsewhere | 2 (0.2)      |
| Malignant neoplasm of esophagus                                                 | 2 (0.2)      |
| Malignant neoplasm of penis                                                     | 2 (0.2)      |
| Malignant neoplasm of thyroid gland                                             | 2 (0.2)      |
| Benign lipomatous neoplasm                                                      | 2 (0.2)      |
| Benign neoplasm of thyroid gland                                                | 2 (0.2)      |
| Vitamin B12 deficiency anemia                                                   | 2 (0.2)      |
| Other nutritional anemias                                                       | 2 (0.2)      |
| Purpura and other haemorrhagic conditions                                       | 2 (0.2)      |
| Other disorders of white blood cells                                            | 2 (0.2)      |
| Other specified diabetes mellitus                                               | 2 (0.2)      |
| Unspecified diabetes mellitus                                                   | 2 (0.2)      |
| Hyperprolactinemia                                                              | 2 (0.2)      |
| Disorders of purine and pyrimidine metabolism                                   | 2 (0.2)      |
| Schizophrenia                                                                   | 2 (0.2)      |
| Migraine                                                                        | 2 (0.2)      |
| Other headache syndromes                                                        | 2 (0.2)      |
| Disorders of autonomic nervous system                                           | 2 (0.2)      |
| Other inflammation of the eyelid                                                | 2 (0.2)      |
| Other disorders of conjunctiva                                                  | 2 (0.2)      |
| Nonsuppurative otitis media                                                     | 2 (0.2)      |
| Suppurative and unspecified otitis media                                        | 2 (0.2)      |
| Other rheumatic heart disease                                                   | 2 (0.2)      |
| Pulmonary embolism                                                              | 2 (0.2)      |
| Acute and subacute infective endocarditis                                       | 2 (0.2)      |
| Cerebral infarction                                                             | 2 (0.2)      |
| Stroke, not specified as hemorrhage or infarction                               | 2 (0.2)      |
| Other venous embolism and thrombosis                                            | 2 (0.2)      |
| Hemorrhoids                                                                     | 2 (0.2)      |
| Hypotension                                                                     | 2 (0.2)      |
| Acute sinusitis                                                                 | 2 (0.2)      |
| Pneumonia due to <i>H. influenza</i>                                            | 2 (0.2)      |
| Acute bronchiolitis                                                             | 2 (0.2)      |

| <b>Supplement 1: Frequency distribution of all study variables (continued)</b>                      |              |
|-----------------------------------------------------------------------------------------------------|--------------|
| <b>Characteristic (N = 993)</b>                                                                     | <b>n (%)</b> |
| Chronic sinusitis                                                                                   | 2 (0.2)      |
| Nasal polyp                                                                                         | 2 (0.2)      |
| Respiratory disorders in diseases classified elsewhere                                              | 2 (0.2)      |
| Gastric ulcer                                                                                       | 2 (0.2)      |
| Inguinal hernia                                                                                     | 2 (0.2)      |
| Umbilical hernia                                                                                    | 2 (0.2)      |
| Other diseases of the liver                                                                         | 2 (0.2)      |
| Pruritus                                                                                            | 2 (0.2)      |
| Nephrotic syndrome                                                                                  | 2 (0.2)      |
| Calculus of kidney and ureter                                                                       | 2 (0.2)      |
| Other disorders of kidney and ureter in diseases classified elsewhere                               | 2 (0.2)      |
| Urethral stricture                                                                                  | 2 (0.2)      |
| Excessive, frequent and irregular menstruation                                                      | 2 (0.2)      |
| Abnormal uterine and vaginal bleeding, unspecified                                                  | 2 (0.2)      |
| Female infertility                                                                                  | 2 (0.2)      |
| Threatened abortion                                                                                 | 2 (0.2)      |
| Perineal laceration during delivery                                                                 | 2 (0.2)      |
| Single spontaneous delivery                                                                         | 2 (0.2)      |
| Anaemia complicating pregnancy, childbirth and the puerperium                                       | 2 (0.2)      |
| Congenital malformation of the great arteries                                                       | 2 (0.2)      |
| Abnormalities of heart beat                                                                         | 2 (0.2)      |
| Other symptoms and signs involving the digestive system and abdomen                                 | 2 (0.2)      |
| Abnormal involuntary movements                                                                      | 2 (0.2)      |
| Dislocation, sprain and strain of joints and ligaments of lumbar spine and pelvis                   | 2 (0.2)      |
| Fracture of shoulder and upper arm                                                                  | 2 (0.2)      |
| Fracture of lower end of radius                                                                     | 2 (0.2)      |
| Dislocation of wrist                                                                                | 2 (0.2)      |
| Open wound of lower leg                                                                             | 2 (0.2)      |
| Poisoning by local antifungal, anti-infective and anti-inflammatory drugs, not elsewhere classified | 2 (0.2)      |
| Allergy, unspecified                                                                                | 2 (0.2)      |
| Supervision of high-risk pregnancy, unspecified                                                     | 2 (0.2)      |
| Health supervision and care of other healthy infant and child                                       | 2 (0.2)      |
| Spastic quadriplegic cerebral palsy                                                                 | 1 (0.1)      |
| Dengue fever (classical dengue)                                                                     | 1 (0.1)      |

**Supplement 1: Frequency distribution of all study variables (continued)**

| <b>Characteristic (N = 993)</b>                                                                                                                                   | <b>n (%)</b> |
|-------------------------------------------------------------------------------------------------------------------------------------------------------------------|--------------|
| Open wound of abdomen, lower back and pelvis                                                                                                                      | 1 (0.1)      |
| Sensorineural hearing loss, bilateral                                                                                                                             | 1 (0.1)      |
| Antenatal screening                                                                                                                                               | 1 (0.1)      |
| Pregnancy confirmed                                                                                                                                               | 1 (0.1)      |
| Contact with and exposure to communicable diseases                                                                                                                | 1 (0.1)      |
| Routine general health check-up of defined subpopulation                                                                                                          | 1 (0.1)      |
| Other medical procedures as the cause of abnormal reaction of the patient, or of later complication, without mention of misadventure at the time of the procedure | 1 (0.1)      |
| Hanging, strangulation and suffocation, undetermined intent                                                                                                       | 1 (0.1)      |
| Intentional self-harm by jumping from a high place                                                                                                                | 1 (0.1)      |
| Exposure to discharge of firework                                                                                                                                 | 1 (0.1)      |
| Poisoning by antihyperlipidaemic and antiarteriosclerotic drugs                                                                                                   | 1 (0.1)      |
| Poisoning by hormones and their synthetic substitutes and antagonists, not elsewhere classified                                                                   | 1 (0.1)      |
| Poisoning by antiviral drug                                                                                                                                       | 1 (0.1)      |
| Poisoning by antifungals and antibiotics, systemically used                                                                                                       | 1 (0.1)      |
| Corrosions classified according to extent of body surface involved                                                                                                | 1 (0.1)      |
| Burns classified according to extent of body surface involved                                                                                                     | 1 (0.1)      |
| Burn of first degree of wrist and hand                                                                                                                            | 1 (0.1)      |
| Injury of unspecified muscle and tendon of lower limb, level unspecified                                                                                          | 1 (0.1)      |
| Fracture of other toe                                                                                                                                             | 1 (0.1)      |
| Open wound of other parts of foot                                                                                                                                 | 1 (0.1)      |
| Superficial injury of hip and thigh, unspecified                                                                                                                  | 1 (0.1)      |
| Other and unspecified injuries of wrist and hand                                                                                                                  | 1 (0.1)      |
| Sprain and strain of wrist                                                                                                                                        | 1 (0.1)      |
| Superficial injury of wrist and hand                                                                                                                              | 1 (0.1)      |
| Injury of muscle(s) and tendon(s) of the rotator cuff                                                                                                             | 1 (0.1)      |
| Superficial injury of shoulder and upper arm                                                                                                                      | 1 (0.1)      |
| Fracture of lumbar spine and pelvis                                                                                                                               | 1 (0.1)      |
| Intracranial injury                                                                                                                                               | 1 (0.1)      |
| Fracture of skull and facial bones                                                                                                                                | 1 (0.1)      |
| Open wound of the head                                                                                                                                            | 1 (0.1)      |
| Intracranial space-occupying lesion                                                                                                                               | 1 (0.1)      |
| Symptoms and signs concerning fluid intake                                                                                                                        | 1 (0.1)      |
| Dizziness and giddiness                                                                                                                                           | 1 (0.1)      |



**Supplement 1: Frequency distribution of all study variables (continued)**

| <b>Characteristic (N = 993)</b>                                                      | <b>n (%)</b> |
|--------------------------------------------------------------------------------------|--------------|
| Unspecified urinary incontinence                                                     | 1 (0.1)      |
| Painful micturition, unspecified                                                     | 1 (0.1)      |
| Abnormalities of gait and mobility                                                   | 1 (0.1)      |
| Rash and other nonspecific skin eruption                                             | 1 (0.1)      |
| Other specified symptoms and signs involving the circulatory and respiratory systems | 1 (0.1)      |
| Hemorrhage from respiratory passages                                                 | 1 (0.1)      |
| Gangrene, not elsewhere classified                                                   | 1 (0.1)      |
| Congenital posterior urethral valves                                                 | 1 (0.1)      |
| Polycystic kidney, unspecified                                                       | 1 (0.1)      |
| Congenital pulmonary valve stenosis                                                  | 1 (0.1)      |
| Congenital hydrocephalus                                                             | 1 (0.1)      |
| Hypoxic ischemic encephalopathy of newborn                                           | 1 (0.1)      |
| Maternal care for breech presentation                                                | 1 (0.1)      |
| Other specified pregnancy-related conditions                                         | 1 (0.1)      |
| Pre-eclampsia                                                                        | 1 (0.1)      |
| Pre-existing hypertension, complicating pregnancy, childbirth and the puerperium     | 1 (0.1)      |
| Blighted ovum and nonhydatiform mole                                                 | 1 (0.1)      |
| Habitual aborter                                                                     | 1 (0.1)      |
| Complete or unspecified abortion without complication                                | 1 (0.1)      |
| Secondary dysmenorrhea                                                               | 1 (0.1)      |
| Other inflammatory disorders of vagina                                               | 1 (0.1)      |
| Endometriosis                                                                        | 1 (0.1)      |
| Female pelvic inflammatory disorders in diseases classified elsewhere                | 1 (0.1)      |
| Inflammatory disorders of the breast                                                 | 1 (0.1)      |
| Impotence of organic origin                                                          | 1 (0.1)      |
| Redundant prepuce, phimosis and paraphimosis                                         | 1 (0.1)      |
| Orchitis and epididymitis                                                            | 1 (0.1)      |
| Hydrocele and spermatocele                                                           | 1 (0.1)      |
| Inflammatory diseases of the prostate                                                | 1 (0.1)      |
| Urethral disorders in diseases classified elsewhere                                  | 1 (0.1)      |
| Urethral caruncle                                                                    | 1 (0.1)      |
| Urethritis and urethral syndrome                                                     | 1 (0.1)      |
| Unspecified renal colic                                                              | 1 (0.1)      |
| Unspecified kidney failure                                                           | 1 (0.1)      |

**Supplement 1: Frequency distribution of all study variables (continued)**

| <b>Characteristic (N =993)</b>                                                                       | <b>n (%)</b> |
|------------------------------------------------------------------------------------------------------|--------------|
| Obstructive and reflux uropathy                                                                      | 1 (0.1)      |
| Hydronephrosis with ureteral stricture, not elsewhere classified                                     | 1 (0.1)      |
| Chronic nephritic syndrome                                                                           | 1 (0.1)      |
| Periprosthetic fracture around internal prosthetic joint                                             | 1 (0.1)      |
| Other disorders of bone density and structure                                                        | 1 (0.1)      |
| Short Achilles tendon (acquired)                                                                     | 1 (0.1)      |
| Spontaneous rupture of synovium and tendon                                                           | 1 (0.1)      |
| Discitis, unspecified                                                                                | 1 (0.1)      |
| Other acquired deformities of limbs                                                                  | 1 (0.1)      |
| Acquired deformities of fingers and toes                                                             | 1 (0.1)      |
| Arthrosis, unspecified                                                                               | 1 (0.1)      |
| Other specific arthropathies                                                                         | 1 (0.1)      |
| Seropositive rheumatoid arthritis                                                                    | 1 (0.1)      |
| Ulcer of lower limb, not elsewhere classified                                                        | 1 (0.1)      |
| Lichen planus                                                                                        | 1 (0.1)      |
| Unspecified contact dermatitis due to other chemical products                                        | 1 (0.1)      |
| Other local infection of skin and subcutaneous tissue                                                | 1 (0.1)      |
| Pilonidal cyst without abscess                                                                       | 1 (0.1)      |
| Cholelithiasis                                                                                       | 1 (0.1)      |
| Alcoholic hepatic failure                                                                            | 1 (0.1)      |
| Malignant neoplasm of rectum                                                                         | 1 (0.1)      |
| Malignant neoplasm of stomach                                                                        | 1 (0.1)      |
| Malignant neoplasm of liver and intrahepatic bile ducts                                              | 1 (0.1)      |
| Malignant neoplasm of other and ill-defined sites in the respiratory system and intrathoracic organs | 1 (0.1)      |
| HIV disease resulting in other specified diseases                                                    | 1 (0.1)      |
| Foodborne staphylococcal intoxication                                                                | 1 (0.1)      |
| Rotaviral enteritis                                                                                  | 1 (0.1)      |
| Other and unspecified syphilis                                                                       | 1 (0.1)      |
| Chlamydial infection of lower genitourinary tract                                                    | 1 (0.1)      |
| Anogenital herpesviral infection, unspecified                                                        | 1 (0.1)      |
| Anogenital (venereal) warts                                                                          | 1 (0.1)      |
| Unspecified sexually transmitted disease                                                             | 1 (0.1)      |
| Enteroviral exanthematous fever                                                                      | 1 (0.1)      |
| Other mosquito-borne viral fevers                                                                    | 1 (0.1)      |

**Supplement 1: Frequency distribution of all study variables (continued)**

| <b>Characteristic (N = 993)</b>                                                                    | <b>n (%)</b> |
|----------------------------------------------------------------------------------------------------|--------------|
| Measles without complications                                                                      | 1 (0.1)      |
| Other viral infections characterized by skin and mucous membrane lesions, not elsewhere classified | 1 (0.1)      |
| Unspecified viral hepatitis without hepatic coma                                                   | 1 (0.1)      |
| Subcutaneous phaeomycotic abscess and cyst                                                         | 1 (0.1)      |
| Other cestode infections                                                                           | 1 (0.1)      |
| Onchocerciasis                                                                                     | 1 (0.1)      |
| Strongyloidiasis                                                                                   | 1 (0.1)      |
| Trichiuriasis                                                                                      | 1 (0.1)      |
| Enterobiasis                                                                                       | 1 (0.1)      |
| Sequelae of tuberculosis                                                                           | 1 (0.1)      |
| Malignant neoplasm of the palate                                                                   | 1 (0.1)      |
| Malignant neoplasm of the tonsil, unspecified                                                      | 1 (0.1)      |
| Malignant neoplasm of piriform sinus                                                               | 1 (0.1)      |
| Malignant neoplasm of hypopharynx, unspecified                                                     | 1 (0.1)      |
| Malignant neoplasm of the bone and articular cartilage, unspecified                                | 1 (0.1)      |
| Kaposi sarcoma                                                                                     | 1 (0.1)      |
| Malignant neoplasm of peripheral nerves of lower limb, including hip                               | 1 (0.1)      |
| Malignant neoplasm of ovary                                                                        | 1 (0.1)      |
| Malignant neoplasm of the testis                                                                   | 1 (0.1)      |
| Malignant neoplasm of the kidney, except renal pelvis                                              | 1 (0.1)      |
| Malignant (primary) neoplasm, unspecified                                                          | 1 (0.1)      |
| Hodgkin lymphoma                                                                                   | 1 (0.1)      |
| Non-follicular lymphoma                                                                            | 1 (0.1)      |
| Mediastinal (thymic) large B-cell lymphoma                                                         | 1 (0.1)      |
| Other specified types T/NK-cell lymphoma                                                           | 1 (0.1)      |
| Chronic lymphocytic leukemia of B-cell type                                                        | 1 (0.1)      |
| Benign neoplasm of mouth and pharynx                                                               | 1 (0.1)      |
| Benign neoplasm of parotid gland                                                                   | 1 (0.1)      |
| Other benign neoplasms of connective and other soft tissue                                         | 1 (0.1)      |
| Benign neoplasm of the breast                                                                      | 1 (0.1)      |
| Benign neoplasm of the prostate                                                                    | 1 (0.1)      |
| Benign neoplasm of the brain and other parts of the central nervous system                         | 1 (0.1)      |
| Benign neoplasm of other and unspecified endocrine glands                                          | 1 (0.1)      |
| Folate deficiency anemia                                                                           | 1 (0.1)      |

**Supplement 1: Frequency distribution of all study variables (continued)**

| <b>Characteristic (N = 993)</b>                                     | <b>n (%)</b> |
|---------------------------------------------------------------------|--------------|
| Iodine-deficiency-related (endemic) goiter, unspecified             | 1 (0.1)      |
| Polycystic ovarian syndrome                                         | 1 (0.1)      |
| Vitamin A deficiency, unspecified                                   | 1 (0.1)      |
| Niacin deficiency (pellagra)                                        | 1 (0.1)      |
| Ascorbic acid deficiency                                            | 1 (0.1)      |
| Dietary calcium deficiency                                          | 1 (0.1)      |
| Lipid storage disorder, unspecified                                 | 1 (0.1)      |
| Mental and behavioral disorders due to use of alcohol               | 1 (0.1)      |
| Schizotypal disorder                                                | 1 (0.1)      |
| Mild depressive episode                                             | 1 (0.1)      |
| Recurrent depressive disorder                                       | 1 (0.1)      |
| Unspecified mental retardation                                      | 1 (0.1)      |
| Secondary parkinsonism, unspecified                                 | 1 (0.1)      |
| Essential tremor                                                    | 1 (0.1)      |
| Other demyelinating diseases of central nervous system              | 1 (0.1)      |
| Nerve root and plexus disorder, unspecified                         | 1 (0.1)      |
| Diabetic polyneuropathy                                             | 1 (0.1)      |
| Other specified disorders of brain in diseases classified elsewhere | 1 (0.1)      |
| Other disorders of nervous system in diseases classified elsewhere  | 1 (0.1)      |
| Disorders of lacrimal system                                        | 1 (0.1)      |
| Disorders of orbit                                                  | 1 (0.1)      |
| Chorioretinal inflammation                                          | 1 (0.1)      |
| Diabetic retinopathy                                                | 1 (0.1)      |
| Disorders of globe                                                  | 1 (0.1)      |
| Optic atrophy                                                       | 1 (0.1)      |
| Otitis externa in mycoses                                           | 1 (0.1)      |
| Hearing loss, unspecified                                           | 1 (0.1)      |
| Hypertensive heart and renal disease                                | 1 (0.1)      |
| Angina pectoris                                                     | 1 (0.1)      |
| Other nonrheumatic mitral valve disorders                           | 1 (0.1)      |
| Endocarditis, valve unspecified                                     | 1 (0.1)      |
| Other conduction disorders                                          | 1 (0.1)      |
| Other cardiac arrhythmias                                           | 1 (0.1)      |
| Other cerebrovascular diseases                                      | 1 (0.1)      |
| Abdominal aortic aneurysm, ruptured                                 | 1 (0.1)      |

**Supplement 1: Frequency distribution of all study variables (continued)**

| <b>Characteristic (N = 993)</b>                                           | <b>n (%)</b> |
|---------------------------------------------------------------------------|--------------|
| Phlebitis and thrombophlebitis of femoral vein                            | 1 (0.1)      |
| Post procedural disorders of circulatory system, not elsewhere classified | 1 (0.1)      |
| Influenza due to identified seasonal influenza virus                      | 1 (0.1)      |
| Influenza, virus not identified                                           | 1 (0.1)      |
| Pneumonia due to other specified infectious organisms                     | 1 (0.1)      |
| Peritonsillar abscess                                                     | 1 (0.1)      |
| Unspecified chronic bronchitis                                            | 1 (0.1)      |
| Status asthmaticus                                                        | 1 (0.1)      |
| Hypersensitivity pneumonitis due to organic dust                          | 1 (0.1)      |
| Pneumonitis due to solids and liquids                                     | 1 (0.1)      |
| Adult respiratory distress syndrome                                       | 1 (0.1)      |
| Other disorders of tooth development                                      | 1 (0.1)      |
| Impacted teeth                                                            | 1 (0.1)      |
| Disorders of teeth and supporting structures, unspecified                 | 1 (0.1)      |
| Other cysts of jaw                                                        | 1 (0.1)      |
| Other diseases of jaws                                                    | 1 (0.1)      |
| Other diseases of lip and oral mucosa                                     | 1 (0.1)      |
| Esophagitis                                                               | 1 (0.1)      |
| Functional dyspepsia                                                      | 1 (0.1)      |
| Acute appendicitis                                                        | 1 (0.1)      |
| Incisional hernia without obstruction or gangrene                         | 1 (0.1)      |
| Other abdominal hernia                                                    | 1 (0.1)      |
| Ulcerative (chronic) pancolitis                                           | 1 (0.1)      |
| Other specified noninfective gastroenteritis and colitis                  | 1 (0.1)      |
| Anal fissure, unspecified                                                 | 1 (0.1)      |
| Anorectal fistula                                                         | 1 (0.1)      |
| Chronic hepatitis, not elsewhere classified                               | 1 (0.1)      |
| <b>Any Procedure/Surgery done (N = 993)</b>                               |              |
| No                                                                        | 940 (94.7)   |
| Yes                                                                       | 53 (5.3)     |
| <b>Type of Procedure/Surgery (N = 53)</b>                                 |              |
| Minor                                                                     | 25 (47.2)    |
| Major                                                                     | 7 (13.2)     |
| Specialized                                                               | 21 (39.6)    |

| <b>Supplement 1: Frequency distribution of all study variables (continued)</b> |              |
|--------------------------------------------------------------------------------|--------------|
| <b>Characteristic</b>                                                          | <b>n (%)</b> |
| <b>Length of stay in days (n = 17)</b>                                         |              |
| Mean (SD) = 6.1 (5.7), Median = 3                                              |              |
| 1                                                                              | 3 (17.6)     |
| 2                                                                              | 4 (23.5)     |
| 3                                                                              | 2 (11.8)     |
| 5                                                                              | 1 (5.9)      |
| 6                                                                              | 1 (5.9)      |
| 7                                                                              | 1 (5.9)      |
| 8                                                                              | 1 (5.9)      |
| 14                                                                             | 2 (11.8)     |
| 15                                                                             | 1 (5.9)      |
| 18                                                                             | 1 (5.9)      |
| <b>Prescriber Qualification (N = 993)</b>                                      |              |
| Clinical Officer/Dental Therapist                                              | 132 (13.3)   |
| Assistant Medical/Dental Officer                                               | 18 (1.8)     |
| Medical/Dental Officer                                                         | 320 (32.2)   |
| Specialist                                                                     | 437 (44.0)   |
| Super-specialist/Consultant                                                    | 86 (8.7)     |
| <b>Prescriber Qualification Grouped (N = 993)</b>                              |              |
| Low level (Clinical Officers or Assistant Medical/Dental Officers)             | 150 (15.1)   |
| Mid-level (Doctor of Medicine/Doctor of Dental Surgery)                        | 320 (32.2)   |
| High level (Specialists/Consultants)                                           | 523 (52.7)   |
| <b>Any Medication Prescribed (N = 993)</b>                                     |              |
| No                                                                             | 223 (22.5)   |
| Yes                                                                            | 770 (77.5)   |
| <b>Number of Medications in the prescription (N = 770)</b>                     |              |
| Mean (SD) = 3.0 (1.7), Median = 3.0                                            |              |
| 1                                                                              | 117 (15.2)   |
| 2                                                                              | 209 (27.1)   |
| 3                                                                              | 212 (27.5)   |
| 4                                                                              | 118 (15.3)   |
| 5                                                                              | 55 (7.1)     |
| 6                                                                              | 39 (5.1)     |
| 7                                                                              | 11 (1.4)     |
| 8                                                                              | 6 (0.8)      |
| 10                                                                             | 2 (0.3)      |

| <b>Supplement 1: Frequency distribution of all study variables (continued)</b>                     |              |
|----------------------------------------------------------------------------------------------------|--------------|
| <b>Characteristic (N = 770)</b>                                                                    | <b>n (%)</b> |
| 13                                                                                                 | 1 (0.1)      |
| <b>Polypharmacy of &gt; 3 Medications</b>                                                          |              |
| No                                                                                                 | 538 (69.9)   |
| Yes                                                                                                | 232 (30.1)   |
| <b>Polypharmacy of <math>\geq</math> 5 Medications</b>                                             |              |
| No                                                                                                 | 657 (85.3)   |
| Yes                                                                                                | 113 (14.7)   |
| <b>Receipt of an antibiotic prescription (N = 770)</b>                                             |              |
| No                                                                                                 | 413 (53.6)   |
| Yes                                                                                                | 357 (46.4)   |
| <b>Receipt of more than one antibiotic prescription (N = 357)</b>                                  |              |
| No                                                                                                 | 286 (80.1)   |
| Yes                                                                                                | 70 (19.6)    |
| <b>Antibiotics prescribed according to TZ STG2017 recommendation with respect to HFL (N = 357)</b> |              |
| No                                                                                                 | 28 (7.8)     |
| Yes                                                                                                | 329 (92.2)   |
