# Supplementary material for: Factors influencing receipt of an antibiotic prescription among insured patients in Tanzania: a cross-sectional study
Source: PubMed Central journal article supplement — BMJ Open. 2022 Nov 4;12(11):e062147. doi: 10.1136/bmjopen-2022-062147 (PMC9639089; doi:10.1136/bmjopen-2022-062147), 2022-11-04
Supplement: bmjopen-2022-062147supp002.pdf [file bmjopen-2022-062147supp002.pdf]

**Supplement 2: Study characteristics by receipt of antibiotic prescription**

| Characteristic (N = 770)                                | Antibiotic prescription, n (%) |            | P value |
|---------------------------------------------------------|--------------------------------|------------|---------|
|                                                         | No                             | Yes        |         |
| <b>Age in years</b>                                     |                                |            |         |
| Children (< 18 years)                                   | 73 (34.6)                      | 138 (65.4) | < 0.01  |
| Adults (18-59 years)                                    | 223 (54.8)                     | 184 (45.2) |         |
| Elderly (≥ 60 years)                                    | 117 (77.0)                     | 35 (23.0)  |         |
| <b>Sex</b>                                              |                                |            |         |
| Male                                                    | 165 (52.2)                     | 151 (47.8) | 0.51    |
| Female                                                  | 248 (54.6)                     | 206 (45.4) |         |
| <b>Level of health facility</b>                         |                                |            |         |
| Dispensary                                              | 23 (23.0)                      | 77 (77.0)  | < 0.01  |
| Health Centre/Stand-alone clinic by ADO                 | 39 (36.4)                      | 68 (63.6)  |         |
| District Hospital/Clinic L1 by MO/DO                    | 26 (28.0)                      | 67 (72.0)  |         |
| Regional Hospital/Clinic L2 by specialist               | 70 (68.0)                      | 33 (32.0)  |         |
| Referral/National/Zonal Hospital/Clinic L3 by SS        | 255 (69.5)                     | 112 (30.5) |         |
| <b>Ownership of health facility</b>                     |                                |            |         |
| Public                                                  | 195 (62.7)                     | 116 (37.3) | < 0.01  |
| Private/Non-governmental                                | 218 (47.5)                     | 241 (52.5) |         |
| <b>Department visited</b>                               |                                |            |         |
| Outpatient                                              | 408 (54.2)                     | 345 (45.8) | 0.04    |
| Inpatient                                               | 5 (29.4)                       | 12 (70.6)  |         |
| <b>Select Diagnosis</b>                                 |                                |            |         |
| <b>Other disorders of urinary system</b>                |                                |            |         |
| No                                                      | 407 (60.3)                     | 268 (39.7) | < 0.01  |
| Yes                                                     | 6 (6.3)                        | 89 (93.7)  |         |
| <b>Acute and URTI of multiple and unspecified sites</b> |                                |            |         |
| No                                                      | 400 (56.7)                     | 306 (43.3) | < 0.01  |
| Yes                                                     | 13 (20.3)                      | 51 (79.7)  |         |
| <b>Other sepsis</b>                                     |                                |            |         |
| No                                                      | 409 (54.8)                     | 338 (45.2) | < 0.01* |
| Yes                                                     | 4 (17.4)                       | 19 (82.6)  |         |
| <b>Acute tonsillitis</b>                                |                                |            |         |
| No                                                      | 412 (55.2)                     | 334 (44.8) | < 0.01* |
| Yes                                                     | 1 (4.2)                        | 23 (95.8)  |         |

p-values are from Pearson Chi-Square Test or Fisher's Exact Test (\*); SS, Super Specialist

| <b>Supplement 2: Study characteristics by receipt of antibiotic prescription (Continued)</b> |                                       |            |                |
|----------------------------------------------------------------------------------------------|---------------------------------------|------------|----------------|
| <b>Characteristic (N = 770)</b>                                                              | <b>Antibiotic prescription, n (%)</b> |            | <b>P value</b> |
|                                                                                              | <b>No</b>                             | <b>Yes</b> |                |
| <b>Diseases of pulp and periapical tissues</b>                                               |                                       |            |                |
| No                                                                                           | 413 (54.3)                            | 347 (45.7) | < 0.01*        |
| Yes                                                                                          | 0 (0.0)                               | 10 (100.0) |                |
| <b>Candidiasis</b>                                                                           |                                       |            |                |
| No                                                                                           | 411 (54.4)                            | 345 (45.6) | 0.01           |
| Yes                                                                                          | 2 (14.3)                              | 12 (85.7)  |                |
| <b>Bacterial infection of unspecified site</b>                                               |                                       |            |                |
| No                                                                                           | 411 (54.2)                            | 348 (45.8) | 0.03*          |
| Yes                                                                                          | 2 (18.2)                              | 9 (81.8)   |                |
| <b>Pneumonia, unspecified organism</b>                                                       |                                       |            |                |
| No                                                                                           | 411 (54.1)                            | 349 (45.9) | 0.05*          |
| Yes                                                                                          | 2 (20.0)                              | 8 (80.0)   |                |
| <b>Cystitis</b>                                                                              |                                       |            |                |
| No                                                                                           | 413 (54.3)                            | 348 (45.7) | < 0.01*        |
| Yes                                                                                          | 0 (0.0)                               | 9 (100.0)  |                |
| <b>Other female pelvic inflammatory diseases</b>                                             |                                       |            |                |
| No                                                                                           | 412 (54.0)                            | 351 (46.0) | 0.05*          |
| Yes                                                                                          | 1 (14.3)                              | 6 (85.7)   |                |
| <b>Other disorders of bladder</b>                                                            |                                       |            |                |
| No                                                                                           | 413 (54.1)                            | 350 (45.9) | < 0.01*        |
| Yes                                                                                          | 0 (0.0)                               | 7 (100.0)  |                |
| <b>Amoebiasis</b>                                                                            |                                       |            |                |
| No                                                                                           | 413 (54.1)                            | 350 (45.9) | < 0.01*        |
| Yes                                                                                          | 0 (0.0)                               | 7 (100.0)  |                |
| <b>Cellulitis</b>                                                                            |                                       |            |                |
| No                                                                                           | 413 (53.9)                            | 353 (46.1) | 0.05*          |
| Yes                                                                                          | 0 (0.0)                               | 4 (100.0)  |                |
| <b>Infections of genitourinary tract in pregnancy</b>                                        |                                       |            |                |
| No                                                                                           | 413 (53.9)                            | 353 (46.1) | 0.05*          |
| Yes                                                                                          | 0 (0.0)                               | 4 (100.0)  |                |
| <b>Chronic rhinitis, nasopharyngitis and pharyngitis</b>                                     |                                       |            |                |
| No                                                                                           | 413 (53.9)                            | 353 (46.1) | 0.05*          |
| Yes                                                                                          | 0 (0.0)                               | 4 (100.0)  |                |

p-values are from Pearson Chi-Square Test or Fisher's Exact Test (\*)

| <b>Supplement 2: Study characteristics by receipt of antibiotic prescription (Continued)</b> |                                       |            |                |
|----------------------------------------------------------------------------------------------|---------------------------------------|------------|----------------|
| <b>Characteristic (N = 770)</b>                                                              | <b>Antibiotic prescription, n (%)</b> |            | <b>P value</b> |
|                                                                                              | <b>No</b>                             | <b>Yes</b> |                |
| <b>Cutaneous abscess, furuncle and carbuncle</b>                                             |                                       |            |                |
| No                                                                                           | 413 (53.9)                            | 353 (46.1) | 0.05*          |
| Yes                                                                                          | 0 (0.0)                               | 4 (100.0)  |                |
| <b>Other gastroenteritis and colitis of infectious and unspecified origin</b>                |                                       |            |                |
| No                                                                                           | 412 (54.0)                            | 351 (46.0) | 0.05*          |
| Yes                                                                                          | 1 (14.3)                              | 6 (85.7)   |                |
| <b>Acute nasopharyngitis (common cold)</b>                                                   |                                       |            |                |
| No                                                                                           | 404 (54.1)                            | 343 (45.9) | 0.16           |
| Yes                                                                                          | 9 (39.1)                              | 14 (60.9)  |                |
| <b>Conjunctivitis</b>                                                                        |                                       |            |                |
| No                                                                                           | 408 (54.0)                            | 347 (46.0) | 0.11           |
| Yes                                                                                          | 5 (33.3)                              | 10 (66.7)  |                |
| <b>Cough</b>                                                                                 |                                       |            |                |
| No                                                                                           | 408 (54.1)                            | 346 (45.9) | 0.07           |
| Yes                                                                                          | 5 (31.3)                              | 11 (68.8)  |                |
| <b>Gingivitis and periodontal diseases</b>                                                   |                                       |            |                |
| No                                                                                           | 412 (53.9)                            | 353 (46.1) | 0.19*          |
| Yes                                                                                          | 1 (20.0)                              | 4 (80.0)   |                |
| <b>Acute pharyngitis</b>                                                                     |                                       |            |                |
| No                                                                                           | 412 (53.9)                            | 352 (46.1) | 0.10*          |
| Yes                                                                                          | 1 (16.7)                              | 5 (83.3)   |                |
| <b>Bacterial pneumonia, not elsewhere classified</b>                                         |                                       |            |                |
| No                                                                                           | 412 (53.9)                            | 352 (46.1) | 0.10*          |
| Yes                                                                                          | 1 (16.7)                              | 5 (83.3)   |                |
| <b>Unspecified acute lower respiratory infection</b>                                         |                                       |            |                |
| No                                                                                           | 412 (53.9)                            | 353 (46.1) | 0.19*          |
| Yes                                                                                          | 1 (20.0)                              | 4 (80.0)   |                |
| <b>Other diseases of upper respiratory tract</b>                                             |                                       |            |                |
| No                                                                                           | 412 (53.9)                            | 352 (46.1) | 0.10*          |
| Yes                                                                                          | 1 (16.7)                              | 5 (83.3)   |                |

p-values are from Pearson Chi-Square Test or Fisher's Exact Test (\*)

| <b>Supplement 2: Study characteristics by receipt of antibiotic prescription (Continued)</b> |                                       |            |                |
|----------------------------------------------------------------------------------------------|---------------------------------------|------------|----------------|
| <b>Characteristic (N = 770)</b>                                                              | <b>Antibiotic prescription, n (%)</b> |            | <b>P value</b> |
|                                                                                              | <b>No</b>                             | <b>Yes</b> |                |
| <b>Otitis externa</b>                                                                        |                                       |            |                |
| No                                                                                           | 413 (53.8)                            | 354 (46.2) | 0.10*          |
| Yes                                                                                          | 0 (0.0)                               | 3 (100.0)  |                |
| <b>Single delivery by caesarean section</b>                                                  |                                       |            |                |
| No                                                                                           | 413 (53.8)                            | 354 (46.2) | 0.10*          |
| Yes                                                                                          | 0 (0.0)                               | 3 (100.0)  |                |
| <b>Abdominal and pelvic pain</b>                                                             |                                       |            |                |
| No                                                                                           | 413 (53.8)                            | 355 (46.2) | 0.22*          |
| Yes                                                                                          | 0 (0.0)                               | 2 (100.0)  |                |
| <b>Impetigo</b>                                                                              |                                       |            |                |
| No                                                                                           | 413 (53.8)                            | 354 (46.2) | 0.10*          |
| Yes                                                                                          | 0 (0.0)                               | 3 (100.0)  |                |
| <b>Osteomyelitis</b>                                                                         |                                       |            |                |
| No                                                                                           | 413 (53.8)                            | 355 (46.2) | 0.22*          |
| Yes                                                                                          | 0 (0.0)                               | 2 (100.0)  |                |
| <b>Non-suppurative otitis media</b>                                                          |                                       |            |                |
| No                                                                                           | 413 (53.8)                            | 355 (46.2) | 0.22*          |
| Yes                                                                                          | 0 (0.0)                               | 2 (100.0)  |                |
| <b>Suppurative and unspecified otitis media</b>                                              |                                       |            |                |
| No                                                                                           | 413 (53.8)                            | 355 (46.2) | 0.22*          |
| Yes                                                                                          | 0 (0.0)                               | 2 (100.0)  |                |
| <b>Acute sinusitis</b>                                                                       |                                       |            |                |
| No                                                                                           | 413 (53.8)                            | 355 (46.2) | 0.22*          |
| Yes                                                                                          | 0 (0.0)                               | 2 (100.0)  |                |
| <b>Respiratory disorders in diseases classified elsewhere</b>                                |                                       |            |                |
| No                                                                                           | 413 (53.8)                            | 355 (46.2) | 0.22*          |
| Yes                                                                                          | 0 (0.0)                               | 2 (100.0)  |                |
| <b>Dislocation of wrist</b>                                                                  |                                       |            |                |
| No                                                                                           | 413 (53.8)                            | 355 (46.2) | 0.22*          |
| Yes                                                                                          | 0 (0.0)                               | 2 (100.0)  |                |
| <b>Any Procedure/Surgery done</b>                                                            |                                       |            |                |
| No                                                                                           | 403 (54.4)                            | 338 (45.6) | <b>0.04</b>    |
| Yes                                                                                          | 10 (34.5)                             | 19 (65.5)  |                |

p-values are from Pearson Chi-Square Test or Fisher's Exact Test (\*)

| <b>Supplement 2: Study characteristics by receipt of antibiotic prescription (Continued)</b> |                                       |            |                |
|----------------------------------------------------------------------------------------------|---------------------------------------|------------|----------------|
| <b>Characteristic</b>                                                                        | <b>Antibiotic prescription, n (%)</b> |            | <b>P value</b> |
|                                                                                              | <b>No</b>                             | <b>Yes</b> |                |
| <b>Type of Procedure/Surgery (N = 29)</b>                                                    |                                       |            |                |
| Minor                                                                                        | 4 (40.0)                              | 6 (60.0)   | 0.71*          |
| Major                                                                                        | 0 (0.0)                               | 7 (100.0)  |                |
| Specialized                                                                                  | 6 (50.0)                              | 6 (50.0)   |                |
| <b>Prescriber Qualification (N = 770)</b>                                                    |                                       |            |                |
| Clinical Officer/ Dental Therapist                                                           | 27 (21.3)                             | 100 (78.7) | < 0.01*        |
| Assistant Medical Officer/Assistant Dental Officer                                           | 3 (20.0)                              | 12 (80.0)  |                |
| Medical Officer/Dental Officer                                                               | 136 (48.6)                            | 144 (51.4) |                |
| Specialist                                                                                   | 200 (69.7)                            | 87 (30.3)  |                |
| Super-specialist/Consultant                                                                  | 47 (77.0)                             | 14 (23.0)  |                |
| <b>Prescriber Qualification Grouped (N = 770)</b>                                            |                                       |            |                |
| Low level (Clinical Officer/DT/AMO/ADO)                                                      | 30 (21.1)                             | 112 (78.9) | < 0.01         |
| Mid-level (Medical/Dental Officer)                                                           | 136 (48.9)                            | 144 (51.4) |                |
| High level (Specialists/Consultants)                                                         | 247 (71.0)                            | 101 (29.0) |                |
| <b>Polypharmacy of ≥ 5 Medications (N = 770)</b>                                             |                                       |            |                |
| No                                                                                           | 346 (52.6)                            | 312 (47.4) | 0.16           |
| Yes                                                                                          | 67 (59.8)                             | 45 (40.2)  |                |
| <b>Availability of all medications prescribed in 2017 TZ NEMLIT (N = 770)</b>                |                                       |            |                |
| No                                                                                           | 220 (72.6)                            | 83 (27.4)  | < 0.01         |
| Yes                                                                                          | 193 (41.3)                            | 274 (58.7) |                |
| <b>All medications prescribed using their generic names (N = 770)</b>                        |                                       |            |                |
| No                                                                                           | 171 (48.9)                            | 179 (51.1) | 0.02           |
| Yes                                                                                          | 242 (57.6)                            | 178 (42.4) |                |
| <b>Was malaria treatment prescribed (N = 770)</b>                                            |                                       |            |                |
| No                                                                                           | 407 (54.2)                            | 344 (45.8) | 0.05           |
| Yes                                                                                          | 6 (31.6)                              | 13 (68.4)  |                |
| <b>Presence of injectable formulation in the prescription (N = 770)</b>                      |                                       |            |                |
| No                                                                                           | 388 (55.0)                            | 317 (45.0) | 0.01           |
| Yes                                                                                          | 25 (38.5)                             | 40 (61.5)  |                |

p-values are from Pearson Chi-Square Test or Fisher's Exact Test (\*); DT, Dental Therapist; AMO, Assistant Medical Officer; ADO, Assistant Dental Officer
