# Supplementary material for: Factors influencing receipt of an antibiotic prescription among insured patients in Tanzania: a cross-sectional study
Source: PubMed Central journal article supplement — BMJ Open. 2022 Nov 4;12(11):e062147. doi: 10.1136/bmjopen-2022-062147 (PMC9639089; doi:10.1136/bmjopen-2022-062147), 2022-11-04
Supplement: bmjopen-2022-062147supp003.pdf [file bmjopen-2022-062147supp003.pdf]

### Supplement 3: Poisson Regression analysis of factors influencing receipt of an antibiotic prescription

| Variable (N = 770)                                            | Univariate Regression |         | Multivariate Regression |         |
|---------------------------------------------------------------|-----------------------|---------|-------------------------|---------|
|                                                               | cPR* (95% CI)         | P value | aPR** (95% CI)          | P value |
| <b>Age in years</b>                                           |                       |         |                         |         |
| Children (< 18 years)                                         | 2.8 (2.1-3.9)         | < 0.001 | 1.7 (1.3-2.2)           | < 0.001 |
| Adults (18-59 years)                                          | 2.0 (1.4-2.7)         | < 0.001 | 1.5 (1.1-1.9)           | 0.004   |
| Elderly (≥ 60 years)                                          | 1 [Ref.]              |         | 1 [Ref.]                |         |
| <b>Sex</b>                                                    |                       |         |                         |         |
| Male                                                          | 1.1 (0.9-1.2)         | 0.51    | Excluded                | NA      |
| Female                                                        | 1 [Ref.]              |         |                         |         |
| <b>Level of health facility</b>                               |                       |         |                         |         |
| Dispensary                                                    | 2.5 (2.1-3.0)         | < 0.001 | 1.3 (0.9-1.8)           | 0.14    |
| Health Centre                                                 | 2.1 (1.7-2.6)         | < 0.001 | 1.5 (1.1-2.0)           | 0.009   |
| District Hospital                                             | 2.4 (1.9-2.9)         | < 0.001 | 1.5 (1.1-1.9)           | 0.004   |
| Regional Referral Hospital                                    | 1.1 (0.8-1.4)         | 0.77    | 1.0 (0.7-1.4)           | 0.97    |
| National Referral Hospital                                    | 1 [Ref.]              |         | 1 [Ref.]                |         |
| <b>Ownership of health facility</b>                           |                       |         |                         |         |
| Public                                                        | 0.7 (0.6-0.8)         | < 0.001 | 1.2 (1.0-1.4)           | 0.03    |
| Private                                                       | 1 [Ref.]              |         | 1 [Ref.]                |         |
| <b>Department visited</b>                                     |                       |         |                         |         |
| Inpatient                                                     | 1.5 (1.1-2.1)         | 0.007   | 2.0 (1.2-3.4)           | 0.01    |
| Outpatient                                                    | 1 [Ref.]              |         | 1 [Ref.]                |         |
| <b>Any Procedure/Surgery done</b>                             |                       |         |                         |         |
| Yes                                                           | 1.4 (1.1-1.9)         | 0.01    | 1.3 (0.8-2.0)           | 0.34    |
| No                                                            | 1 [Ref.]              |         | 1 [Ref.]                |         |
| <b>Prescriber Qualification</b>                               |                       |         |                         |         |
| Clinical Officer/Dental Therapist                             | 3.4 (2.1-5.5)         | < 0.001 | 1.9 (1.2-3.0)           | 0.005   |
| Assistant Medical/Dental Officer                              | 3.5 (2.1-5.9)         | < 0.001 | 2.0 (1.1-3.4)           | 0.02    |
| Medical/Dental Officer                                        | 2.2 (1.4-3.6)         | 0.001   | 1.6 (1.1-2.5)           | 0.03    |
| Specialist                                                    | 1.3 (0.8-2.1)         | 0.27    | 1.3 (0.8-1.9)           | 0.25    |
| Consultant                                                    | 1 [Ref.]              |         | 1 [Ref.]                |         |
| <b>All medications prescribed using their generic names</b>   |                       |         |                         |         |
| No                                                            | 1.2 (1.0-1.4)         | 0.02    | 1.3 (1.1-1.5)           | 0.002   |
| Yes                                                           | 1 [Ref.]              |         | 1 [Ref.]                |         |
| <b>Was malaria treatment prescribed</b>                       |                       |         |                         |         |
| No                                                            | 0.7 (0.5-0.9)         | 0.01    | 1.0 (0.8-1.4)           | 0.77    |
| Yes                                                           | 1 [Ref.]              |         | 1 [Ref.]                |         |
| <b>Presence of injectable formulation in the prescription</b> |                       |         |                         |         |
| Yes                                                           | 1.4 (1.1-1.7)         | 0.003   | 1.4 (1.1-1.8)           | 0.004   |
| No                                                            | 1 [Ref.]              |         | 1 [Ref.]                |         |

\*cPR, Crude Prevalence Ratio; \*\*aPR, Adjusted Prevalence Ratio; CI, Confidence Interval.

**Supplement 3: Poisson Regression analysis of factors influencing receipt of antibiotic prescription (Continued)**

| Variable (N = 770)                                                                  | Univariate Regression |         | Multivariate Regression |         |
|-------------------------------------------------------------------------------------|-----------------------|---------|-------------------------|---------|
|                                                                                     | cPR* (95% CI)         | P value | aPR** (95% CI)          | P value |
| <b>Select Diagnostic Codes</b>                                                      |                       |         |                         |         |
| <b>Other disorders of urinary system - N39</b>                                      |                       |         |                         |         |
| Yes                                                                                 | 2.4 (2.1-2.6)         | < 0.001 | 2.4 (2.1-2.8)           | < 0.001 |
| No                                                                                  | 1 [Ref.]              |         | 1 [Ref.]                |         |
| <b>Acute and URTI of multiple and unspecified sites - J06</b>                       |                       |         |                         |         |
| Yes                                                                                 | 1.8 (1.6-2.1)         | < 0.001 | 1.6 (1.3 – 1.9)         | < 0.001 |
| No                                                                                  | 1 [Ref.]              |         | 1 [Ref.]                |         |
| <b>Other sepsis - A41</b>                                                           |                       |         |                         |         |
| Yes                                                                                 | 1.8 (1.5-2.2)         | < 0.001 | 1.7 (1.2-2.2)           | 0.001   |
| No                                                                                  | 1 [Ref.]              |         | 1 [Ref.]                |         |
| <b>Acute tonsillitis - J03</b>                                                      |                       |         |                         |         |
| Yes                                                                                 | 2.1 (1.9 – 2.4)       | < 0.001 | 2.3 (1.8 – 3.0)         | < 0.001 |
| No                                                                                  | 1 [Ref.]              |         | 1 [Ref.]                |         |
| <b>Candidiasis - B37</b>                                                            |                       |         |                         |         |
| Yes                                                                                 | 1.9 (1.5 – 2.4)       | < 0.001 | 1.6 (1.2 – 2.1)         | 0.002   |
| No                                                                                  | 1 [Ref.]              |         | 1 [Ref.]                |         |
| <b>Bacterial infection of unspecified site - A49</b>                                |                       |         |                         |         |
| Yes                                                                                 | 1.8 (1.3 – 2.4)       | < 0.001 | 2.1 (1.5 – 2.8)         | < 0.001 |
| No                                                                                  | 1 [Ref.]              |         | 1 [Ref.]                |         |
| <b>Pneumonia, unspecified organism - J18</b>                                        |                       |         |                         |         |
| Yes                                                                                 | 1.7 (1.3 – 2.4)       | 0.001   | 1.5 (0.8 – 2.9)         | 0.18    |
| No                                                                                  | 1 [Ref.]              |         | 1 [Ref.]                |         |
| <b>Other female pelvic inflammatory diseases - N73</b>                              |                       |         |                         |         |
| Yes                                                                                 | 1.9 (1.4 – 2.5)       | < 0.001 | 1.7 (1.2 – 2.5)         | 0.004   |
| No                                                                                  | 1 [Ref.]              |         | 1 [Ref.]                |         |
| <b>Other gastroenteritis and colitis of infectious and unspecified origin - A09</b> |                       |         |                         |         |
| Yes                                                                                 | 1.9 (1.4 – 2.5)       | < 0.001 | 1.4 (0.9 – 2.0)         | 0.14    |
| No                                                                                  | 1 [Ref.]              |         | 1 [Ref.]                |         |
| <b>Gingivitis and periodontal disease - K05</b>                                     |                       |         |                         |         |
| Yes                                                                                 | 1.7 (1.1 – 2.7)       | 0.02    | 1.9 (1.2 – 2.9)         | 0.004   |
| No                                                                                  | 1 [Ref.]              |         | 1 [Ref.]                |         |
| <b>Cough - R05</b>                                                                  |                       |         |                         |         |
| Yes                                                                                 | 1.5 (1.1 – 2.1)       | 0.02    | 1.0 (0.7 – 1.4)         | 0.90    |
| No                                                                                  | 1 [Ref.]              |         | 1 [Ref.]                |         |

\*cPR, Crude Prevalence Ratio; \*\*aOR, Adjusted Prevalence Ratio; CI, Confidence Interval

**Supplement 3: Poisson Regression analysis of factors influencing receipt of antibiotic prescription (Continued)**

| Variable (N = 770)                                             | Univariate Regression |         | Multivariate Regression |         |
|----------------------------------------------------------------|-----------------------|---------|-------------------------|---------|
|                                                                | cPR* (95% CI)         | P value | aPR** (95% CI)          | P value |
| <b>Conjunctivitis - H10</b>                                    |                       |         |                         |         |
| Yes                                                            | 1.5 (1.0 – 2.1)       | 0.05    | 1.6 (1.0 – 2.7)         | 0.05    |
| No                                                             | 1 [Ref.]              |         | 1 [Ref.]                |         |
| <b>Amoebiasis - A06</b>                                        |                       |         |                         |         |
| Yes                                                            | 2.2 (2.0 – 2.4)       | < 0.001 | 2.1 (1.5 – 2.9)         | < 0.001 |
| No                                                             | 1 [Ref.]              |         | 1 [Ref.]                |         |
| <b>Otitis Externa – H60</b>                                    |                       |         |                         |         |
| Ref                                                            | 2.2 (2.0 – 2.4)       | < 0.001 | 0.8 (0.2 – 2.7)         | 0.70    |
| No                                                             | 1 [Ref.]              |         | 1 [Ref.]                |         |
| <b>Acute nasopharyngitis (common cold) - J00</b>               |                       |         |                         |         |
| Yes                                                            | 1.3 (0.9 – 1.9)       | 0.10    | 0.7 (0.5 – 1.1)         | 0.10    |
| No                                                             | 1 [Ref.]              |         | 1 [Ref.]                |         |
| <b>Acute pharyngitis – J02</b>                                 |                       |         |                         |         |
| Yes                                                            | 1.8 (1.3 – 2.6)       | 0.002   | 2.7 (1.1 – 6.3)         | 0.03    |
| No                                                             | 1 [Ref.]              |         | 1 [Ref.]                |         |
| <b>Bacterial pneumonia not elsewhere classified - J15</b>      |                       |         |                         |         |
| Yes                                                            | 1.8 (1.3 – 2.6)       | 0.002   | 1.2 (0.8 – 1.6)         | 0.30    |
| No                                                             | 1 [Ref.]              |         | 1 [Ref.]                |         |
| <b>Unspecified acute lower respiratory infection - J22</b>     |                       |         |                         |         |
| Yes                                                            | 1.7 (1.1 – 2.7)       | 0.02    | 1.5 (1.0 – 2.2)         | 0.05    |
| No                                                             | 1 [Ref.]              |         | 1 [Ref.]                |         |
| <b>Chronic rhinitis, nasopharyngitis and pharyngitis - J31</b> |                       |         |                         |         |
| Yes                                                            | 2.2 (2.0 – 2.3)       | < 0.001 | 4.0 (2.4 – 6.4)         | < 0.001 |
| No                                                             | 1 [Ref.]              |         | 1 [Ref.]                |         |
| <b>Other diseases of upper respiratory tract - J39</b>         |                       |         |                         |         |
| Yes                                                            | 1.8 (1.3 – 2.6)       | 0.002   | 1.1 (0.7 – 1.7)         | 0.80    |
| No                                                             | 1 [Ref.]              |         | 1 [Ref.]                |         |
| <b>Disease of the pulp and periapical tissues - K04</b>        |                       |         |                         |         |
| Yes                                                            | 2.2 (2.0 – 2.4)       | < 0.001 | 3.4 (2.3 – 4.8)         | < 0.001 |
| No                                                             | 1 [Ref.]              |         | 1 [Ref.]                |         |
| <b>Impetigo - L01</b>                                          |                       |         |                         |         |
| Yes                                                            | 2.2 (2.0 – 2.3)       | < 0.001 | 2.4 (1.2 – 4.7)         | 0.01    |
| No                                                             | 1 [Ref.]              |         | 1 [Ref.]                |         |

\*cPR, Crude Prevalence Ratio; \*\*aPR, Adjusted Prevalence Ratio; CI, Confidence Interval

---

**Supplement 3: Poisson Regression analysis of factors influencing receipt of an antibiotic prescription (Continued)**


---

| Variable (N = 770)                                          | Univariate Regression |         | Multivariate Regression |         |
|-------------------------------------------------------------|-----------------------|---------|-------------------------|---------|
|                                                             | cPR* (95% CI)         | P value | aPR** (95% CI)          | P value |
| <b>Cutaneous abscess, furuncle and carbuncle - L02</b>      |                       |         |                         |         |
| Yes                                                         | 2.2 (2.0 – 2.3)       | < 0.001 | 3.0 (1.9 – 4.9)         | < 0.001 |
| No                                                          | 1 [Ref.]              |         | 1 [Ref.]                |         |
| <b>Cellulitis - L03</b>                                     |                       |         |                         |         |
| Yes                                                         | 2.2 (2.0 – 2.3)       | < 0.001 | 2.4 (1.8 – 3.2)         | < 0.001 |
| No                                                          | 1 [Ref.]              |         | 1 [Ref.]                |         |
| <b>Cystitis - N30</b>                                       |                       |         |                         |         |
| Yes                                                         | 2.2 (2.0 – 2.4)       | < 0.001 | 2.7 (2.1 – 3.5)         | < 0.001 |
| No                                                          | 1 [Ref.]              |         | 1 [Ref.]                |         |
| <b>Other disorders of bladder - N32</b>                     |                       |         |                         |         |
| Yes                                                         | 2.2 (2.0 – 2.3)       | < 0.001 | 3.5 (2.5 – 4.8)         | < 0.001 |
| No                                                          | 1 [Ref.]              |         | 1 [Ref.]                |         |
| <b>Infections of genitourinary tract in pregnancy - O23</b> |                       |         |                         |         |
| Yes                                                         | 2.2 (2.0 – 2.3)       | < 0.001 | 2.9 (2.1 – 4.0)         | < 0.001 |
| No                                                          | 1 [Ref.]              |         | 1 [Ref.]                |         |
| <b>Single delivery by caesarean section - O82</b>           |                       |         |                         |         |
| Yes                                                         | 2.2 (2.0 – 2.3)       | < 0.001 | 1.7 (0.8 – 3.5)         | 0.18    |
| No                                                          | 1 [Ref.]              |         | 1 [Ref.]                |         |

\*cPR, Crude Prevalence Ratio; \*\*aPR, Adjusted Prevalence Ratio; CI, Confidence Interval
